1 **Olfactory transmucosal SARS-CoV-2 invasion as port of Central Nervous System entry in COVID-19**  
2 **patients**

3 Jenny Meinhardt<sup>1,§</sup>, Josefine Radke<sup>1,2,3,§</sup>, Carsten Dittmayer<sup>1,§</sup>, Ronja Mothes<sup>1</sup>, Jonas Franz<sup>4</sup>, Michael  
4 Laue<sup>5</sup>, Julia Schneider<sup>6</sup>, Sebastian Brünink<sup>6</sup>, Olga Hassan<sup>1</sup>, Werner Stenzel<sup>1</sup>, Marc Windgassen<sup>7</sup>, Larissa  
5 Rößler<sup>7</sup>, Hans-Hilmar Goebel<sup>1</sup>, Hubert Martin<sup>1</sup>, Andreas Nitsche<sup>5</sup>, Walter J. Schulz-Schaeffer<sup>8</sup>, Samy  
6 Hakrrouch<sup>9</sup>, Martin S. Winkler<sup>10</sup>, Björn Tampe<sup>11</sup>, Sefer Elezkurtaj<sup>12</sup>, David Horst<sup>12</sup>, Lars Oesterhelweg<sup>7</sup>,  
7 Michael Tsokos<sup>7</sup>, Barbara Ingold Heppner<sup>12</sup>, Christine Stadelmann<sup>4</sup>, Christian Drosten<sup>6</sup>, Victor Max  
8 Corman<sup>6</sup>, Helena Radbruch<sup>1,#</sup>, Frank L. Heppner<sup>1,2,14,15,#,\*</sup>

9 **Affiliations:**

10 <sup>1</sup>Department of Neuropathology, Charité – Universitätsmedizin Berlin, corporate member of Freie  
11 Universität Berlin, Humboldt-Universität zu Berlin, and Berlin Institute of Health, 10117 Berlin,  
12 Germany

13 <sup>2</sup>Berlin Institute of Health (BIH), 10117 Berlin, Germany

14 <sup>3</sup>German Cancer Consortium (DKTK), Partner Site Berlin, CCC (Campus Mitte), Invalidenstr. 80,  
15 10115, Berlin, Germany

16 <sup>4</sup>Institute of Neuropathology, University Medical Center, Göttingen, Germany

17 <sup>5</sup>Centre for Biological Threats and Special Pathogens (ZBS), Robert Koch Institute, Berlin, Germany

18 <sup>6</sup>Department of Virology, Charité - Universitätsmedizin Berlin, corporate member of Freie Universität  
19 Berlin and Humboldt-Universität zu Berlin, Berlin Institute of Health, and German Centre for Infection  
20 Research, 10117 Berlin, Germany.

21 <sup>7</sup>Institute of Forensic Medicine, Charité – Universitätsmedizin Berlin, corporate member of Freie  
22 Universität Berlin, Humboldt-Universität zu Berlin, and Berlin Institute of Health, 10117 Berlin,  
23 Germany

24 <sup>8</sup>Institute of Neuropathology, University of the Saarland, Kirrberger Str. 100, 66421 Homburg,  
25 Germany

26 <sup>9</sup>Institute of Pathology, University Medical Center Göttingen, Germany

27 <sup>10</sup>Department of Anaesthesiology and Intensive Care Medicine, University Medical Center Göttingen,  
28 Germany

29 <sup>11</sup>Department of Nephrology and Rheumatology, University Medical Center Göttingen, Germany

30 <sup>12</sup>Institute of Pathology, Charité – Universitätsmedizin Berlin, corporate member of Freie Universität  
31 Berlin, Humboldt-Universität zu Berlin, and Berlin Institute of Health, 10117 Berlin, Germany

32 <sup>13</sup>Institute of Pathology, DRK Kliniken Berlin, 14050 Berlin, Germany

33 <sup>14</sup>Cluster of Excellence, NeuroCure, Charitéplatz 1, 10117 Berlin, Germany

34 <sup>15</sup>German Center for Neurodegenerative Diseases (DZNE) Berlin, 10117 Berlin, Germany

35 <sup>§</sup>These authors contributed equally

36 <sup>#</sup>These authors jointly supervised this work

37 \* Corresponding author: [frank.heppner@charite.de](mailto:frank.heppner@charite.de)

38

39 **Abstract**

40           The newly identified severe acute respiratory syndrome coronavirus 2 (SARS-CoV-2) causes  
41 COVID-19, a pandemic respiratory disease presenting with fever, cough, and often pneumonia.  
42 Moreover, thromboembolic events throughout the body including the central nervous system (CNS)  
43 have been described. Given first indication for viral RNA presence in the brain and cerebrospinal fluid  
44 and in light of neurological symptoms in a large majority of COVID-19 patients, SARS-CoV-2-  
45 penetrance of the CNS is likely. By precisely investigating and anatomically mapping oro- and  
46 pharyngeal regions and brains of 32 patients dying from COVID-19, we not only describe CNS  
47 infarction due to cerebral thromboembolism, but also demonstrate SARS-CoV-2 neurotropism. SARS-  
48 CoV-2 enters the nervous system via trespassing the neuro-mucosal interface in the olfactory mucosa  
49 by exploiting the close vicinity of olfactory mucosal and nervous tissue including delicate olfactory  
50 and sensitive nerve endings. Subsequently, SARS-CoV-2 follows defined neuroanatomical structures,  
51 penetrating defined neuroanatomical areas, including the primary respiratory and cardiovascular  
52 control center in the medulla oblongata.

53

## 54 Introduction

55 There is increasing evidence that the SARS-CoV-2 not only affects the respiratory tract but  
56 also impacts the CNS resulting in neurological symptoms such as loss of smell and taste, headache,  
57 fatigue, nausea and vomiting in more than one third of COVID-19 patients<sup>1,2</sup>. Moreover, acute  
58 cerebrovascular diseases and impaired consciousness have been described<sup>3</sup>. While recent studies  
59 describe the presence of viral RNA in the brain and cerebrospinal fluid (CSF)<sup>4,5</sup> but lack a prove for  
60 genuine SARS-CoV-2 manifestation, a systematic analysis of COVID-19 autopsy brains aimed at  
61 understanding the port of SARS-CoV-2 entry and distribution within the CNS is lacking<sup>6</sup>.

62 The neuroinvasive potential of evolutionarily-related coronaviruses (CoVs) such as SARS-CoV  
63 and MERS-CoV has previously been described<sup>7-9</sup>. SARS-CoV including SARS-CoV-2 enter human host  
64 cells primarily by binding to the cellular receptor angiotensin-converting enzyme 2 (ACE2) and by the  
65 action of the serine protease TMPRSS2 for S protein priming<sup>10</sup>. Supporting evidence comes from  
66 animal studies demonstrating that SARS-CoV is capable of entering the brain upon intranasal  
67 infection of mice expressing human ACE2<sup>8,11</sup>. However, it is not known, which cells in the olfactory  
68 mucosa express these molecules in steady state or under inflammatory or septic conditions<sup>11</sup>, while  
69 there is first evidence for ACE2 expression in neuronal and glial cells in the CNS<sup>13,14</sup>. Along that line it  
70 is of note, that the immunoglobulin superfamily member CD147, which is expressed in neuronal and  
71 non-neuronal cells in the CNS<sup>15,16</sup>, has been shown to act as alternative cellular port for SARS-CoV-2  
72 invasion<sup>17</sup>. To gain a better understanding of SARS-CoV-2 neurotropism and its mechanism of CNS  
73 entry and distribution, we analyzed the cellular mucosal-nervous micro-milieu as first site of viral  
74 infection and replication, followed by a thorough regional mapping of the consecutive olfactory  
75 nervous tracts and defined CNS regions in 32 COVID-19 autopsy cases.

76

## 77 Results

78 Out of 32 COVID-19 autopsy cases, either proven to be RT-qPCR-positive for SARS-CoV-2  
79 prior to death (N=29 of 32), or with clinical presentation highly suggestive of COVID-19 (N=3 of 32),  
80 four patients (corresponding to 13%) presented with acute infarction due to ischemia caused by  
81 (micro)thrombotic/thromboembolic events within the CNS (Supplementary Table 1). Similarly,  
82 microthrombotic events were also detectable in the olfactory mucosa (Supplementary Figure 1).

83 Assessment of viral load by means of RT-qPCR in regionally well-defined tissue samples  
84 including olfactory mucosa (region (R1), olfactory bulb (R2), oral mucosa (uvula; R3), trigeminal  
85 ganglion (R4) and medulla oblongata (R5) demonstrated highest levels of SARS-CoV-2 copies per cell  
86 within the olfactory mucosa sampled directly beneath the cribriform plate (N=13 of 22; Figure 1).  
87 Lower levels of viral RNA were found in the cornea, conjunctiva and oral mucosa, highlighting the  
88 oral and ophthalmic routes as additional potential sites of SARS-CoV-2 CNS entry (Figure 1). Only in  
89 few cases the cerebellum was also positive (N=2 of 21), while the wall of the internal carotid artery,  
90 which served as an internal negative control, was found to be negative in all investigated cases  
91 (N=10). The assessment of subgenomic (sg) RNA as surrogate for active virus replication yielded a  
92 positive result in 4 out of 13 SARS-CoV-2 RNA-positive olfactory mucosa samples and in 2 out of 6  
93 SARS-CoV-2 RNA-positive uvulae, but in none of the other tissues analyzed in this study  
94 (Supplementary Table 1). Patients with shorter disease duration were more likely to be tested  
95 positive for viral RNA in the CNS tissue (Supplementary Table 1). The anatomical proximity between  
96 neurons, nerve fibers and mucosa within the oro- and nasopharynx (Figure 2) and the reported  
97 clinical-neurological signs related to alteration in smell and taste perception suggest that SARS-CoV-2  
98 exploits this neuro-mucosal interface as port of CNS entry. On the apical side of the olfactory  
99 mucosa, dendrites of olfactory receptor neurons (ORNs) project into the nasal cavity, while on the  
100 basal side axons of olfactory receptor neurons merge into fila, which protrude through the cribriform  
101 plate directly into the olfactory bulb (Figure 2), thereby also having contact with the CSF<sup>18</sup>.

102 Further evidence and support for a site-specific infection and inflammation by SARS-CoV-2  
103 was provided by immunohistochemistry (Figure 3). Cells of the olfactory mucosa showed strong  
104 immunoreactivity in a characteristic perinuclear pattern when an antibody against the SARS-CoV  
105 spike protein was used. Furthermore, early activated macrophages formed small cell clusters in the  
106 epithelium expressing myeloid-related protein 14 (MRP14) (Supplementary Figure 2), initiating and  
107 regulating an immune cascade, which e.g. upon influenza virus infection, has been shown to  
108 orchestrate virus-associated inflammation by acting as endogenous damage-associated molecular  
109 pattern (DAMP), ultimately initiating TLR4-MyD88 signalling<sup>19</sup>.

110 Additional support for SARS-CoV-2 persistence was provided by ultrastructural analyses of  
111 ultrathin sections. We found Coronavirus-like particles (Figure 3) – despite subtle ultrastructural  
112 differences compared to coronavirus derived from infected cell cultures providing a somewhat  
113 different milieu (Supplementary Figure 3) - fulfilling the criteria of size, shape, substructure  
114 (membrane, surface projections and internal electron dense material, resembling ribonucleoprotein)  
115 and intracellular localization of Coronavirus particles, while being clearly distinct from intrinsic  
116 cellular structures resembling Coronavirus particles<sup>20–25</sup>.

117

118

## 119 Discussion

120 We provide first evidence that SARS-CoV-2 neuroinvasion occurs at the neuro-mucosal  
121 interface by transmucosal trespassing via regional nervous structures followed by a transport along  
122 the olfactory tract of the CNS, thus explaining some of the well-documented neurological symptoms  
123 in COVID-19 patients including alterations of smell and taste perception. Further studies are required  
124 to identify the precise cellular and molecular entry mechanism as well as receptors in the olfactory  
125 mucosa, where also non-neuronal pathways may play a role<sup>26</sup>. This will include a precise  
126 characterization of ACE2, TMPRSS2 and of CD147 expression, which have been implicated in enabling  
127 SARS-CoV-2 invasion in cells. Moreover, in line with recent clinical data demonstrating  
128 thromboembolic CNS events described in few patients<sup>27</sup>, we found in 13% of the 32 investigated  
129 cases also the histopathological correlate of microthrombosis and territorial brain infarcts.

130 The presence of genuine virus in the olfactory mucosa with its delicate olfactory and  
131 sensitive – partially axonally damaged (Supplementary Figure 1) nerves in conjunction with SARS-  
132 CoV-2 RNA manifestation preferentially in those neuroanatomical areas receiving olfactory tract  
133 projections (Figure 1) may speak in favor of SARS-CoV-2 neuroinvasion occurring via axonal transport.  
134 However, several other mechanisms or routes, including transsynaptic transfer across infected  
135 neurons, infection of vascular endothelium, or leukocyte migration across the blood-brain barrier  
136 (BBB), or combinations thereof, be it in addition or exclusive, cannot be excluded at present<sup>14</sup>.

137 The detection of - compared to values measured in the lower respiratory tract  
138 (Supplementary Table 1) - persistently high levels of SARS-CoV-2 RNA in the olfactory mucosa (124%  
139 as mean value compared to lower respiratory tract) up to 53 days after initial symptoms  
140 (Supplementary Table 1), including the detection of sgRNA suggests that olfactory mucosa remains a  
141 region of continuous SARS-CoV-2 replication and persistence, thus enabling a constant viral  
142 replenishment for the CNS. In line with our findings there is a comparable SARS-CoV-2 infection  
143 gradient from the nose to the lungs which is paralleled by expression of the receptor molecule  
144 ACE2<sup>28</sup>. Although this remains to be speculation and widespread dysregulation of homeostasis of  
145 cardiovascular, pulmonic and renal systems has to be regarded as the leading cause in fatal COVID-19  
146 cases, previous findings of SARS-CoV infection and other coronaviruses in the nervous system<sup>29</sup> as  
147 well as the herein described presence of SARS-CoV-2 RNA in the medulla oblongata comprising the  
148 primary respiratory and cardiovascular control center bring to mind the possibility that SARS-CoV2  
149 infection, at least in some instances, can aggravate respiratory or cardiac problems - or even cause  
150 failure - in a CNS-mediated manner<sup>6,30</sup>.

151

152            Even when following distinct routes upon first CNS entry and - based on our findings - in the  
153            absence of clear signs of widespread distribution of SARS-CoV-2 in the CNS (i.e. no signs of  
154            meningitis/encephalitis in COVID-19 cases), it cannot be excluded that the virus may spread more  
155            widely to other brain regions, thus eventually contributing to a more severe or even chronic disease  
156            course, depending on various factors such as the time of virus persistence, viral load, and immune  
157            status, amongst others.

158



159 **Methods:**

160 **Study design**

161 32 autopsy cases of either PCR-confirmed SARS-CoV-2 COVID-19 patients (N=29 of 32) or of patients  
162 clinically highly suggestive of COVID-19 (N=3 out of 32) were included. Autopsies were performed at  
163 the Department of Neuropathology and the Institute of Pathology, Charité - Universitätsmedizin  
164 Berlin (N=25 out of 32) including one referral case from the Institute of Pathology, DRK Kliniken  
165 Berlin, the Institutes of Pathology and of Neuropathology, University Medicine Göttingen (N=6 out of  
166 32) and the Institute of Forensic Medicine Charité - Universitätsmedizin Berlin (N=1 out of 32). This  
167 study was approved by the Ethics Committee of the Charité (EA 1/144/13 and EA2/066/20) as well as  
168 by the Charité-BIH COVID-19 research board and was in compliance with the Declaration of Helsinki.  
169 In all deceased patients a whole-body autopsy was performed, which included a thorough  
170 histopathologic and molecular evaluation comprising virological assessment of SARS-CoV-2 RNA  
171 levels as indicated in Supplementary Table 1. Clinical records were assessed for pre-existing medical  
172 conditions and medications, current medical course, and ante-mortem diagnostic findings.

173 **SARS-CoV- and SARS-CoV-2-specific PCR including subgenomic RNA assessment**

174 RNA was purified from ~50 mg of homogenized tissue from all organs by using the MagNAPure 96  
175 system and the MagNA Pure 96 DNA and Viral NA Large Volume Kit (Roche) following the  
176 manufacturer's instructions.

177 Quantitative real-time PCR for SARS-CoV-2 was performed on RNA extracts with RT-qPCR targeting  
178 the SARS-CoV-2 E-gene. Quantification of viral RNA was done using photometrically quantified *in*  
179 *vitro* RNA transcripts as described previously<sup>33</sup>. Total DNA was measured in all extracts by using the  
180 Qubit dsDNA HS Assay kit (Thermo Fisher Scientific, Karlsruhe, Germany).

181 Detection of subgenomic RNA (sgRNA), as correlate of active virus replication in the tested tissue was  
182 done using oligonucleotides targeting the leader transcriptional regulatory sequence and region  
183 within the sgRNA coding for the SARS-CoV-2 E gene, as described previously<sup>34</sup>.

184

185

186

## 187 **Electron microscopy**

188 Autopsy tissues were fixed with 2.5% glutaraldehyde in 0.1M sodium cacodylate buffer, postfixed  
189 with 1% osmium tetroxide in 0.05M sodium cacodylate, dehydrated using graded acetone series,  
190 then infiltrated and embedded in Renlam resin. *En bloc* staining with uranyl acetate and  
191 phosphotungstic acid was performed at the 70% acetone dehydration step. 500 nm semithin sections  
192 were cut using an ultramicrotome (Ultracut E, Reichert-Jung) and a histo jumbo diamond knife  
193 (Diatome), transferred onto glass slides, stretched at 120°C on a hot plate and stained with Toluidine  
194 blue at 80°C. 70 nm ultrathin sections were cut using the same ultramicrotome and an ultra 35°  
195 diamond knife (Diatome), stretched with xylene vapor, collected onto pioloform coated slot grids and  
196 then stained with lead citrate. Standard TEM was performed using a Zeiss 906 in conjunction with a  
197 2k CCD camera (TRS). Large-scale digitization was performed using a Zeiss Gemini 300 field-emission  
198 scanning electron microscope in conjunction with a STEM-detector via Atlas 5 software at 4-6 nm  
199 pixel size. Regions of interest of the large-scale datasets were saved by annotation (“mapped”) and  
200 then recorded at very high resolution using 0.5-1 nm pixel size.

## 201 **Immunohistochemical procedures and stainings**

202 Routine histological stainings (Hematoxylin and eosin (HE), Masson-Goldner, Periodic acid-Schiff  
203 reaction (PAS), and Toluidine blue) were performed according to standard procedures.  
204 Immunohistochemical stainings were either performed on a Benchmark XT autostainer (Ventana  
205 Medical Systems, Tuscon, AZ, USA) with standard antigen retrieval methods (CC1 buffer, pH8.0,  
206 Ventana Medical Systems, Tuscon, AZ, USA) or manually using 4-µm-thick FFPE tissue sections. The  
207 following primary antibodies were used: monoclonal mouse anti-S100 (DAKO Z0311, 1:3000),  
208 monoclonal mouse anti-AE1/AE3 (DAKO M3515, 1:200), monoclonal mouse anti-MRP14 (Acris,  
209 BM4026B, 1:500, pretreatment protease), monoclonal mouse anti-CD56 (Serotec, ERIC-1, 1:200),  
210 mouse monoclonal anti-SARS spike glycoprotein antibody (Abcam, ab272420, 1:100, pretreatment  
211 Citrate + MW) and polyclonal rabbit anti-OLIG2 (IBL, 18953, 1:150, pretreatment Tris-EDTA + MW).  
212 Briefly, primary antibodies were applied and developed either using the iVIEW DAB Detection Kit  
213 (Ventana Medical Systems) and the ultraView Universal Alkaline Phosphatase Red Detection Kit  
214 (Ventana Medical Systems) or by manual application of biotinylated secondary antibodies (Merck,  
215 RPN1001, RPN1004), peroxidase-conjugated avidin, and diaminobenzidine (DAB, Sigma, D5637) or 3-  
216 Amino-9-Ethylcarbazol (AEC). Sections were counterstained with hematoxylin, dehydrated in graded  
217 alcohol and xylene, mounted and coverslipped. IHC stained sections were evaluated by at least two  
218 board-certified neuropathologists with concurrence. For data handling of whole slides images an  
219 OME-TIFF workflow was used<sup>35</sup>.

220

## 221 **Acknowledgements**

222 This work was supported by the Deutsche Forschungsgemeinschaft (DFG, German Research  
223 Foundation) under Germany's Excellence Strategy – EXC-2049 – 390688087, as well as SFB TRR 167  
224 and HE 3130/6-1 to F.L.H., SFB 958/Z02 to J.S., SFB TRR 130 to H.R., EXC 2067/1- 390729940, SFB TRR  
225 274 and STA 1389/5-1 to C.S., by the German Center for Neurodegenerative Diseases (DZNE) Berlin,  
226 and by the European Union (PHAGO, 115976; Innovative Medicines Initiative-2; FP7-PEOPLE-2012-  
227 ITN: NeuroKine). We are indebted to Francisca Egelhofer, Petra Matylewski, Kathrein Permien, Vera  
228 Wolf, Sandra Meier, René Müller, Uta Scheidt and Katja Schulz for excellent technical assistance and  
229 advice. We thank the Core Facility for Electron Microscopy of the Charité for support in acquisition of  
230 the data. The authors are most grateful to the patients and their relatives for consenting to autopsy  
231 and subsequent research, which were facilitated by the Biobank of the Department of  
232 Neuropathology – Universitätsmedizin Berlin, Germany. Furthermore, we thank the Charité  
233 foundation for financial support. Cartoon images were partially created with Biorender.com.

## 234 **Author Contributions**

235 J.M., J.R., R.M., J.F., O.H., M.W., L.R., H.M., W.J.S-S., C.S., S.H., M.S.W., B.T., S.E., D.H., L.O., M.T,  
236 B.I.H., H.R., F.L.H. performed clinical workup and sections and/or histological analyses, Ca.D., H.H.G.,  
237 M.L. and W.S. did ultrastructural analyses, J.S., S.B., Ch.D. and V.M.C. made viral RT-qPCR analyses.  
238 All authors contributed to the experiments and analyzed data; H.R. and F.L.H. designed and  
239 supervised the study; J.M., J.R., and Ca.D. prepared figures. All authors wrote, revised and approved  
240 the manuscript.

241

## 242 **Competing Interests**

243 All authors declare no competing interest.

244

245

246 **References**

- 247 1. Huang, C. *et al.* Clinical features of patients infected with 2019 novel coronavirus in Wuhan,  
248 China. *Lancet* **395**, 497–506 (2020).
- 249 2. Conde Cardona, G., Quintana Pájaro, L. D., Quintero Marzola, I. D., Ramos Villegas, Y. & Moscote  
250 Salazar, L. R. Neurotropism of SARS-CoV 2: Mechanisms and manifestations. *J. Neurol. Sci.* **412**,  
251 116824 (2020).
- 252 3. Mao, L. *et al.* Neurologic Manifestations of Hospitalized Patients With Coronavirus Disease 2019  
253 in Wuhan, China. *JAMA Neurol* (2020) doi:10.1001/jamaneurol.2020.1127.
- 254 4. Puelles, V. G. *et al.* Multiorgan and Renal Tropism of SARS-CoV-2. *N. Engl. J. Med.* (2020)  
255 doi:10.1056/NEJMc2011400.
- 256 5. Moriguchi, T. *et al.* A first case of meningitis/encephalitis associated with SARS-Coronavirus-2.  
257 *Int. J. Infect. Dis.* **94**, 55–58 (2020).
- 258 6. Otero, J. J. Neuropathologists play a key role in establishing the extent of COVID-19 in human  
259 patients. *Free Neuropathology* 11 Seiten (2020) doi:10.17879/FRENEUROPATHOLOGY-2020-  
260 2736.
- 261 7. Glass, W. G., Subbarao, K., Murphy, B. & Murphy, P. M. Mechanisms of host defense following  
262 severe acute respiratory syndrome-coronavirus (SARS-CoV) pulmonary infection of mice. *J.*  
263 *Immunol.* **173**, 4030–4039 (2004).
- 264 8. Li, K. *et al.* Middle East Respiratory Syndrome Coronavirus Causes Multiple Organ Damage and  
265 Lethal Disease in Mice Transgenic for Human Dipeptidyl Peptidase 4. *J. Infect. Dis.* **213**, 712–722  
266 (2016).
- 267 9. Netland, J., Meyerholz, D. K., Moore, S., Cassell, M. & Perlman, S. Severe acute respiratory  
268 syndrome coronavirus infection causes neuronal death in the absence of encephalitis in mice  
269 transgenic for human ACE2. *J. Virol.* **82**, 7264–7275 (2008).
- 270 10. Hoffmann, M. *et al.* SARS-CoV-2 Cell Entry Depends on ACE2 and TMPRSS2 and Is Blocked by a  
271 Clinically Proven Protease Inhibitor. *Cell* **181**, 271-280.e8 (2020).
- 272 11. Doobay, M. F. *et al.* Differential expression of neuronal ACE2 in transgenic mice with  
273 overexpression of the brain renin-angiotensin system. *Am. J. Physiol. Regul. Integr. Comp.*  
274 *Physiol.* **292**, R373-381 (2007).
- 275 12. Butowt, R. & Bilinska, K. SARS-CoV-2: Olfaction, Brain Infection, and the Urgent Need for Clinical  
276 Samples Allowing Earlier Virus Detection. *ACS Chem. Neurosci.* **11**, 1200–1203 (2020).

- 277 13. Chen, R. *et al.* *The spatial and cell-type distribution of SARS-CoV-2 receptor ACE2 in human and*  
278 *mouse brain.* <http://biorxiv.org/lookup/doi/10.1101/2020.04.07.030650> (2020)  
279 doi:10.1101/2020.04.07.030650.
- 280 14. Zubair, A. S. *et al.* *Neuropathogenesis and Neurologic Manifestations of the Coronaviruses in the*  
281 *Age of Coronavirus Disease 2019: A Review.* *JAMA Neurol* (2020)  
282 doi:10.1001/jamaneurol.2020.2065.
- 283 15. Grass, G. D. & Toole, B. P. *How, with whom and when: an overview of CD147-mediated*  
284 *regulatory networks influencing matrix metalloproteinase activity.* *Bioscience Reports* **36**, e00283  
285 (2016).
- 286 16. Kanyenda, L. J. *et al.* *The dynamics of CD147 in Alzheimer’s disease development and pathology.*  
287 *J. Alzheimers Dis.* **26**, 593–605 (2011).
- 288 17. Wang, K. *et al.* *SARS-CoV-2 invades host cells via a novel route: CD147-spike protein.*  
289 <http://biorxiv.org/lookup/doi/10.1101/2020.03.14.988345> (2020)  
290 doi:10.1101/2020.03.14.988345.
- 291 18. van Riel, D., Verdijk, R. & Kuiken, T. *The olfactory nerve: a shortcut for influenza and other viral*  
292 *diseases into the central nervous system.* *J. Pathol.* **235**, 277–287 (2015).
- 293 19. Tsai, S.-Y. *et al.* *DAMP molecule S100A9 acts as a molecular pattern to enhance inflammation*  
294 *during influenza A virus infection: role of DDX21-TRIF-TLR4-MyD88 pathway.* *PLoS Pathog.* **10**,  
295 e1003848 (2014).
- 296 20. Varga, Z. *et al.* *Endothelial cell infection and endotheliitis in COVID-19.* *Lancet* **395**, 1417–1418  
297 (2020).
- 298 21. Goldsmith, C. S., Miller, S. E., Martines, R. B., Bullock, H. A. & Zaki, S. R. *Electron microscopy of*  
299 *SARS-CoV-2: a challenging task.* *Lancet* (2020) doi:10.1016/S0140-6736(20)31188-0.
- 300 22. Goldsmith, C. S. *et al.* *Ultrastructural characterization of SARS coronavirus.* *Emerging Infect. Dis.*  
301 **10**, 320–326 (2004).
- 302 23. Goldsmith, C. S. & Miller, S. E. *Modern uses of electron microscopy for detection of viruses.* *Clin.*  
303 *Microbiol. Rev.* **22**, 552–563 (2009).
- 304 24. Ksiazek, T. G. *et al.* *A novel coronavirus associated with severe acute respiratory syndrome.* *N.*  
305 *Engl. J. Med.* **348**, 1953–1966 (2003).
- 306 25. Blanchard, E. & Roingeard, P. *Virus-induced double-membrane vesicles.* *Cell. Microbiol.* **17**, 45–  
307 50 (2015).

- 308 26. Brann, D. H. *et al.* *Non-neuronal expression of SARS-CoV-2 entry genes in the olfactory system*  
309 *suggests mechanisms underlying COVID-19-associated anosmia.*  
310 <http://biorxiv.org/lookup/doi/10.1101/2020.03.25.009084> (2020)  
311 doi:10.1101/2020.03.25.009084.
- 312 27. Oxley, T. J. *et al.* Large-Vessel Stroke as a Presenting Feature of Covid-19 in the Young. *N Engl J*  
313 *Med* **382**, e60 (2020).
- 314 28. Hou, Y. J. *et al.* SARS-CoV-2 Reverse Genetics Reveals a Variable Infection Gradient in the  
315 Respiratory Tract. *Cell* S0092867420306759 (2020) doi:10.1016/j.cell.2020.05.042.
- 316 29. Desforges, M., Le Coupanec, A., Brison, E., Meessen-Pinard, M. & Talbot, P. J. Neuroinvasive and  
317 neurotropic human respiratory coronaviruses: potential neurovirulent agents in humans. *Adv.*  
318 *Exp. Med. Biol.* **807**, 75–96 (2014).
- 319 30. Baig, A. M., Khaleeq, A., Ali, U. & Syeda, H. Evidence of the COVID-19 Virus Targeting the CNS:  
320 Tissue Distribution, Host-Virus Interaction, and Proposed Neurotropic Mechanisms. *ACS Chem*  
321 *Neurosci* **11**, 995–998 (2020).
- 322 31. Wang, Y.-Z. *et al.* Olig2 regulates terminal differentiation and maturation of peripheral olfactory  
323 sensory neurons. *Cell. Mol. Life Sci.* (2019) doi:10.1007/s00018-019-03385-x.
- 324 32. Laue, M. Electron microscopy of viruses. *Methods Cell Biol.* **96**, 1–20 (2010).
- 325 33. Corman VM, Landt O, Kaiser M, et al. Detection of 2019 novel coronavirus (2019-nCoV) by real-  
326 time RT-PCR. *Euro Surveill.* 2020;25(3):2000045. doi:10.2807/1560-7917.ES.2020.25.3.2000045
- 327 34. Wölfel, R., Corman, V.M., Guggemos, W. et al. Virological assessment of hospitalized patients  
328 with COVID-2019. *Nature* **581**, 465–469 (2020). <https://doi.org/10.1038/s41586-020-2196-x>
- 329 35. Besson, S. *et al.* Bringing Open Data to Whole Slide Imaging. *Digit Pathol (2019)* **2019**, 3–10  
330 (2019).  
331  
332  
333  
334  
335  
336  
337  
338  
339  
340

341  
342  
343  
344

## **Figures 1 - 3 (incl. Figure legends)**

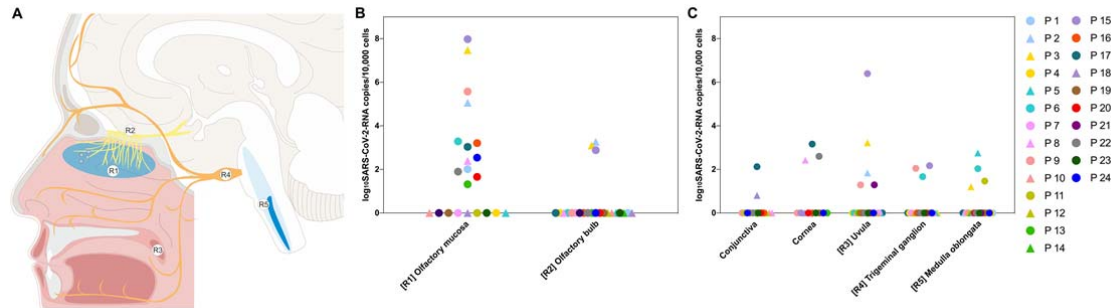

345

346

347 **Figure 1: SARS-CoV-2 RNA levels of deceased COVID-19 patients in anatomically distinctly mapped**  
348 **oro- and nasopharyngeal as well as CNS regions**

349 Cartoon depicting the anatomical structures sampled for histomorphological, ultrastructural and  
350 molecular analyses including SARS-CoV-2 RNA measurement from fresh (i.e. non-formalin-fixed)  
351 specimens of deceased COVID-19 patients (A). Specimens were taken from the olfactory mucosa  
352 underneath of the cribriform plate (Region (R)1, blue, N=22), the olfactory bulb (R2, yellow, N=23),  
353 from different branches of the trigeminal nerve (including conjunctiva (N=15), cornea (N=12),  
354 mucosa covering the uvula (R3, N=20)), the respective trigeminal ganglion in orange (R4, N=20), and  
355 the cranial nerve nuclei in the medulla oblongata (R5, dark blue, N=23). The quantitative results for  
356 each patient are shown in a logarithmic scale normalized on 10,000 cells (B, C). Female patients are  
357 displayed in triangular, male in circular symbols. P=patient.

358



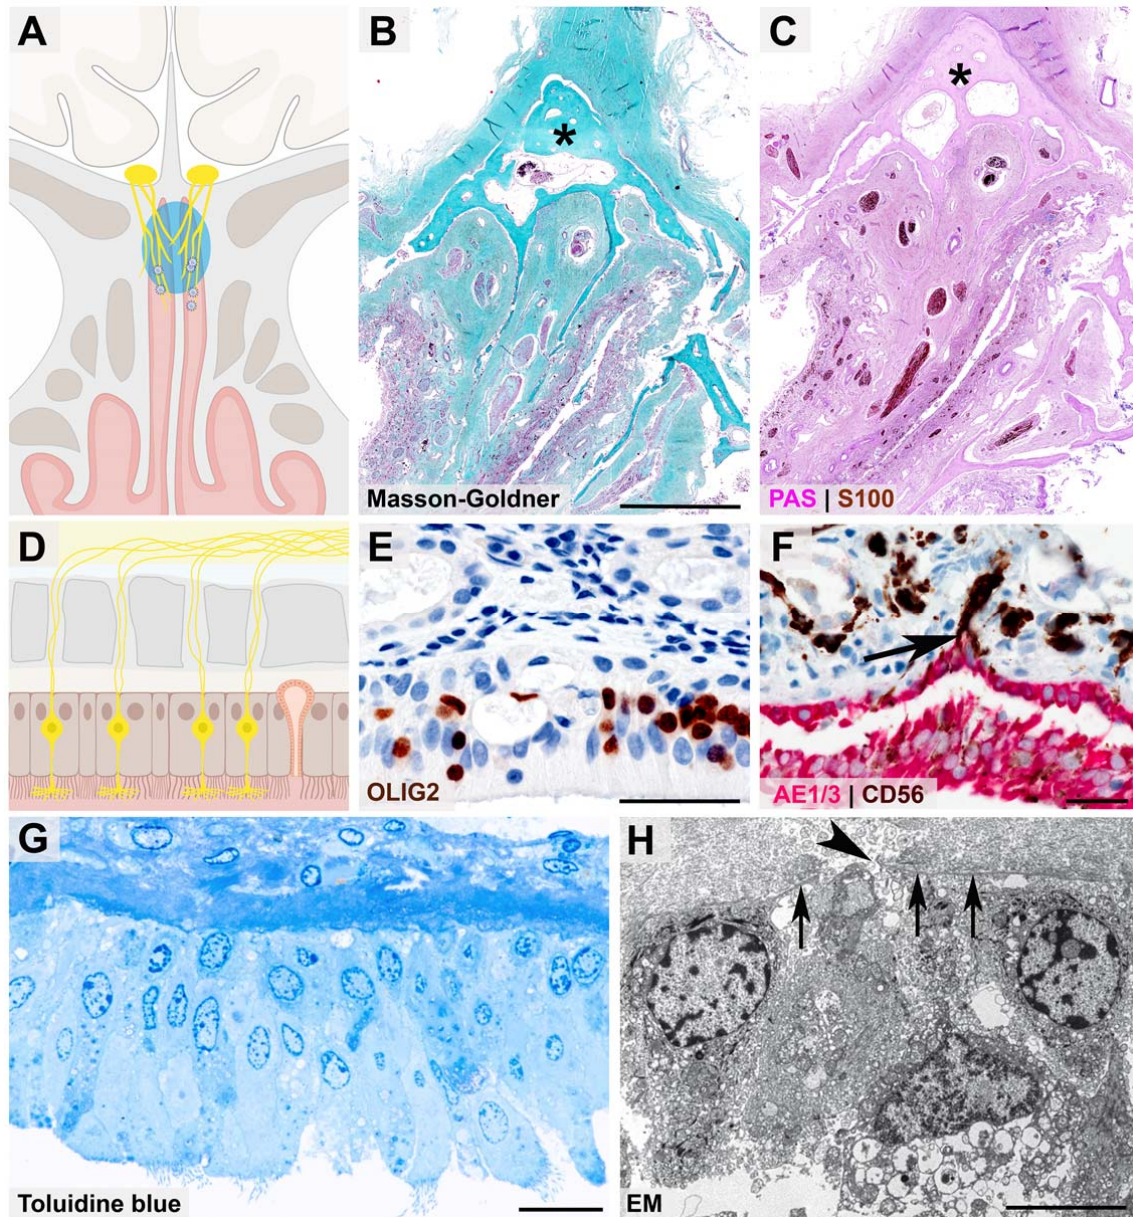

359

360 **Figure 2: Close anatomical proximity of nervous and epithelial tissues in the olfactory mucosa**

361 Cartoon (A) and histopathological coronal cross-sections (B - C) depicting the paranasal sinus region  
362 with the osseous cribriform plate (turquoise color and asterisk in B, pink color and asterisk in C) and  
363 the close anatomical proximity of the olfactory mucosa (green in B, purple in C) and nervous tissue  
364 characterized by nerve fibers immunoreactive for S100 protein (C, brown color). Cartoon (D)  
365 resembling the olfactory mucosa, which is composed of pseudostratified ciliated columnar  
366 epithelium, basement membrane, and lamina propria, also containing mucus-secreting Bowman  
367 glands and bipolar olfactory receptor neurons (ORNs), which coalesce the epithelial layer.  
368 Immunohistochemical staining of the olfactory mucosa (E, F) showing nuclear expression of OLIG2

369 specifying late neuronal progenitor and newly formed neurons (E, brown color)<sup>31</sup>, which are closely  
370 intermingled with epithelial cells (F, immunoreactivity for the pancytokeratin marker AE1/3, red  
371 color). The basement membrane underneath the columnar AE1/3-positive epithelium (F, red color) is  
372 discontinued due to CD56-positive (F, brown color) axonal projections of ORNs (F, arrow). The ORN  
373 dendrite carries multiple cilia and protrudes into the nasal cavity (G, semithin section, toluidine blue  
374 staining), while the axon (H, arrowhead) crosses the olfactory mucosa basement membrane (H,  
375 arrows) as a precondition for ORN projection into the glomeruli of the olfactory bulb, which is readily  
376 visible at the ultrastructural level). Scale bars: B: 3.5 cm; E, F: 50  $\mu$ m; G: 20  $\mu$ m; H: 5  $\mu$ m.  
377

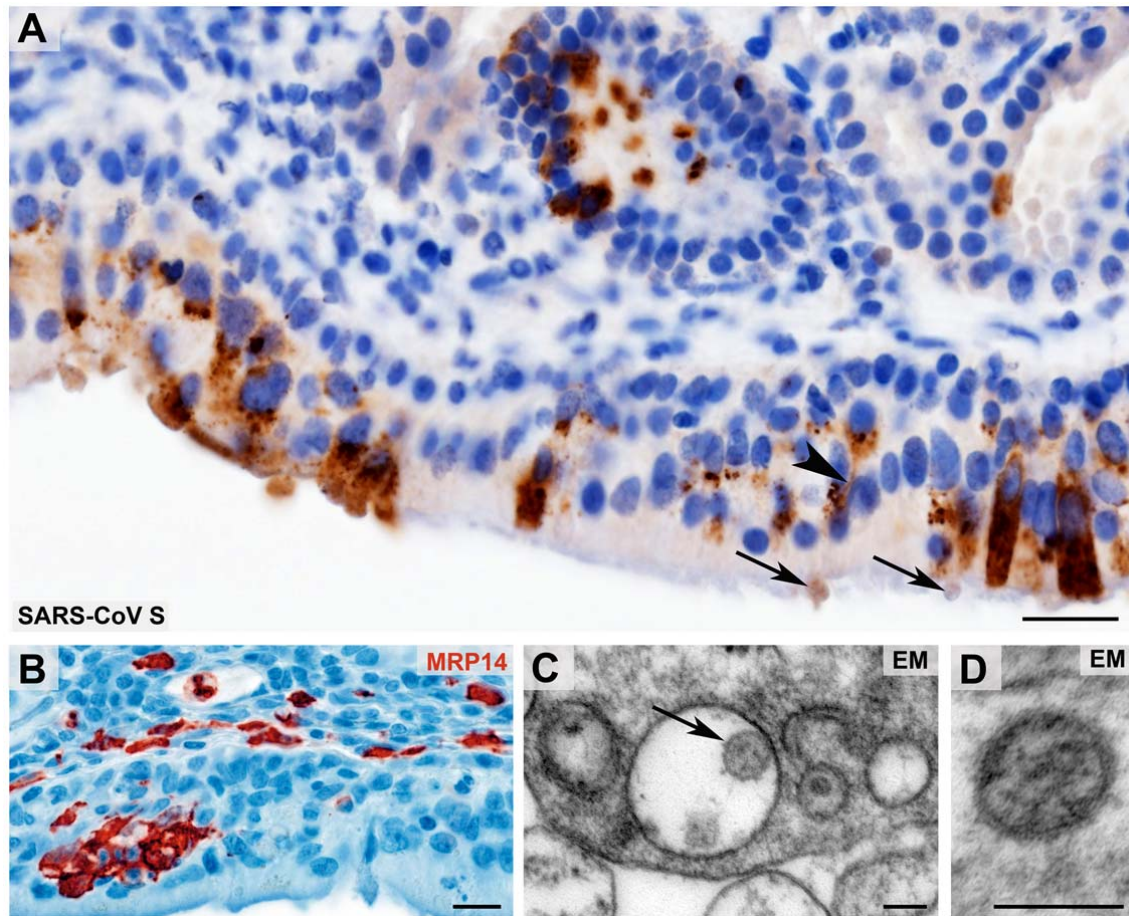

378

379 **Figure 3: Morphological evidence of SARS-CoV presence and first innate immune cell response**  
380 **within the olfactory mucosa**

381 Coronavirus antigen (A, SARS-CoV Spike Protein (SARS-CoV S), brown color) exhibits a cytoplasmic  
382 staining with perinuclear accentuation of infected mucosal (epithelial) cells and identifies SARS-CoV-  
383 positive dendrites (arrowhead) and vesicles at the dendrite tips (arrows) of the olfactory receptor  
384 neurons. Small clusters of infiltrating, early activated macrophages and granulocytes (MRP14, red  
385 color) in the olfactory epithelium upon SARS-CoV-2 infection (B). Ultrastructural images of two  
386 different examples of Coronavirus-like particles in the olfactory mucosa (C - D; arrow in C) fulfilling  
387 the criteria of size, shape, structural features (membrane, surface structures, electron dense material  
388 within the particle, resembling ribonucleoprotein) and localization (C, cytoplasmic localization within  
389 a membrane compartment, sometimes with typical attachment on the inner membrane surface as  
390 shown in this example; D, extracellular). Scale bars: A, B: 20  $\mu$ m; C, D: 100 nm,

391

**A**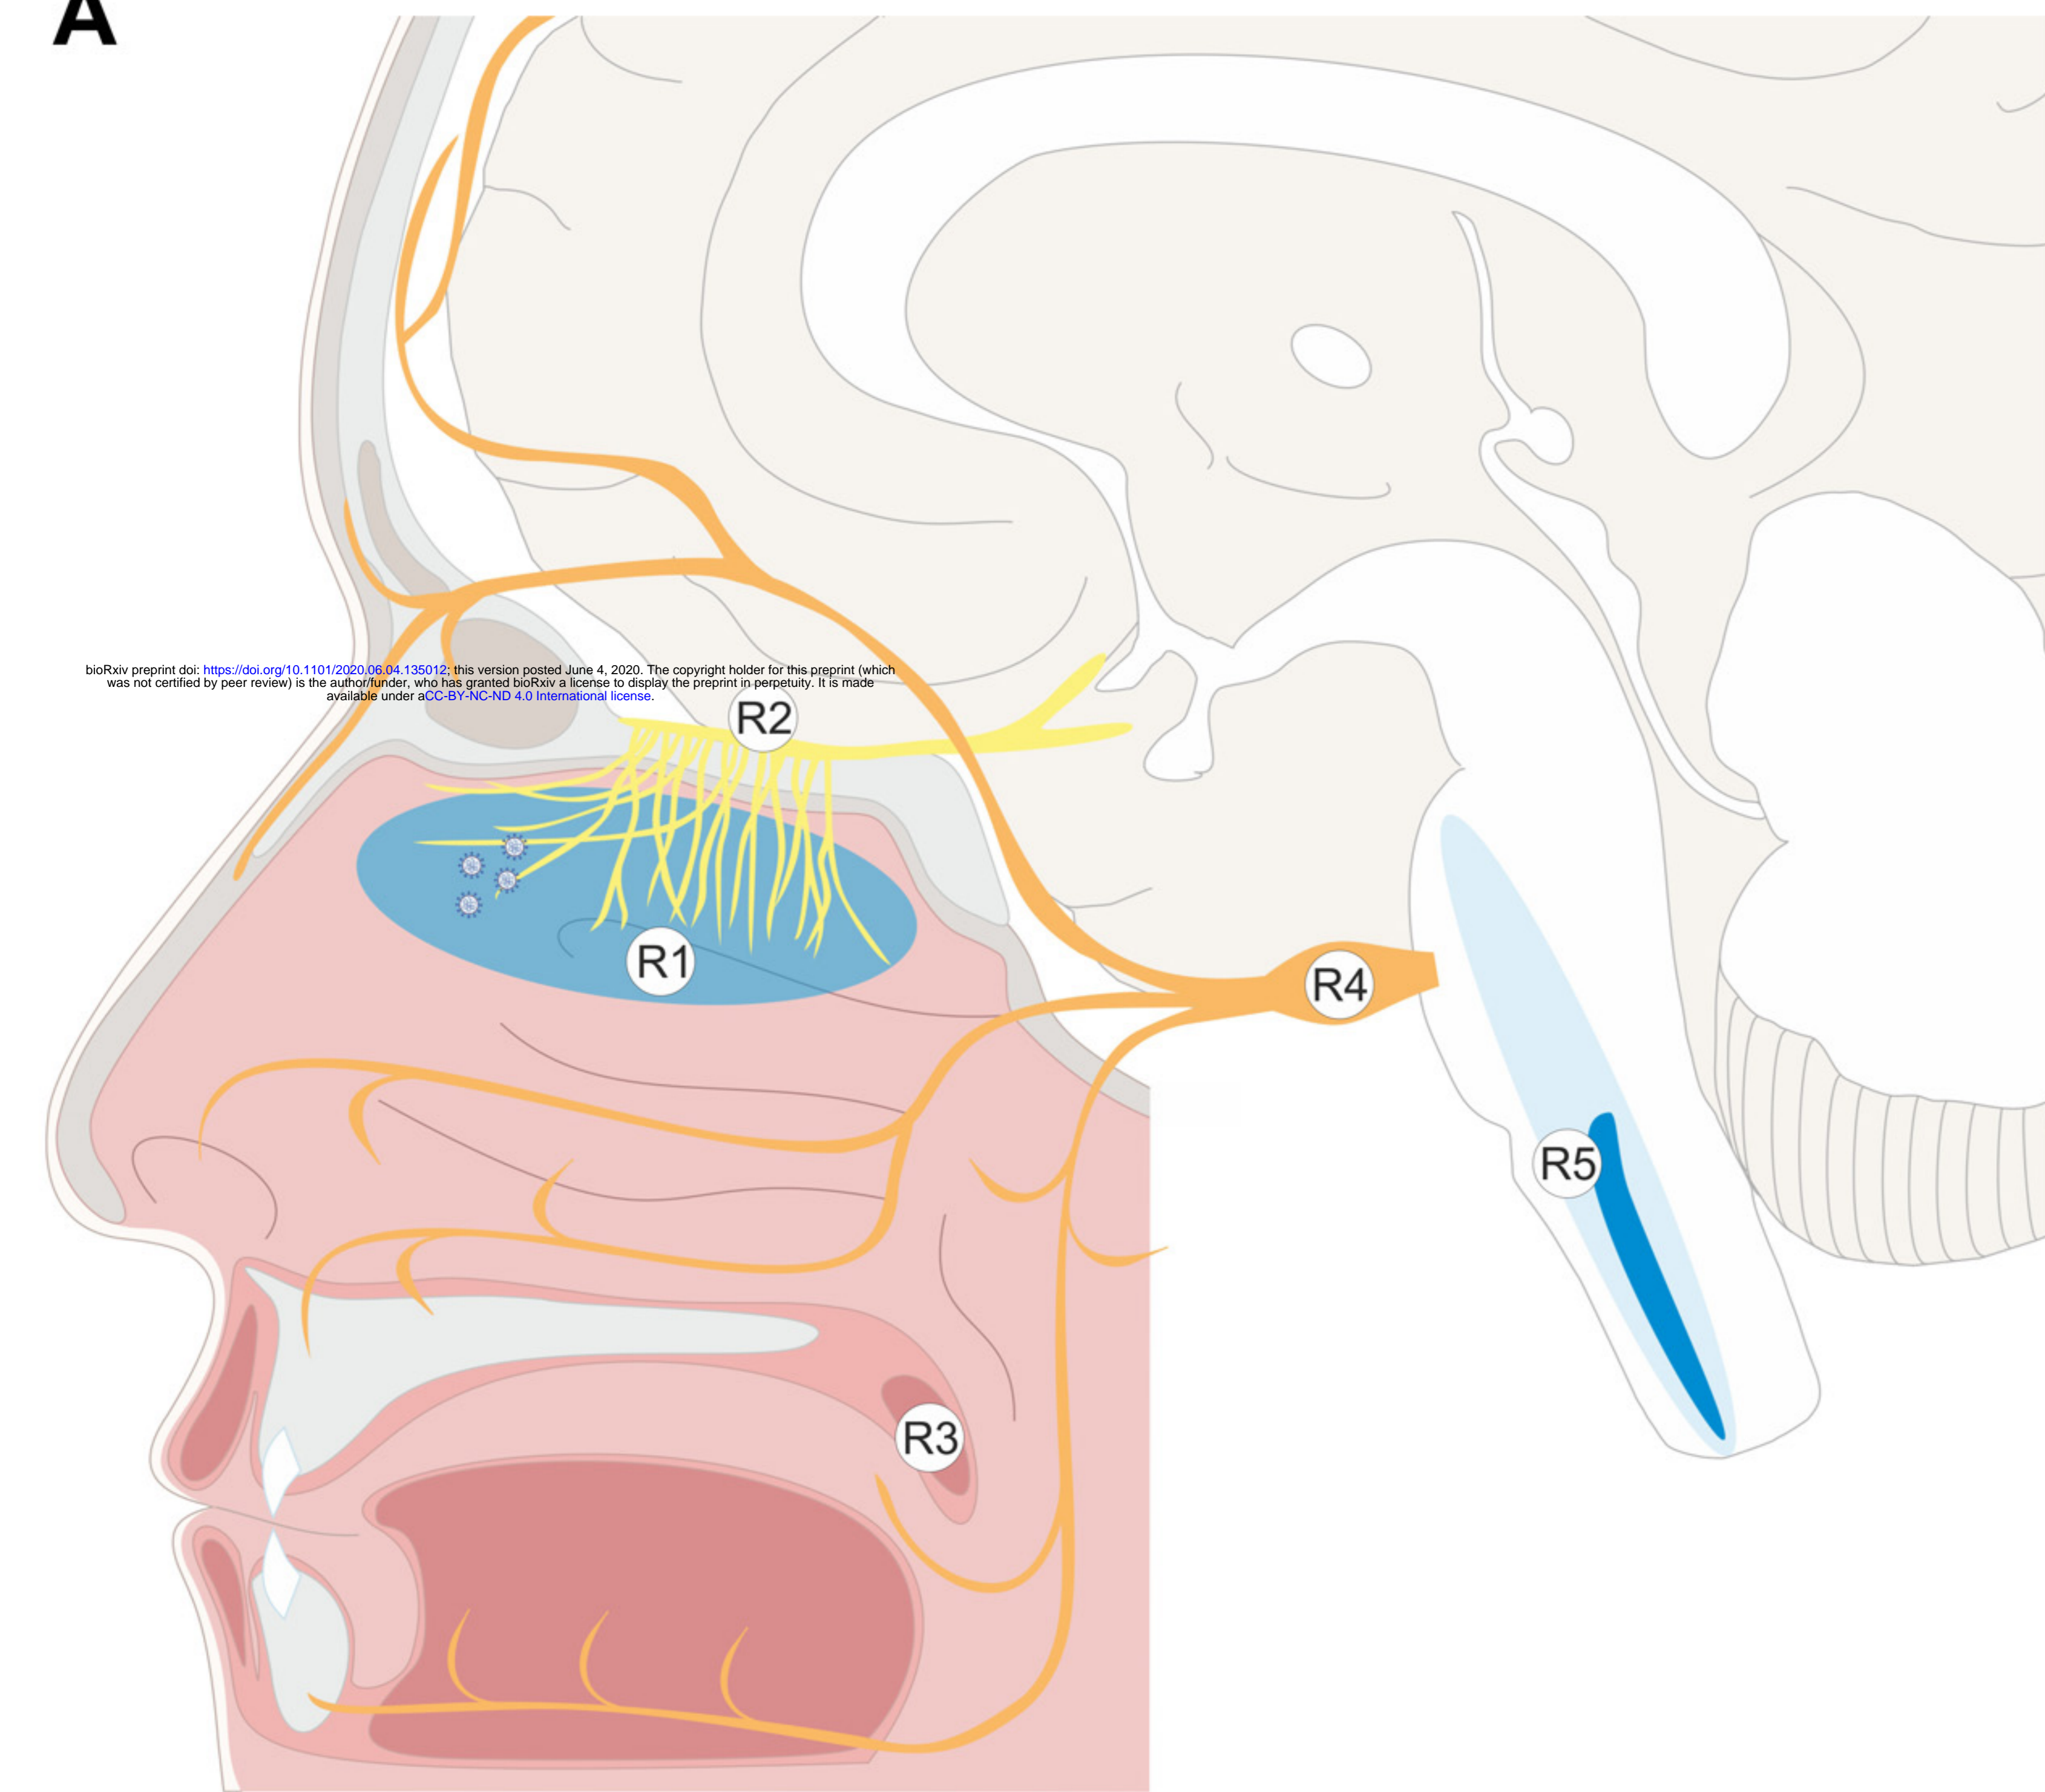**B**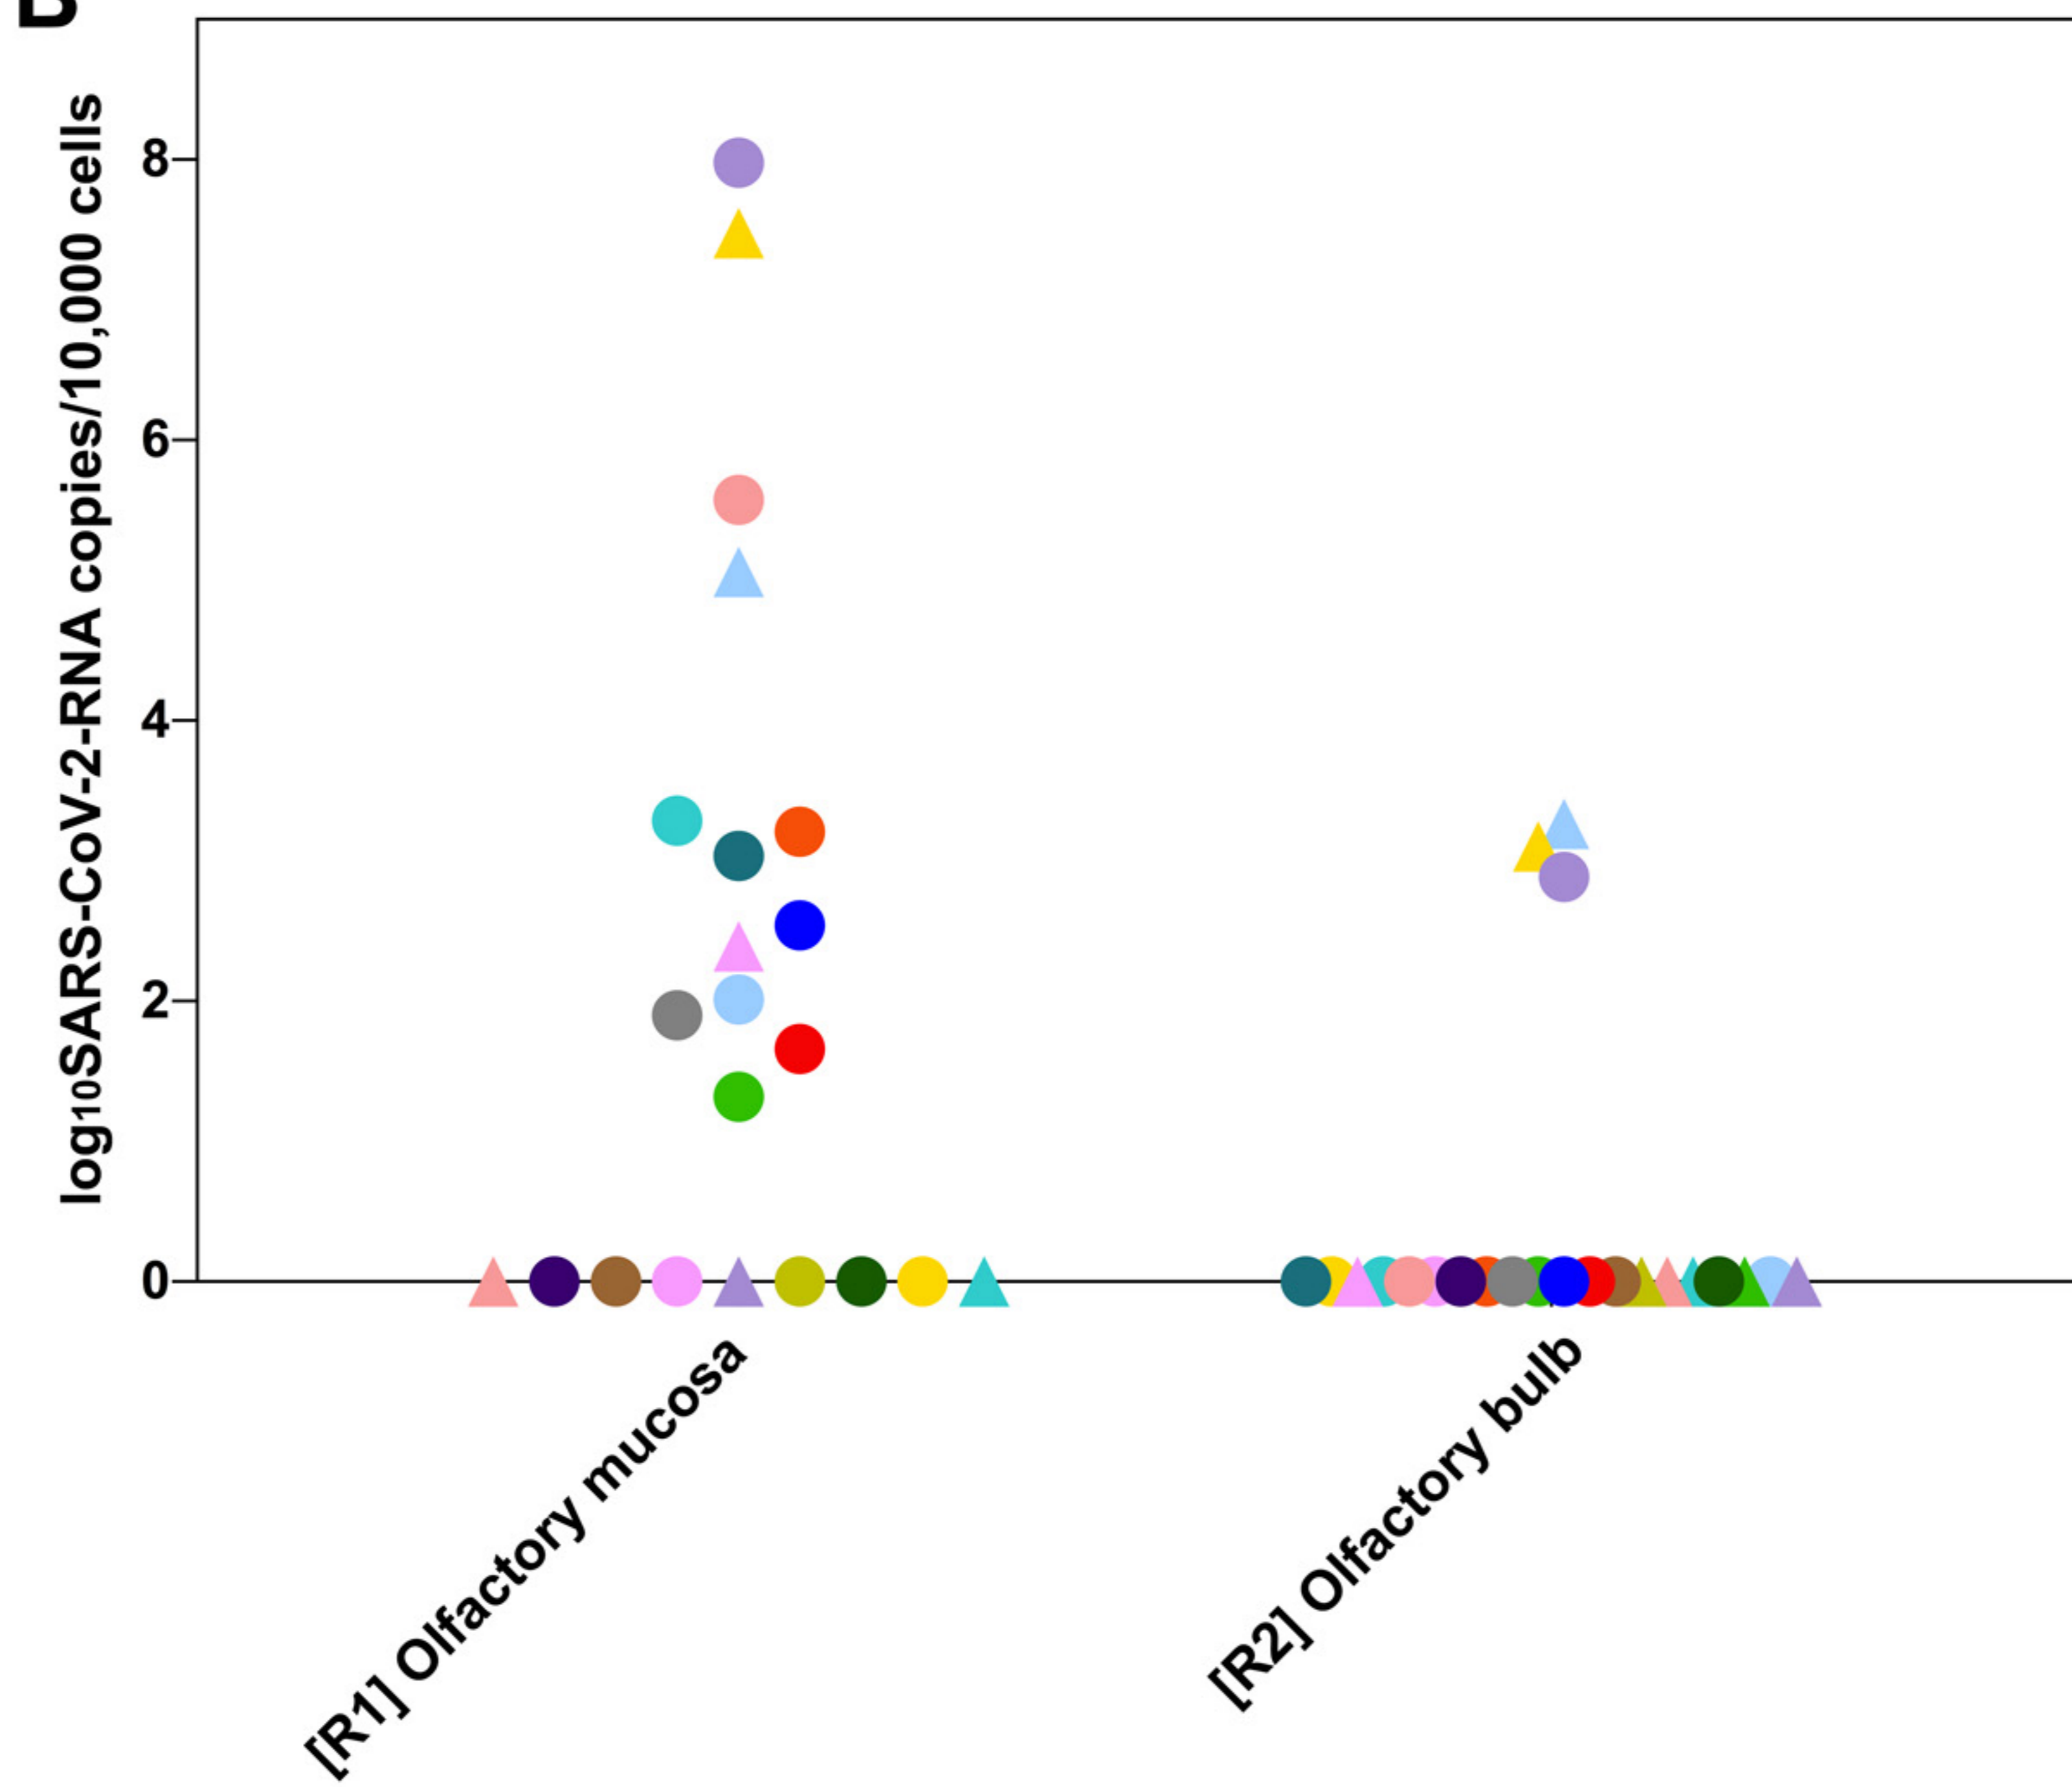**C**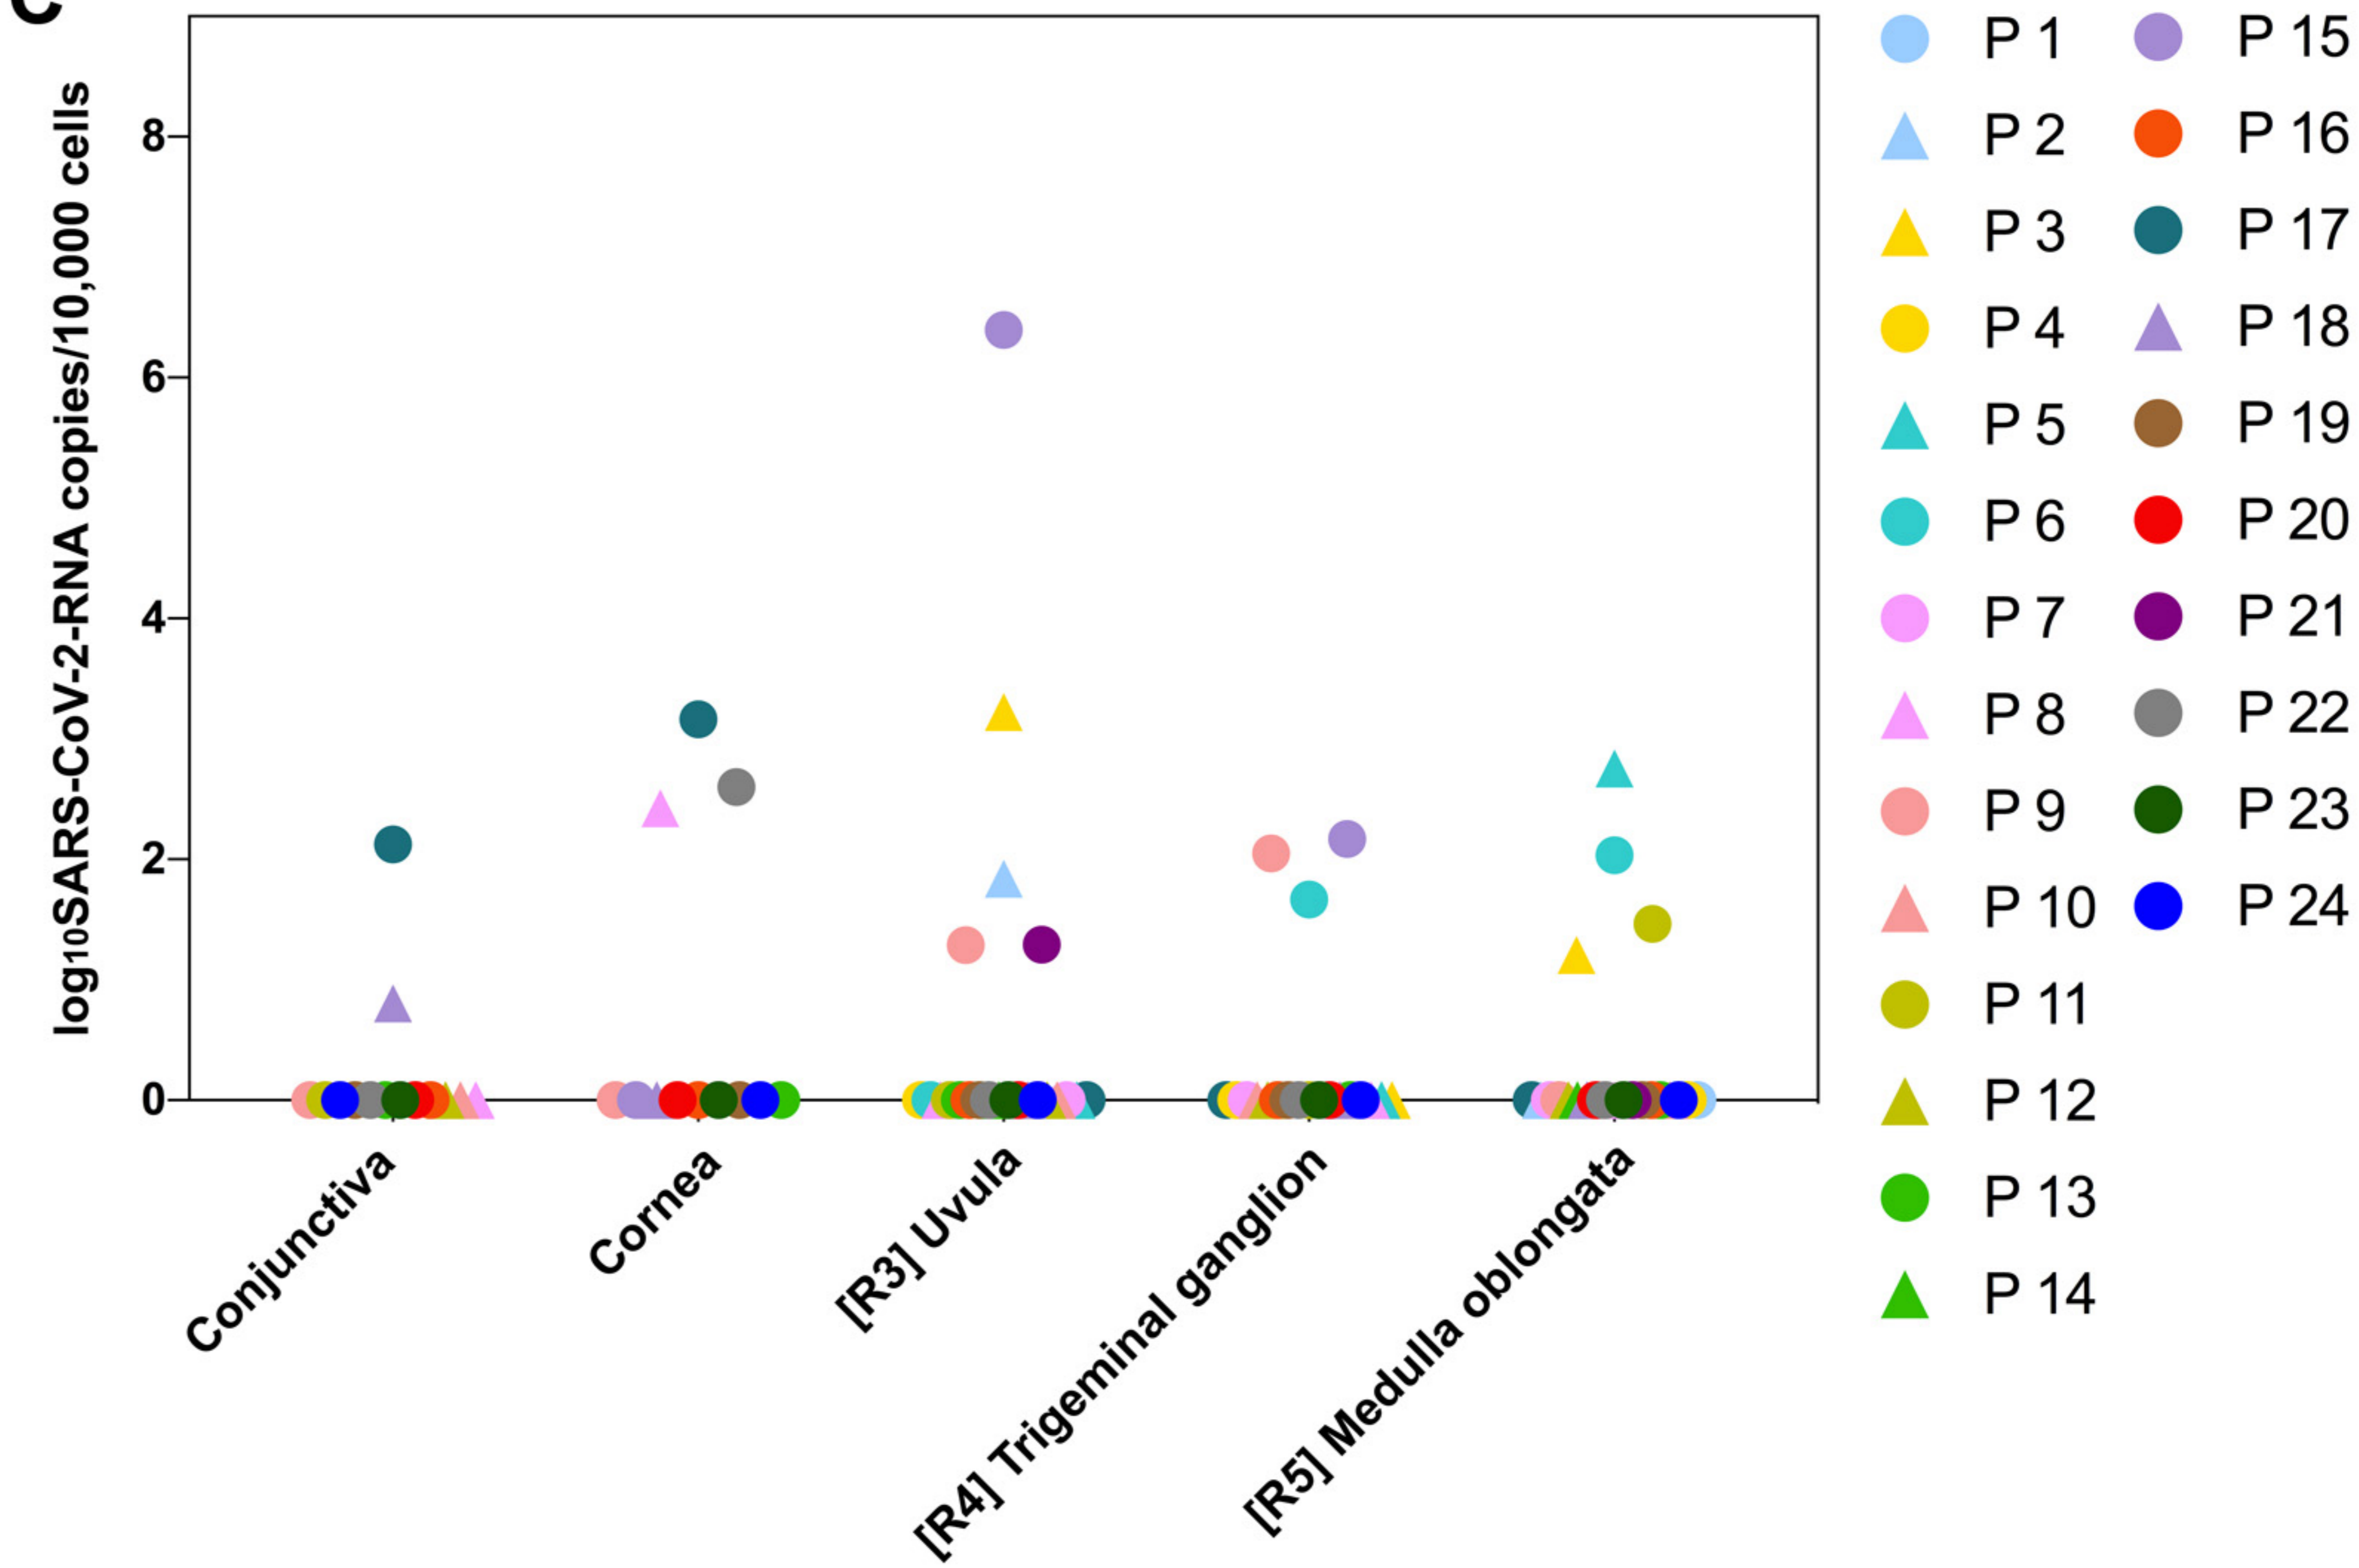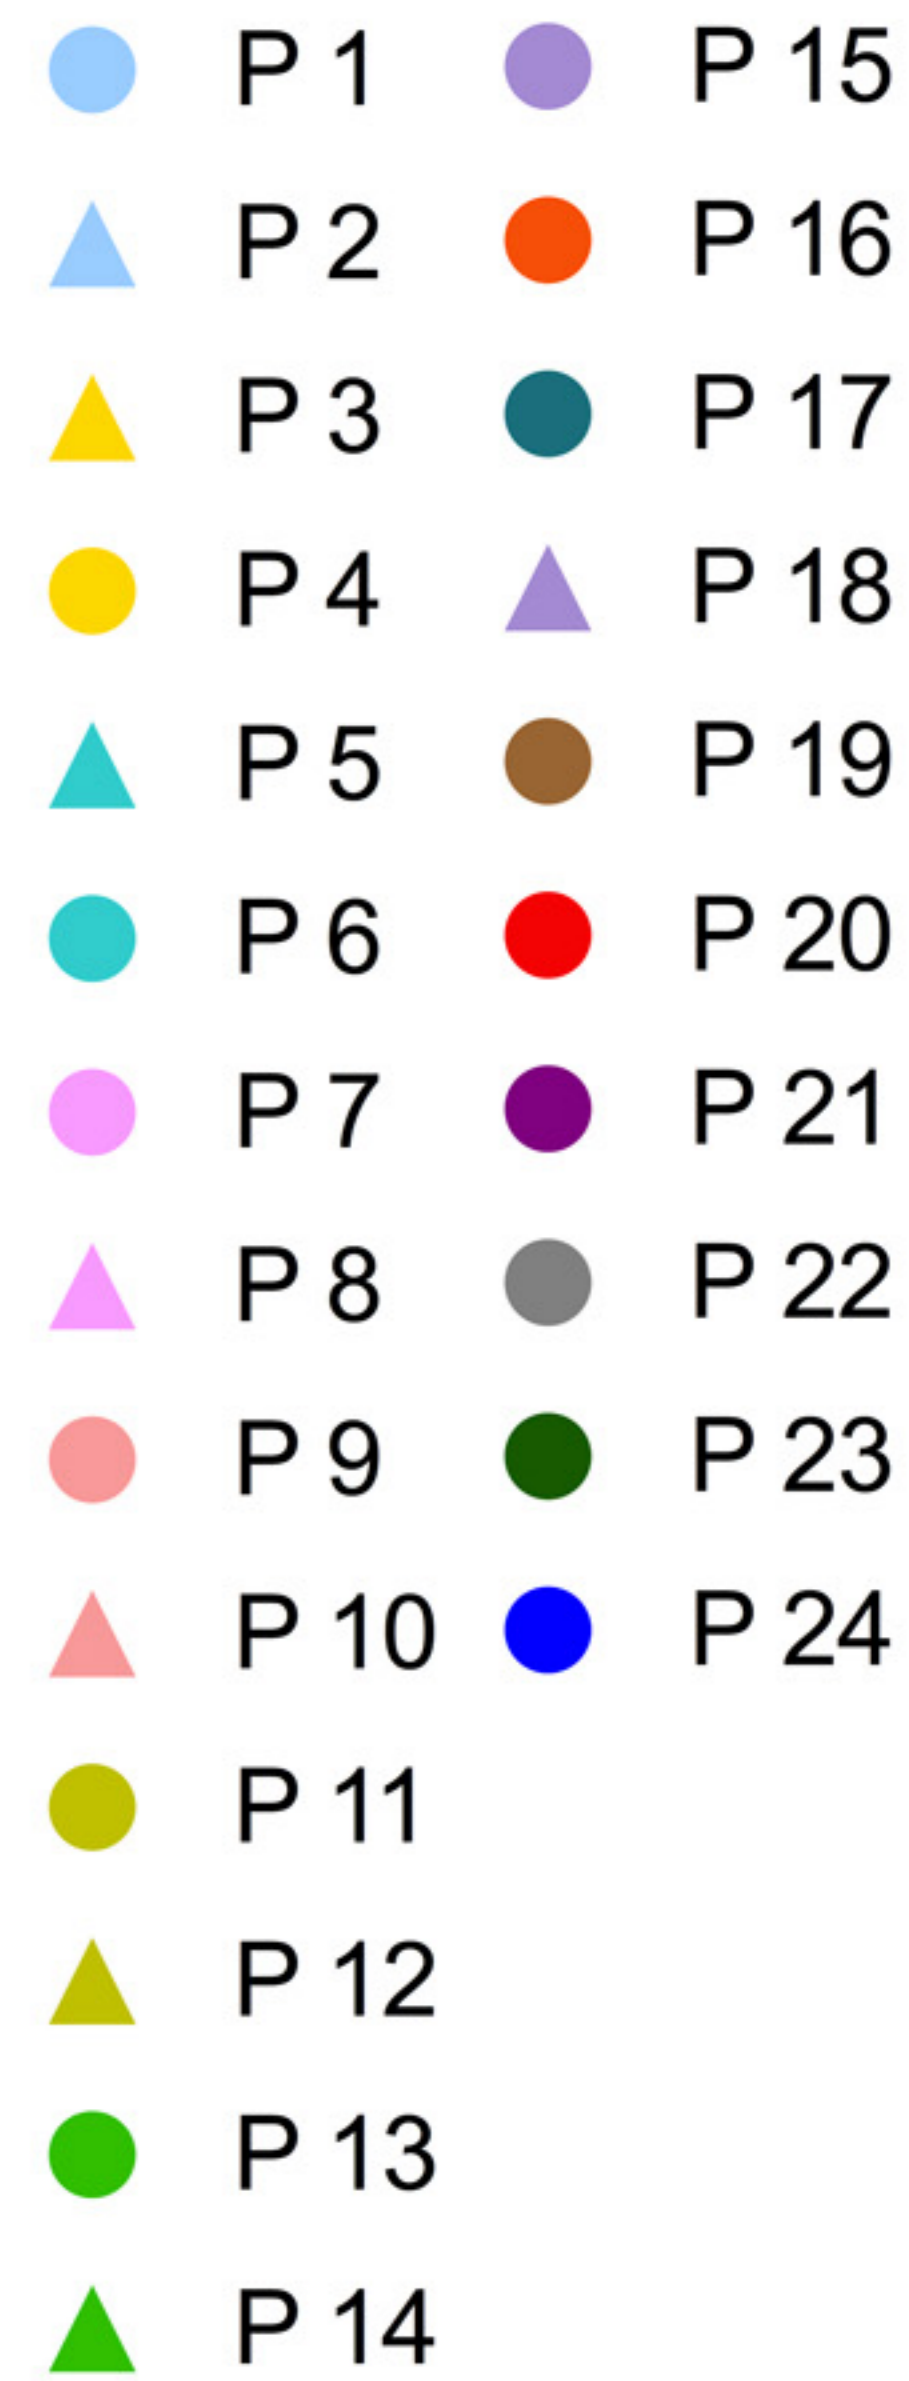

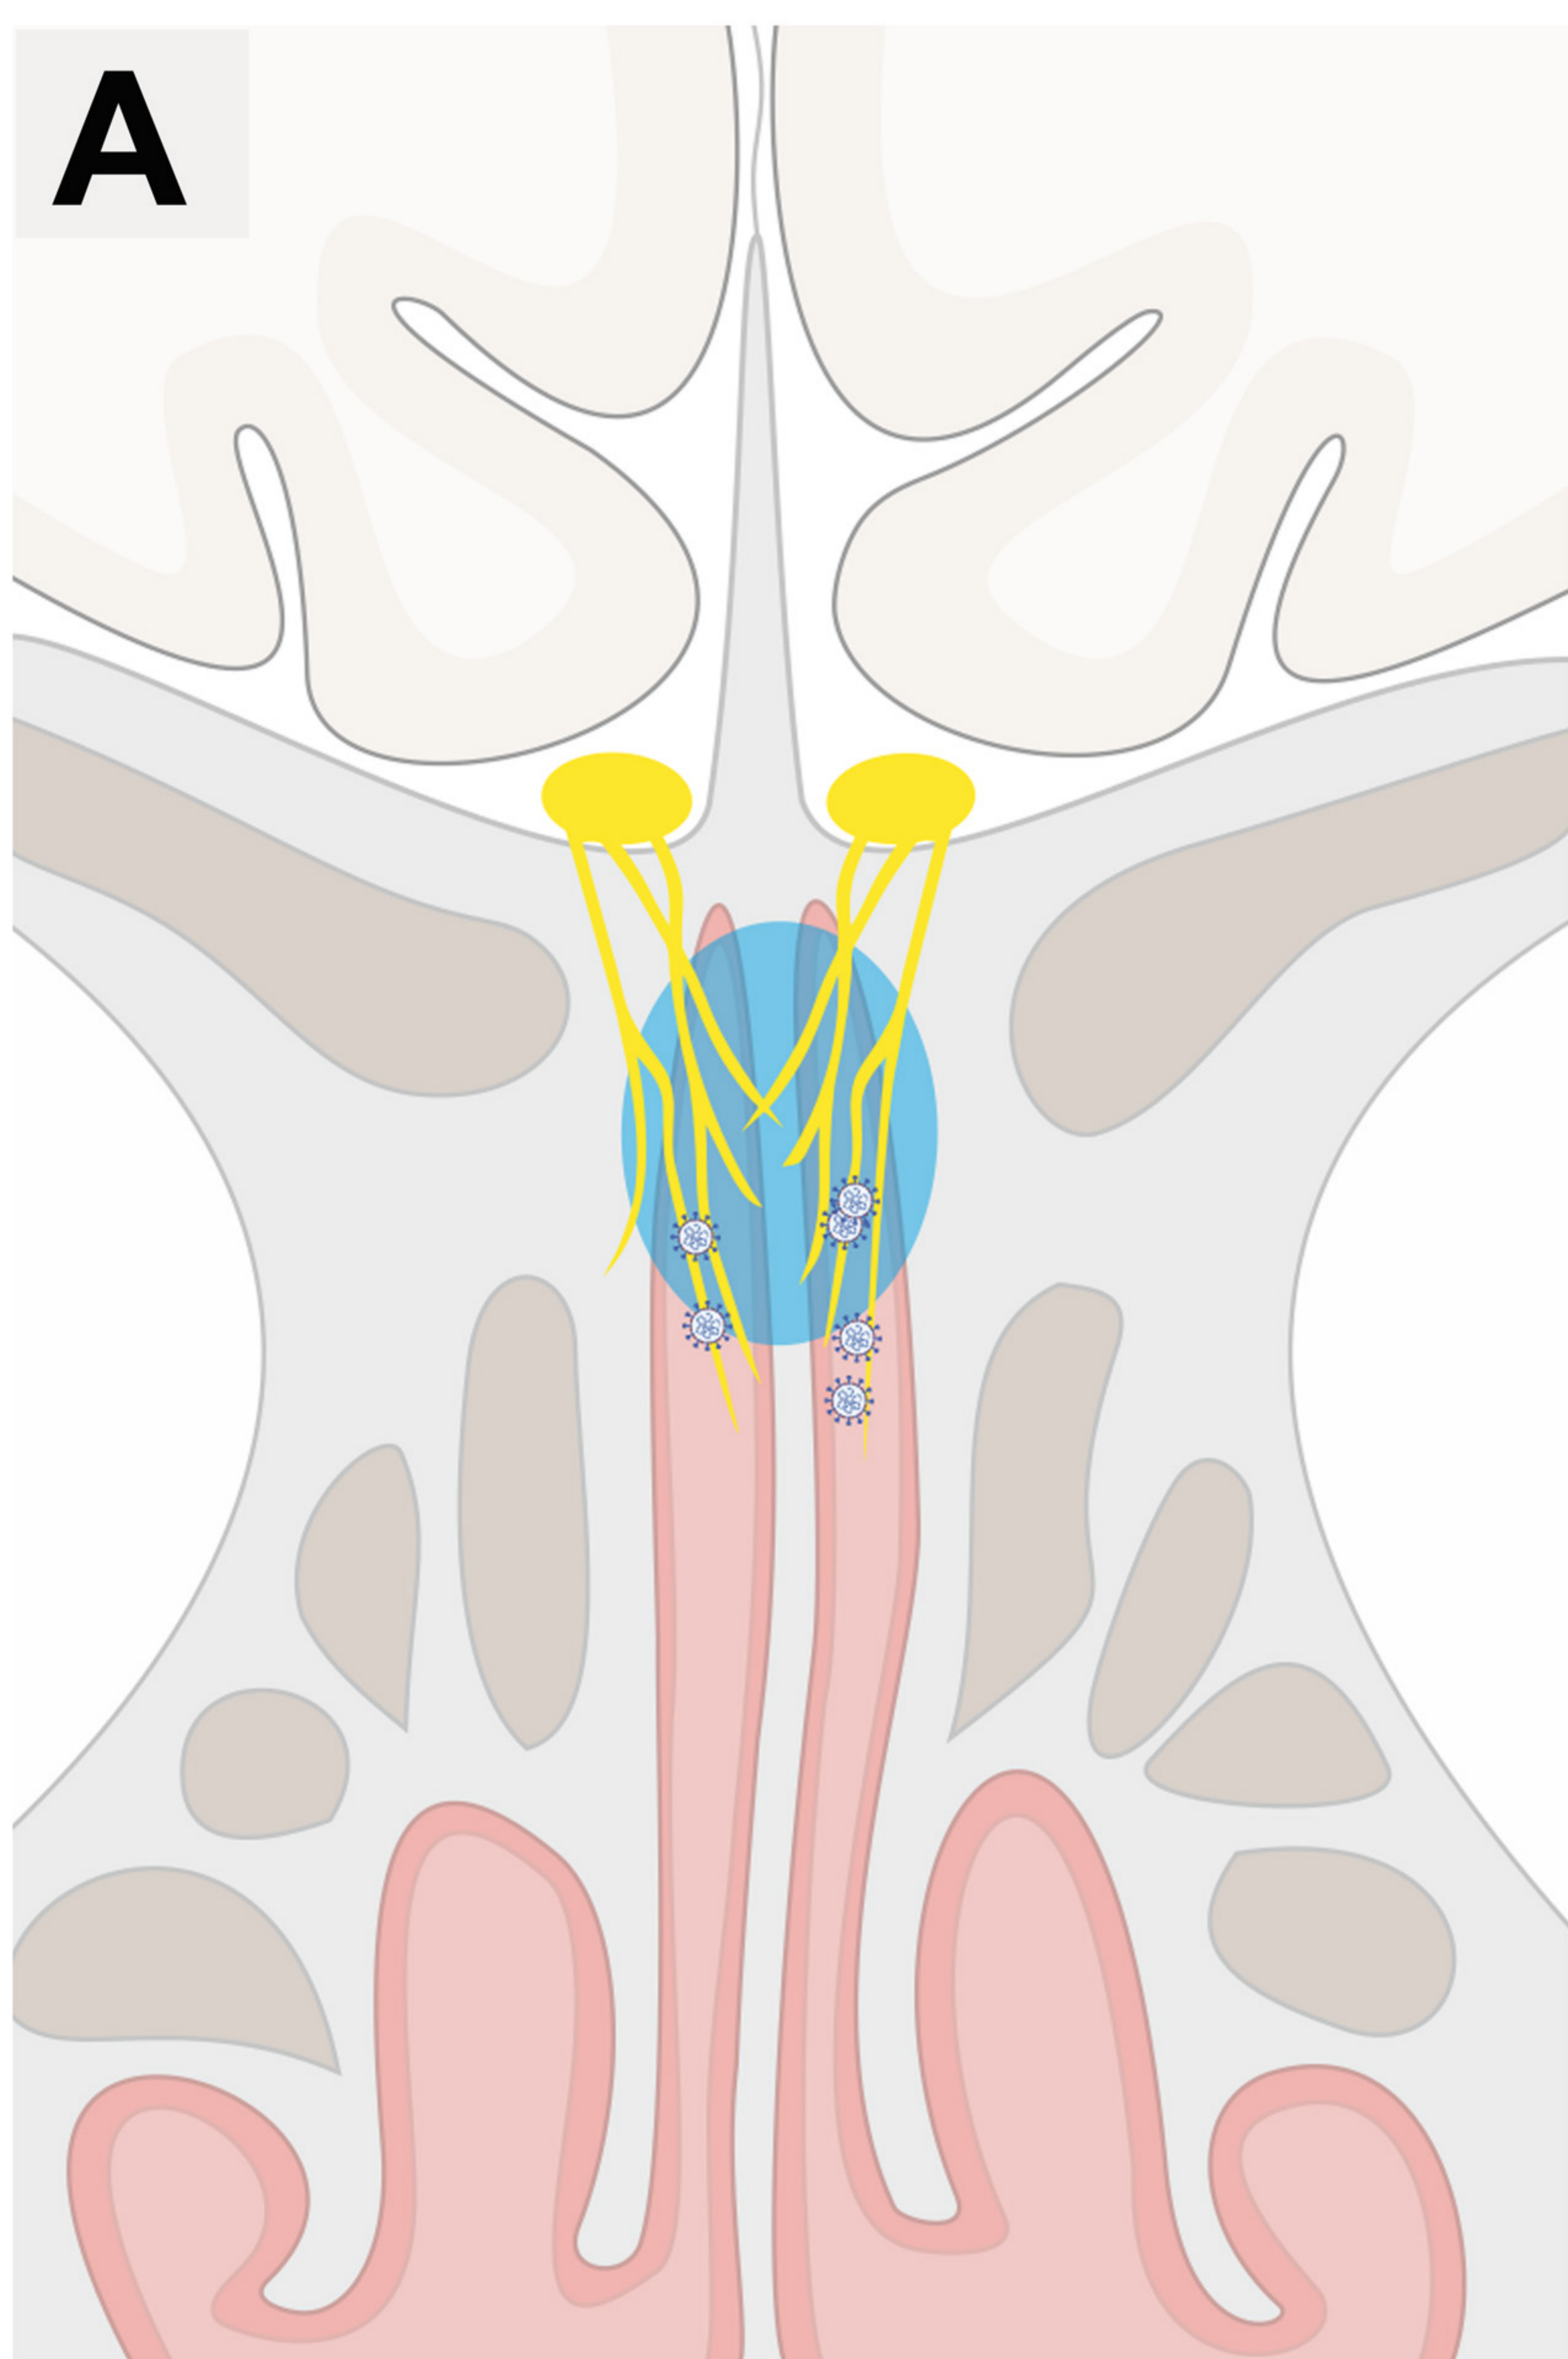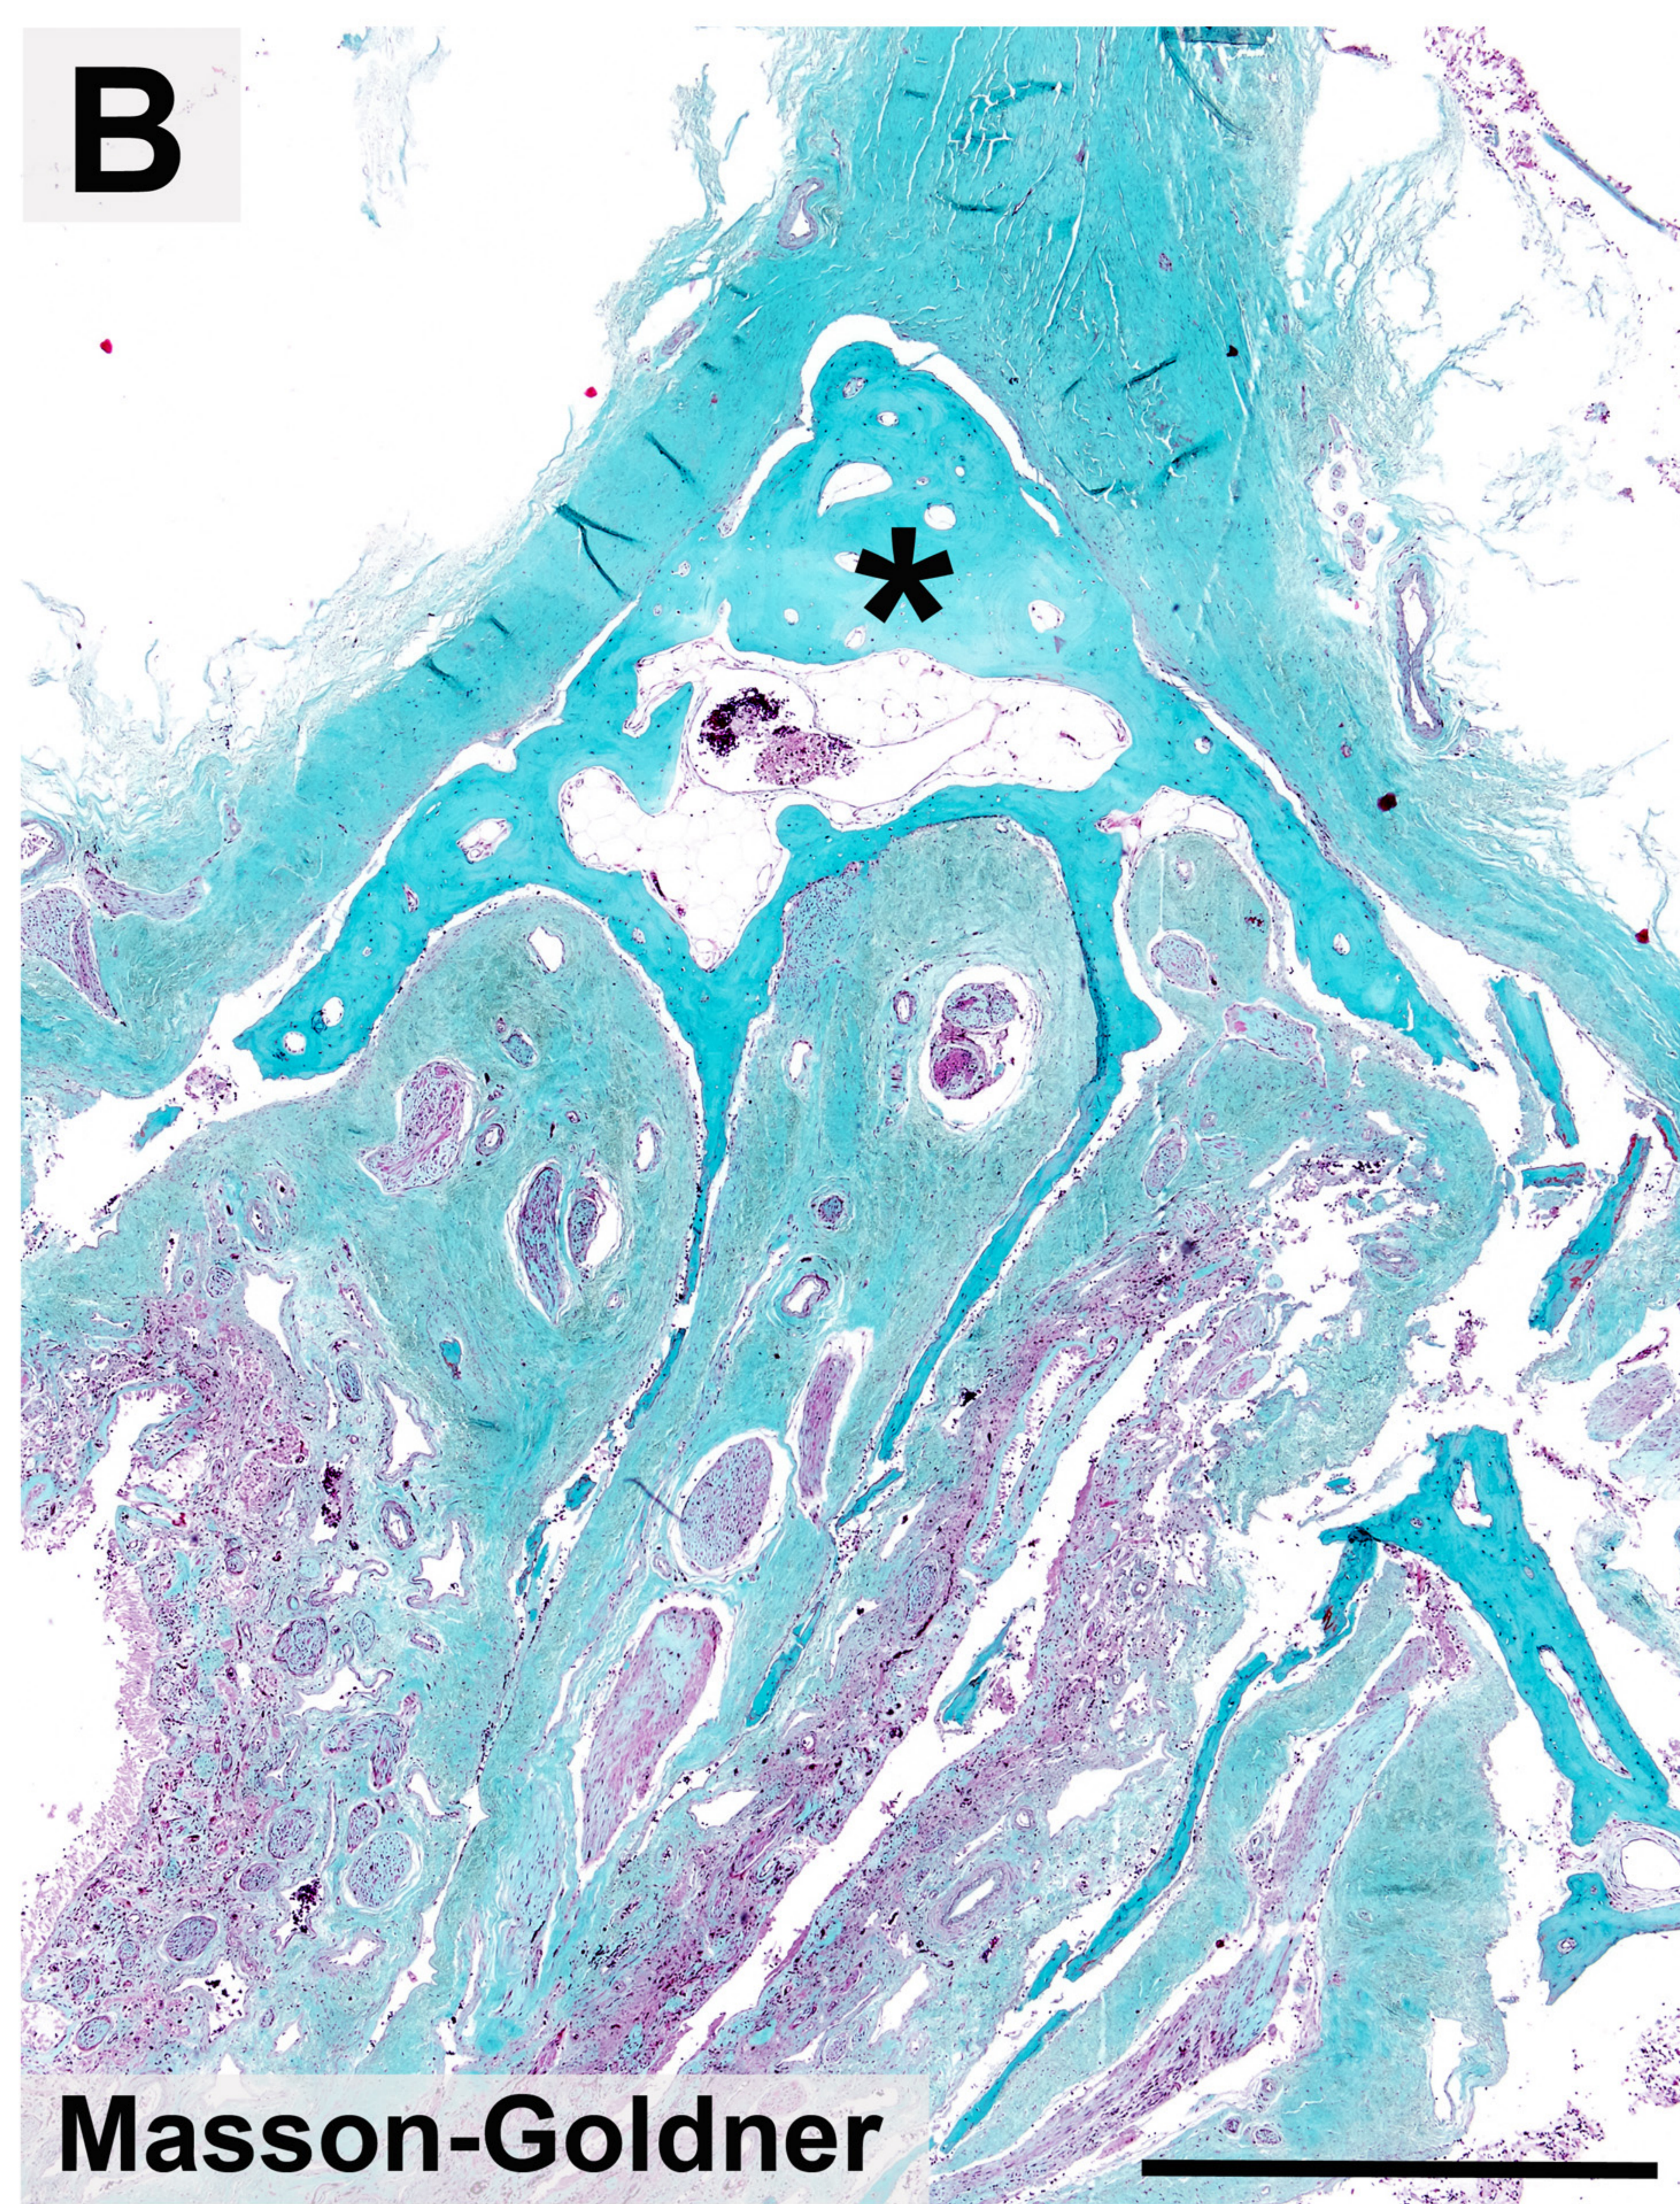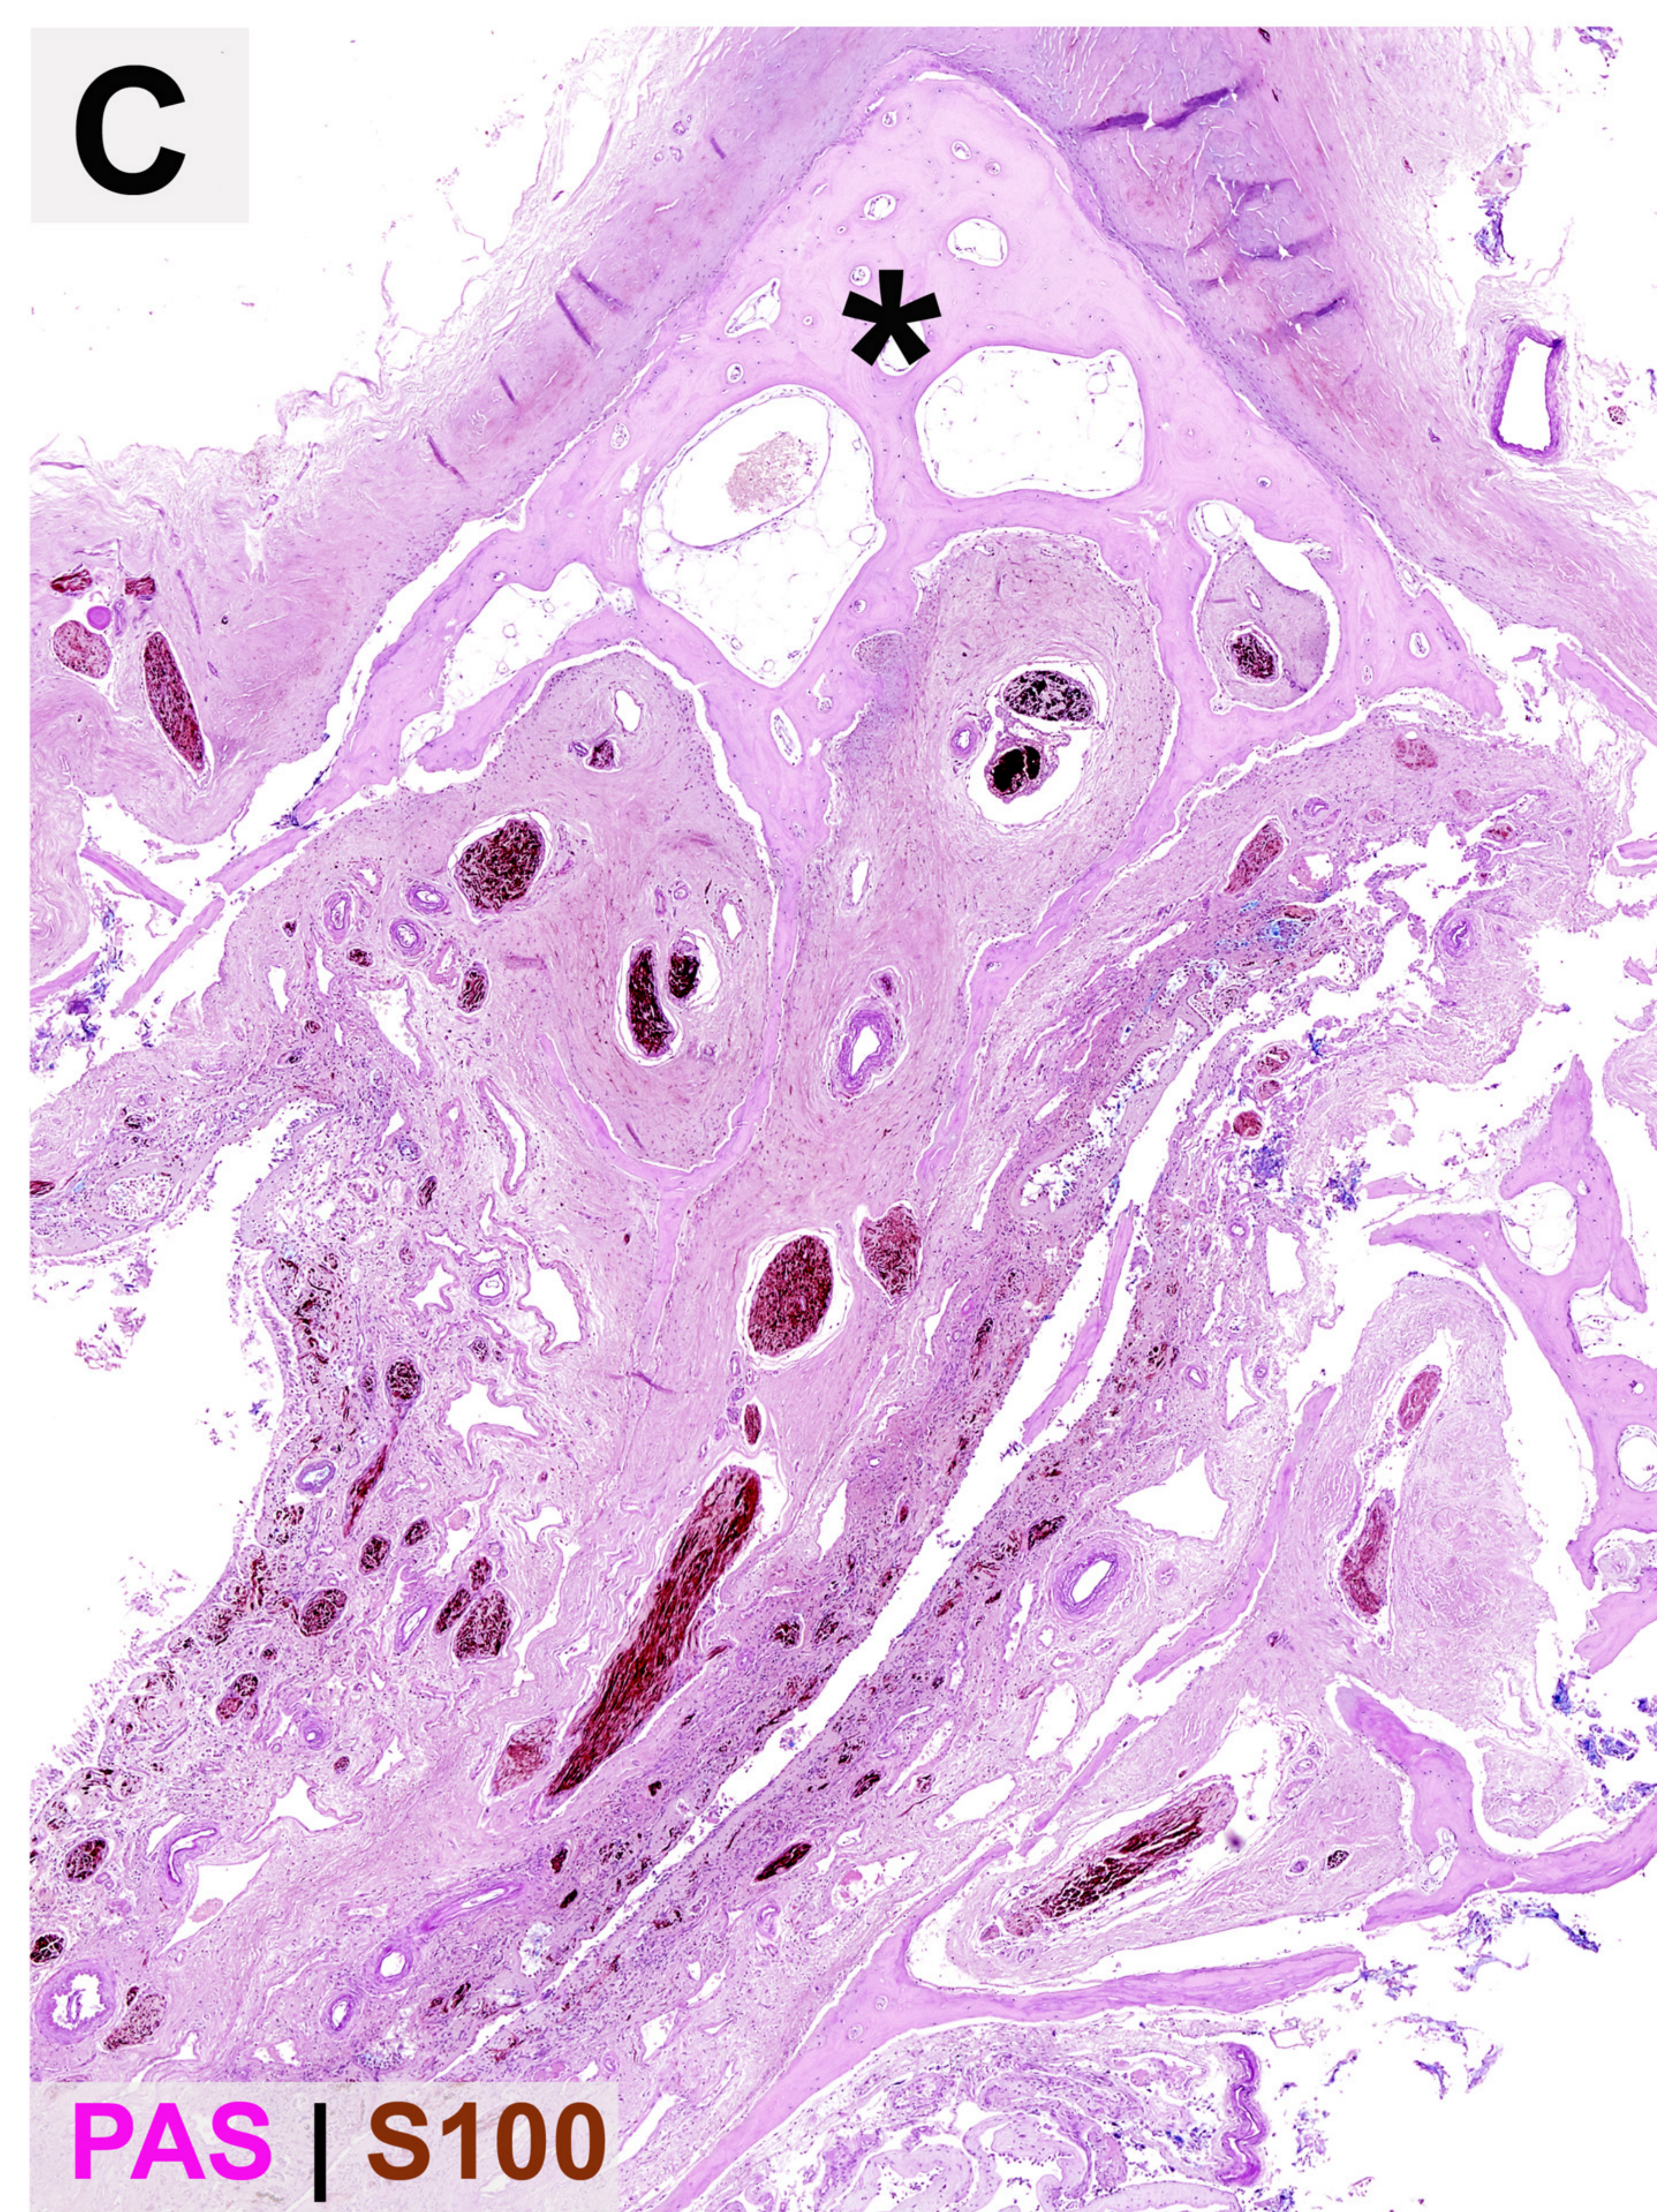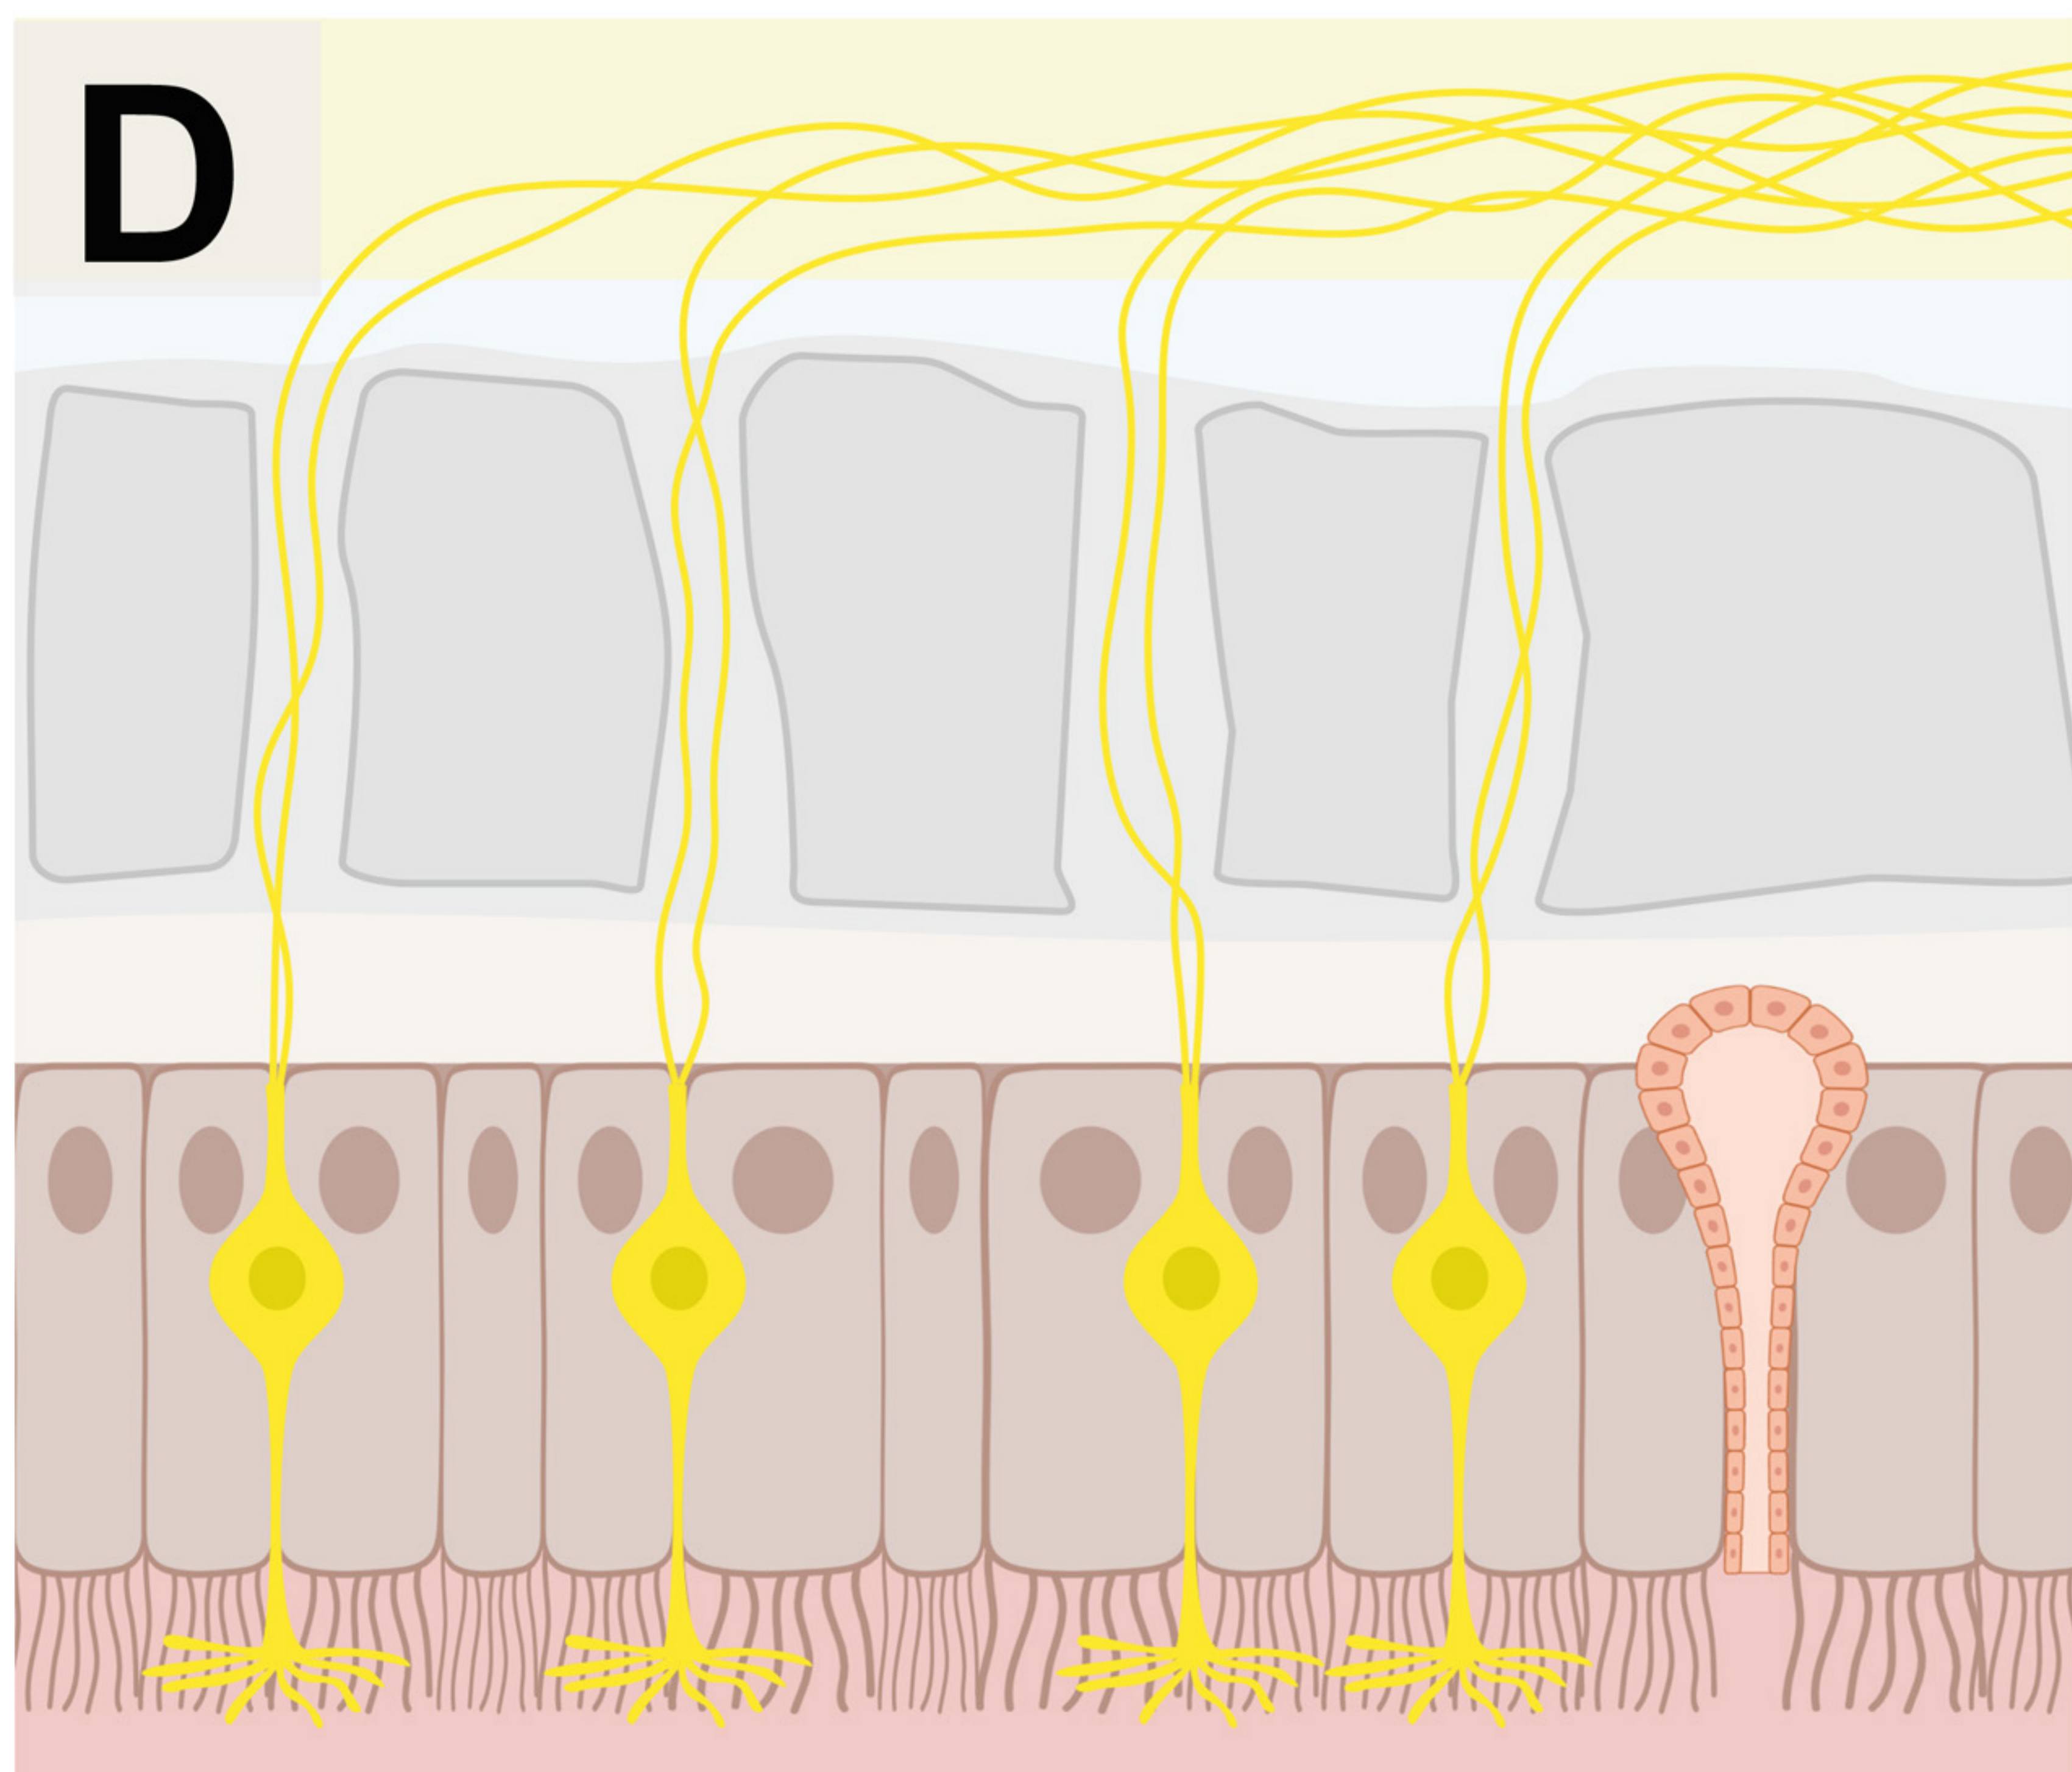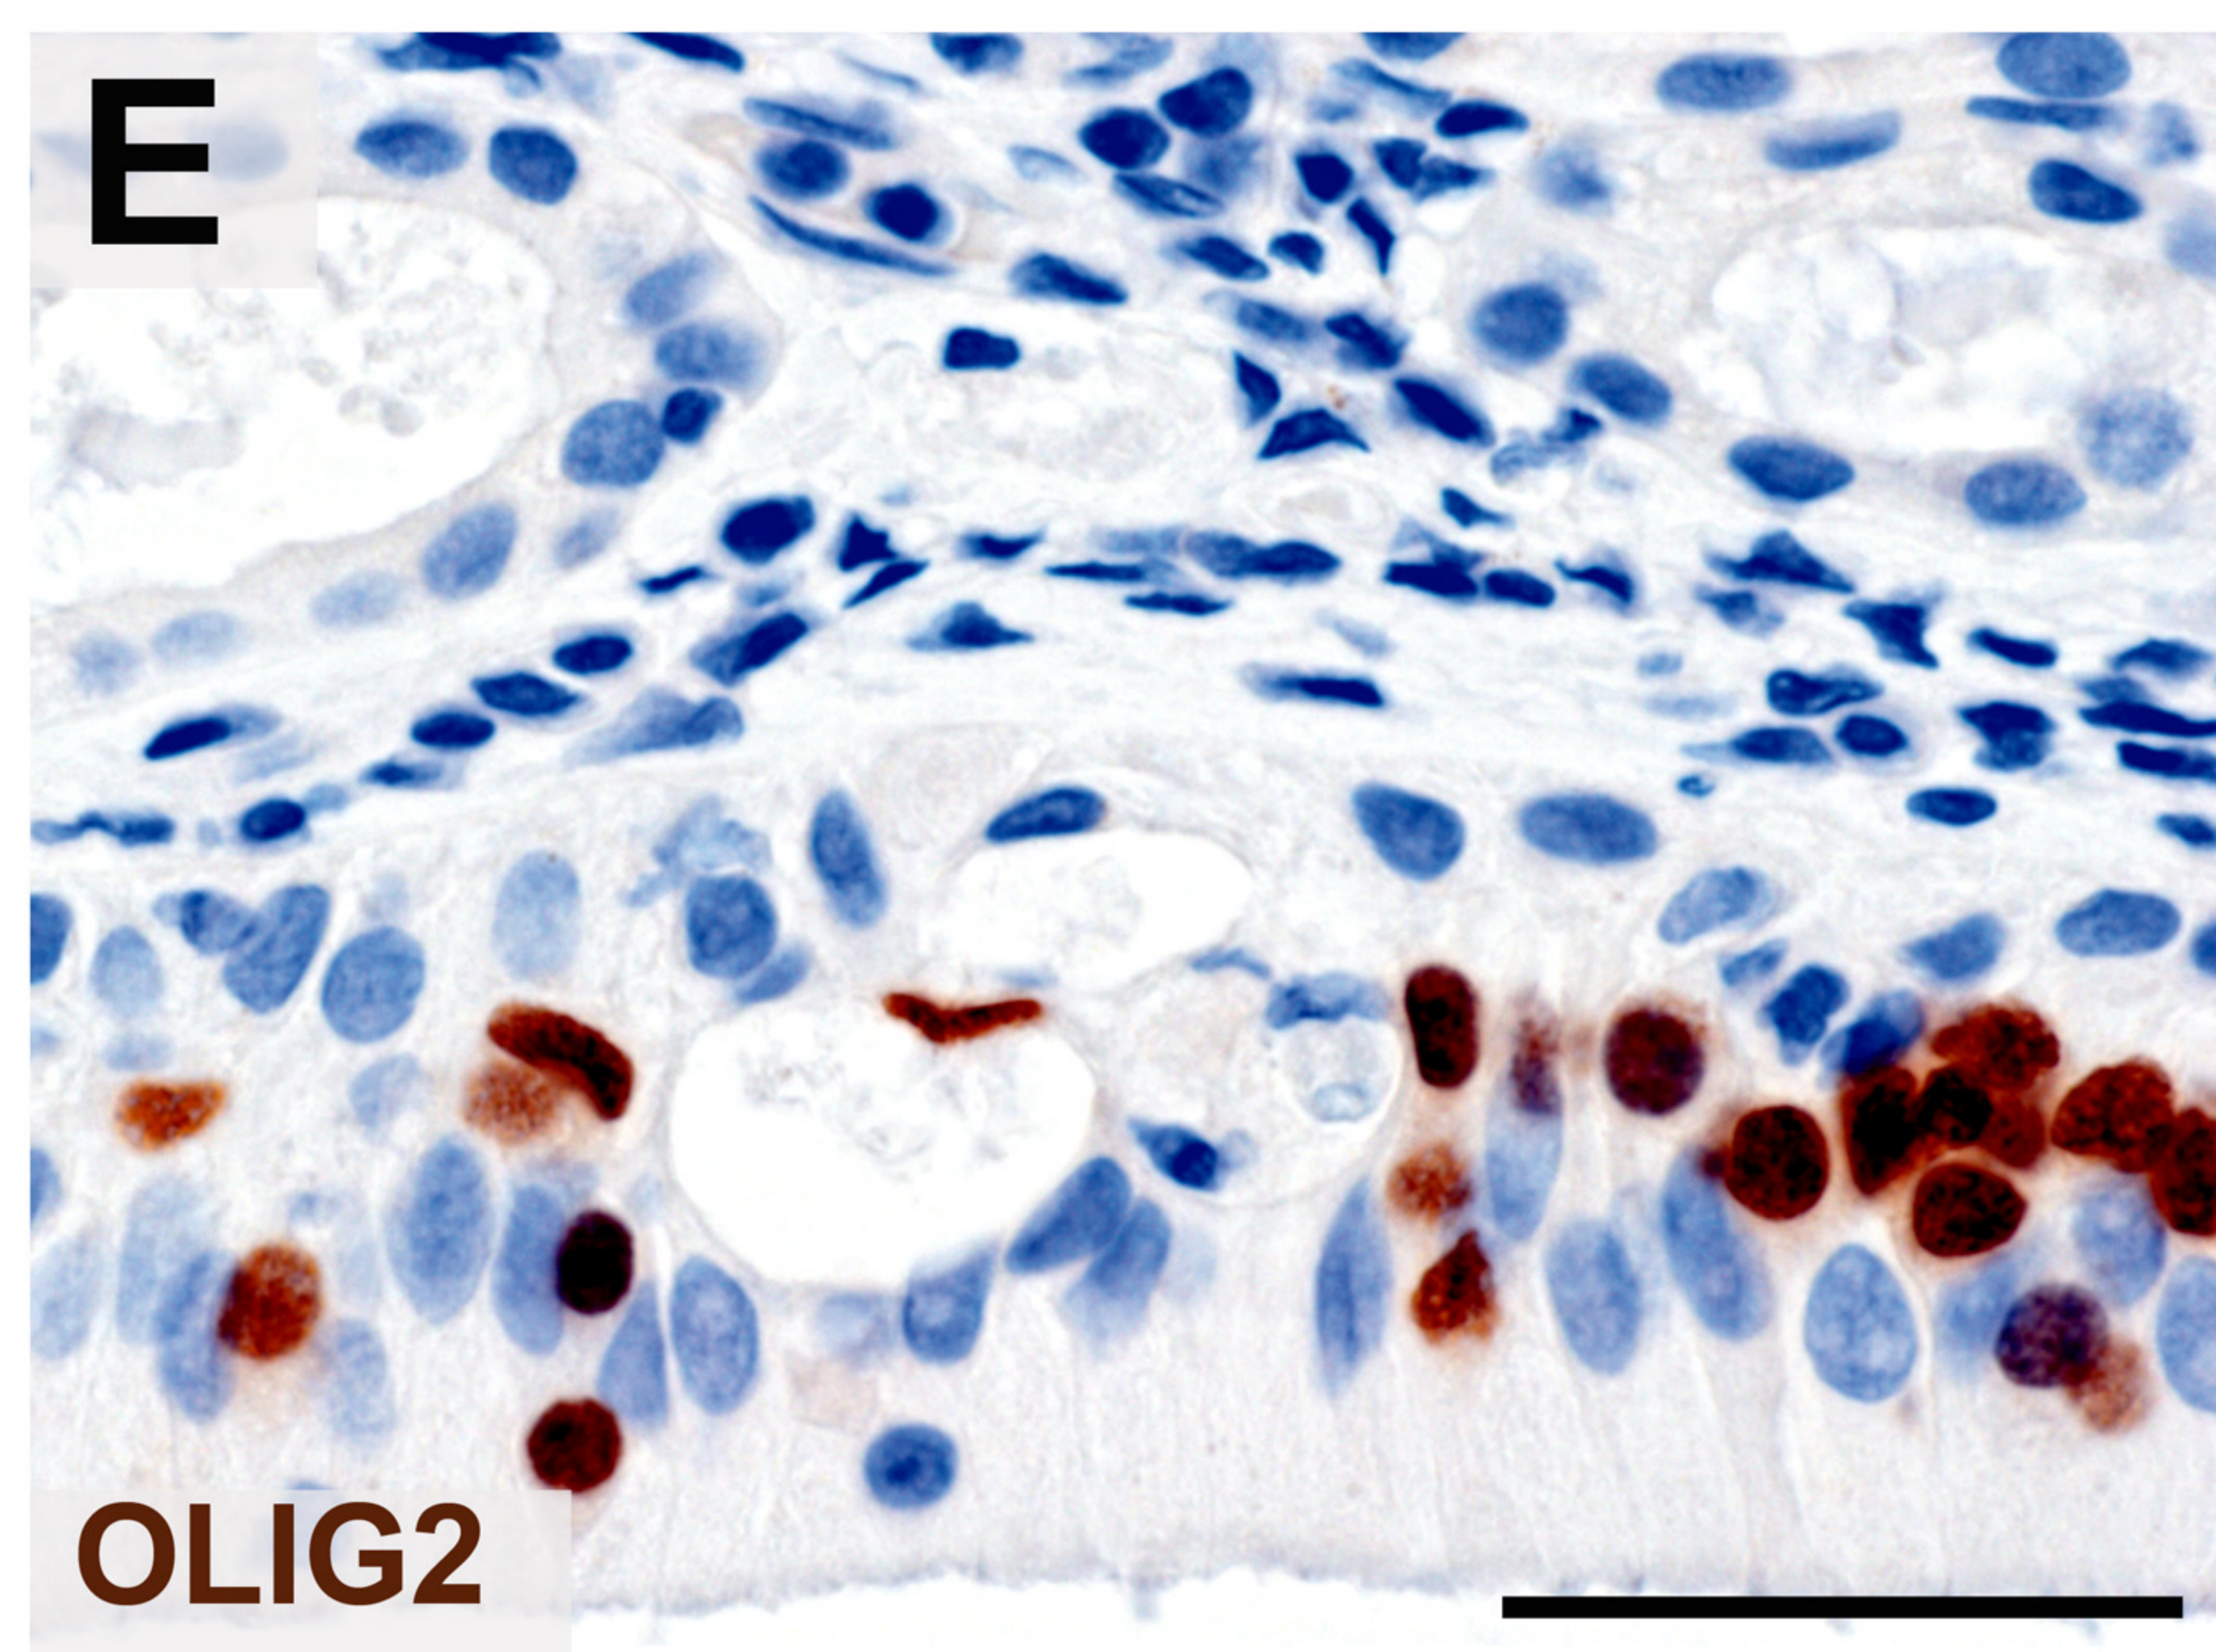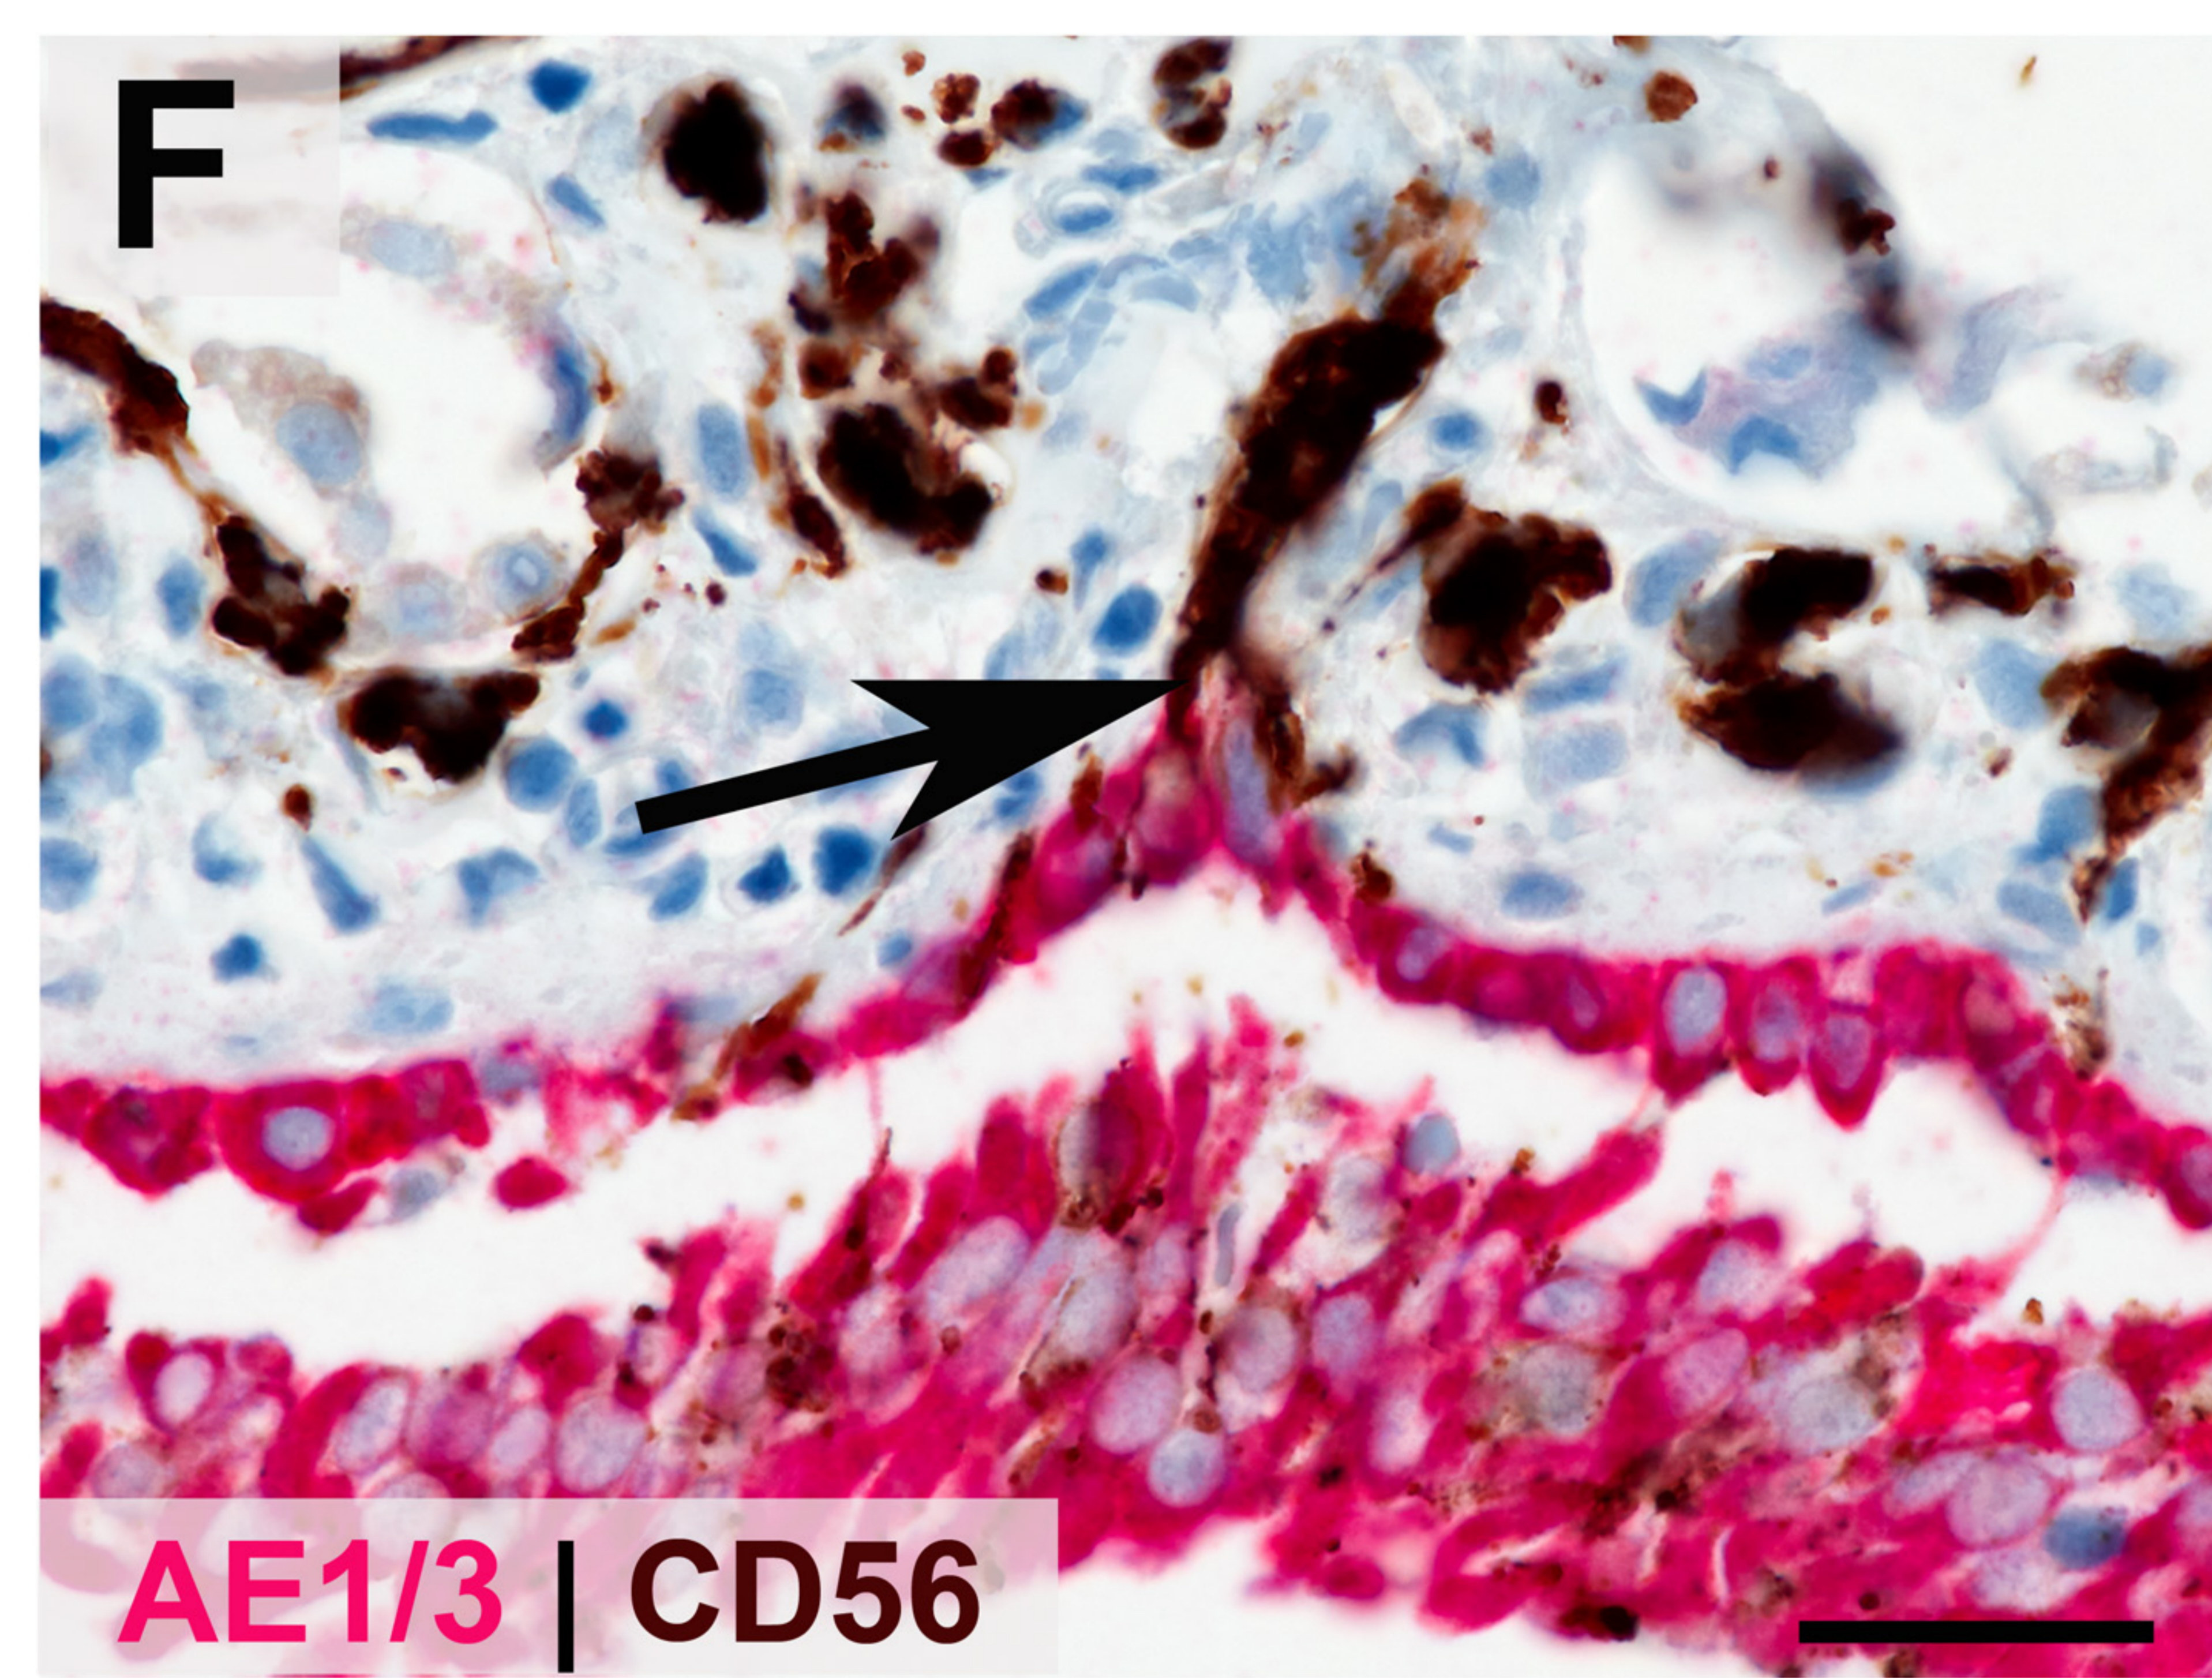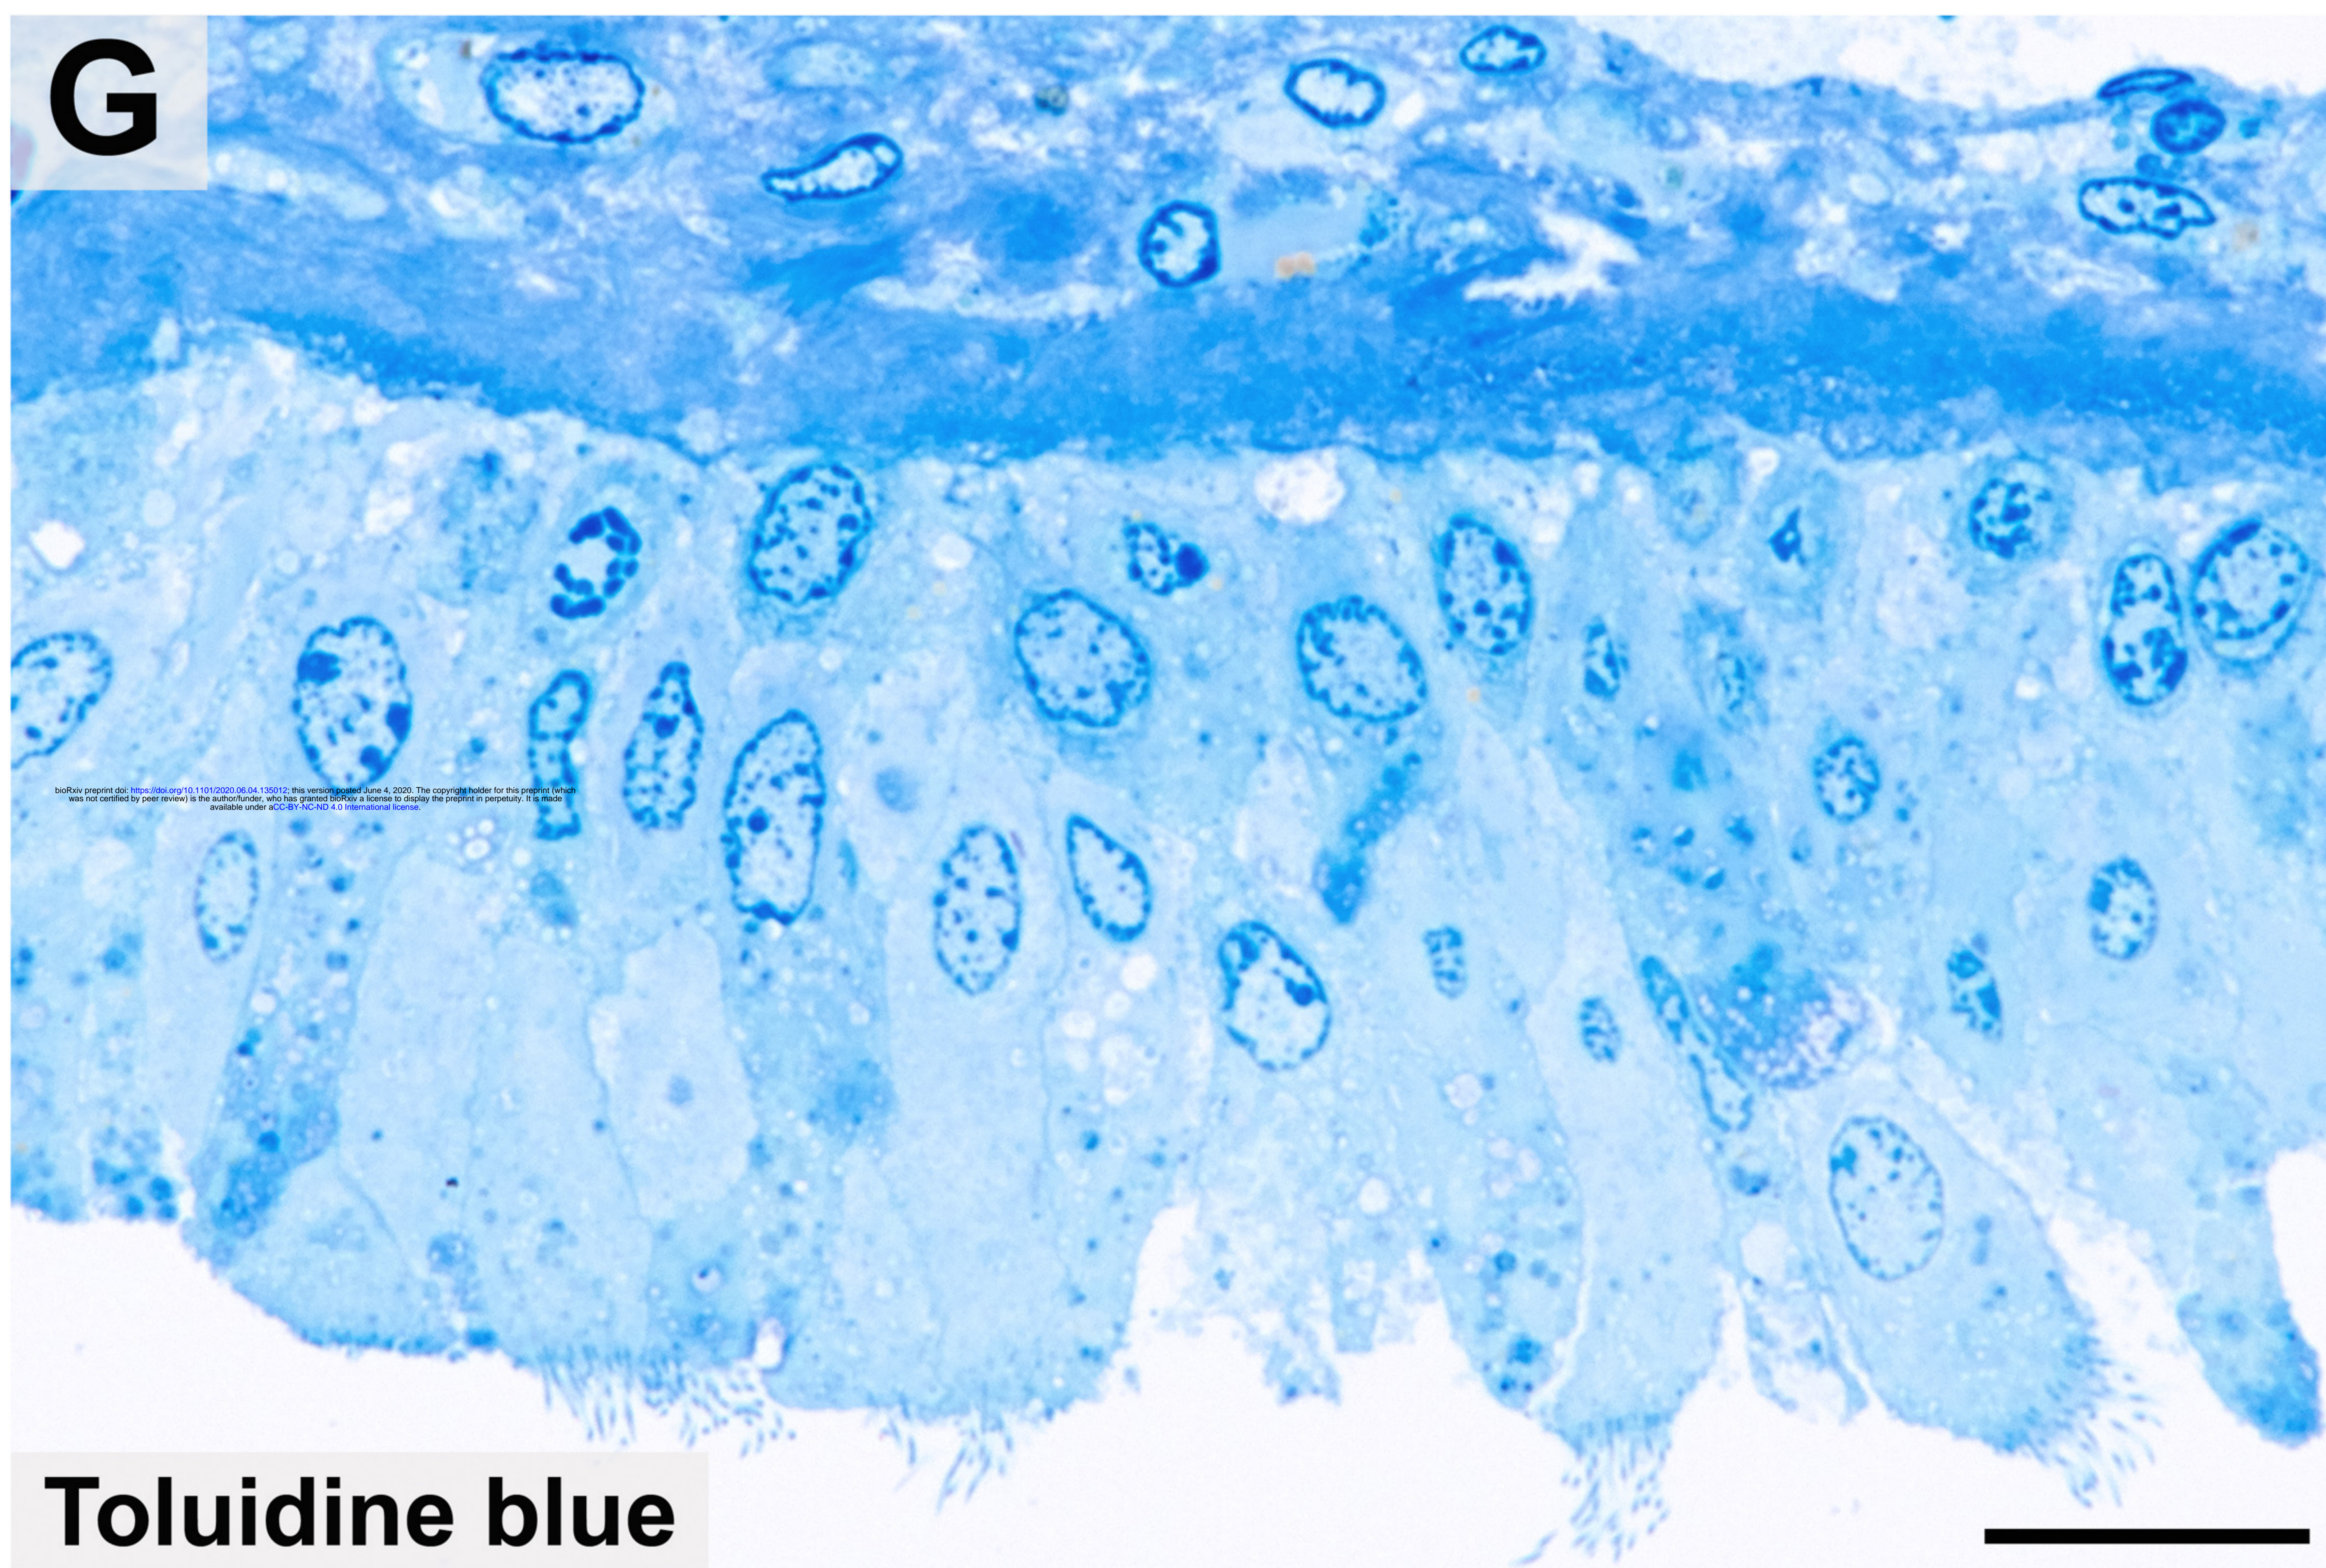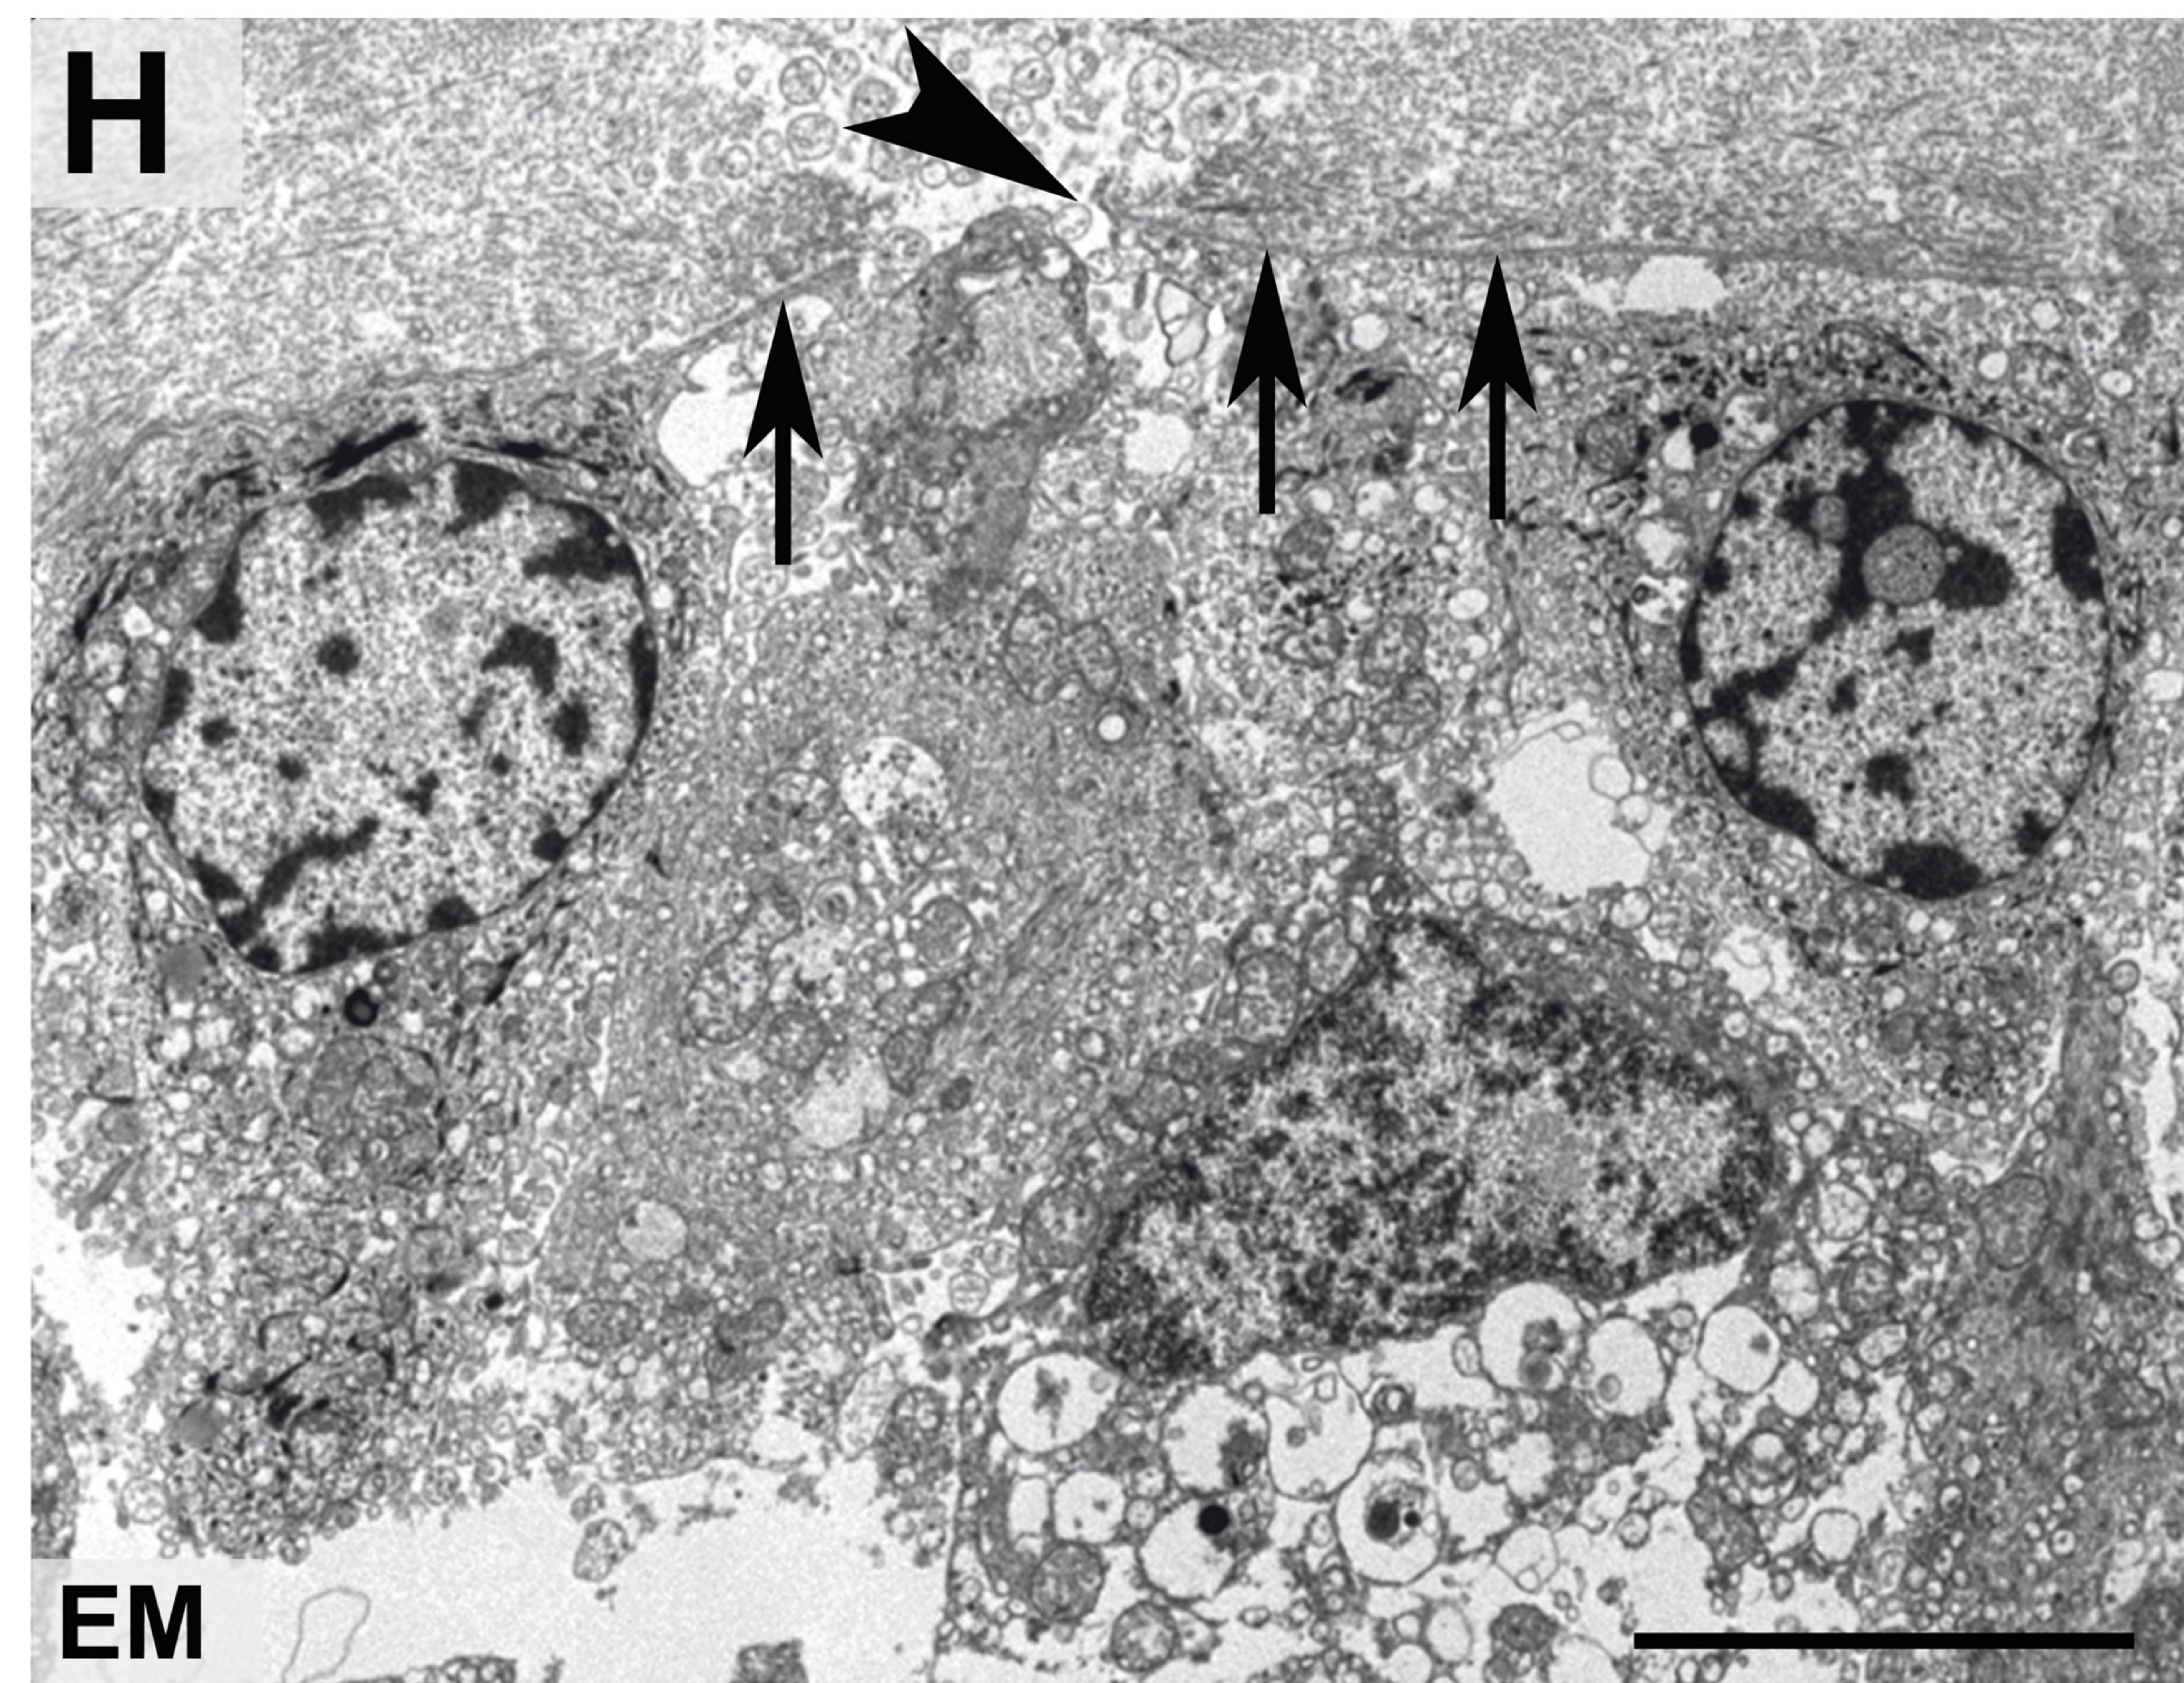

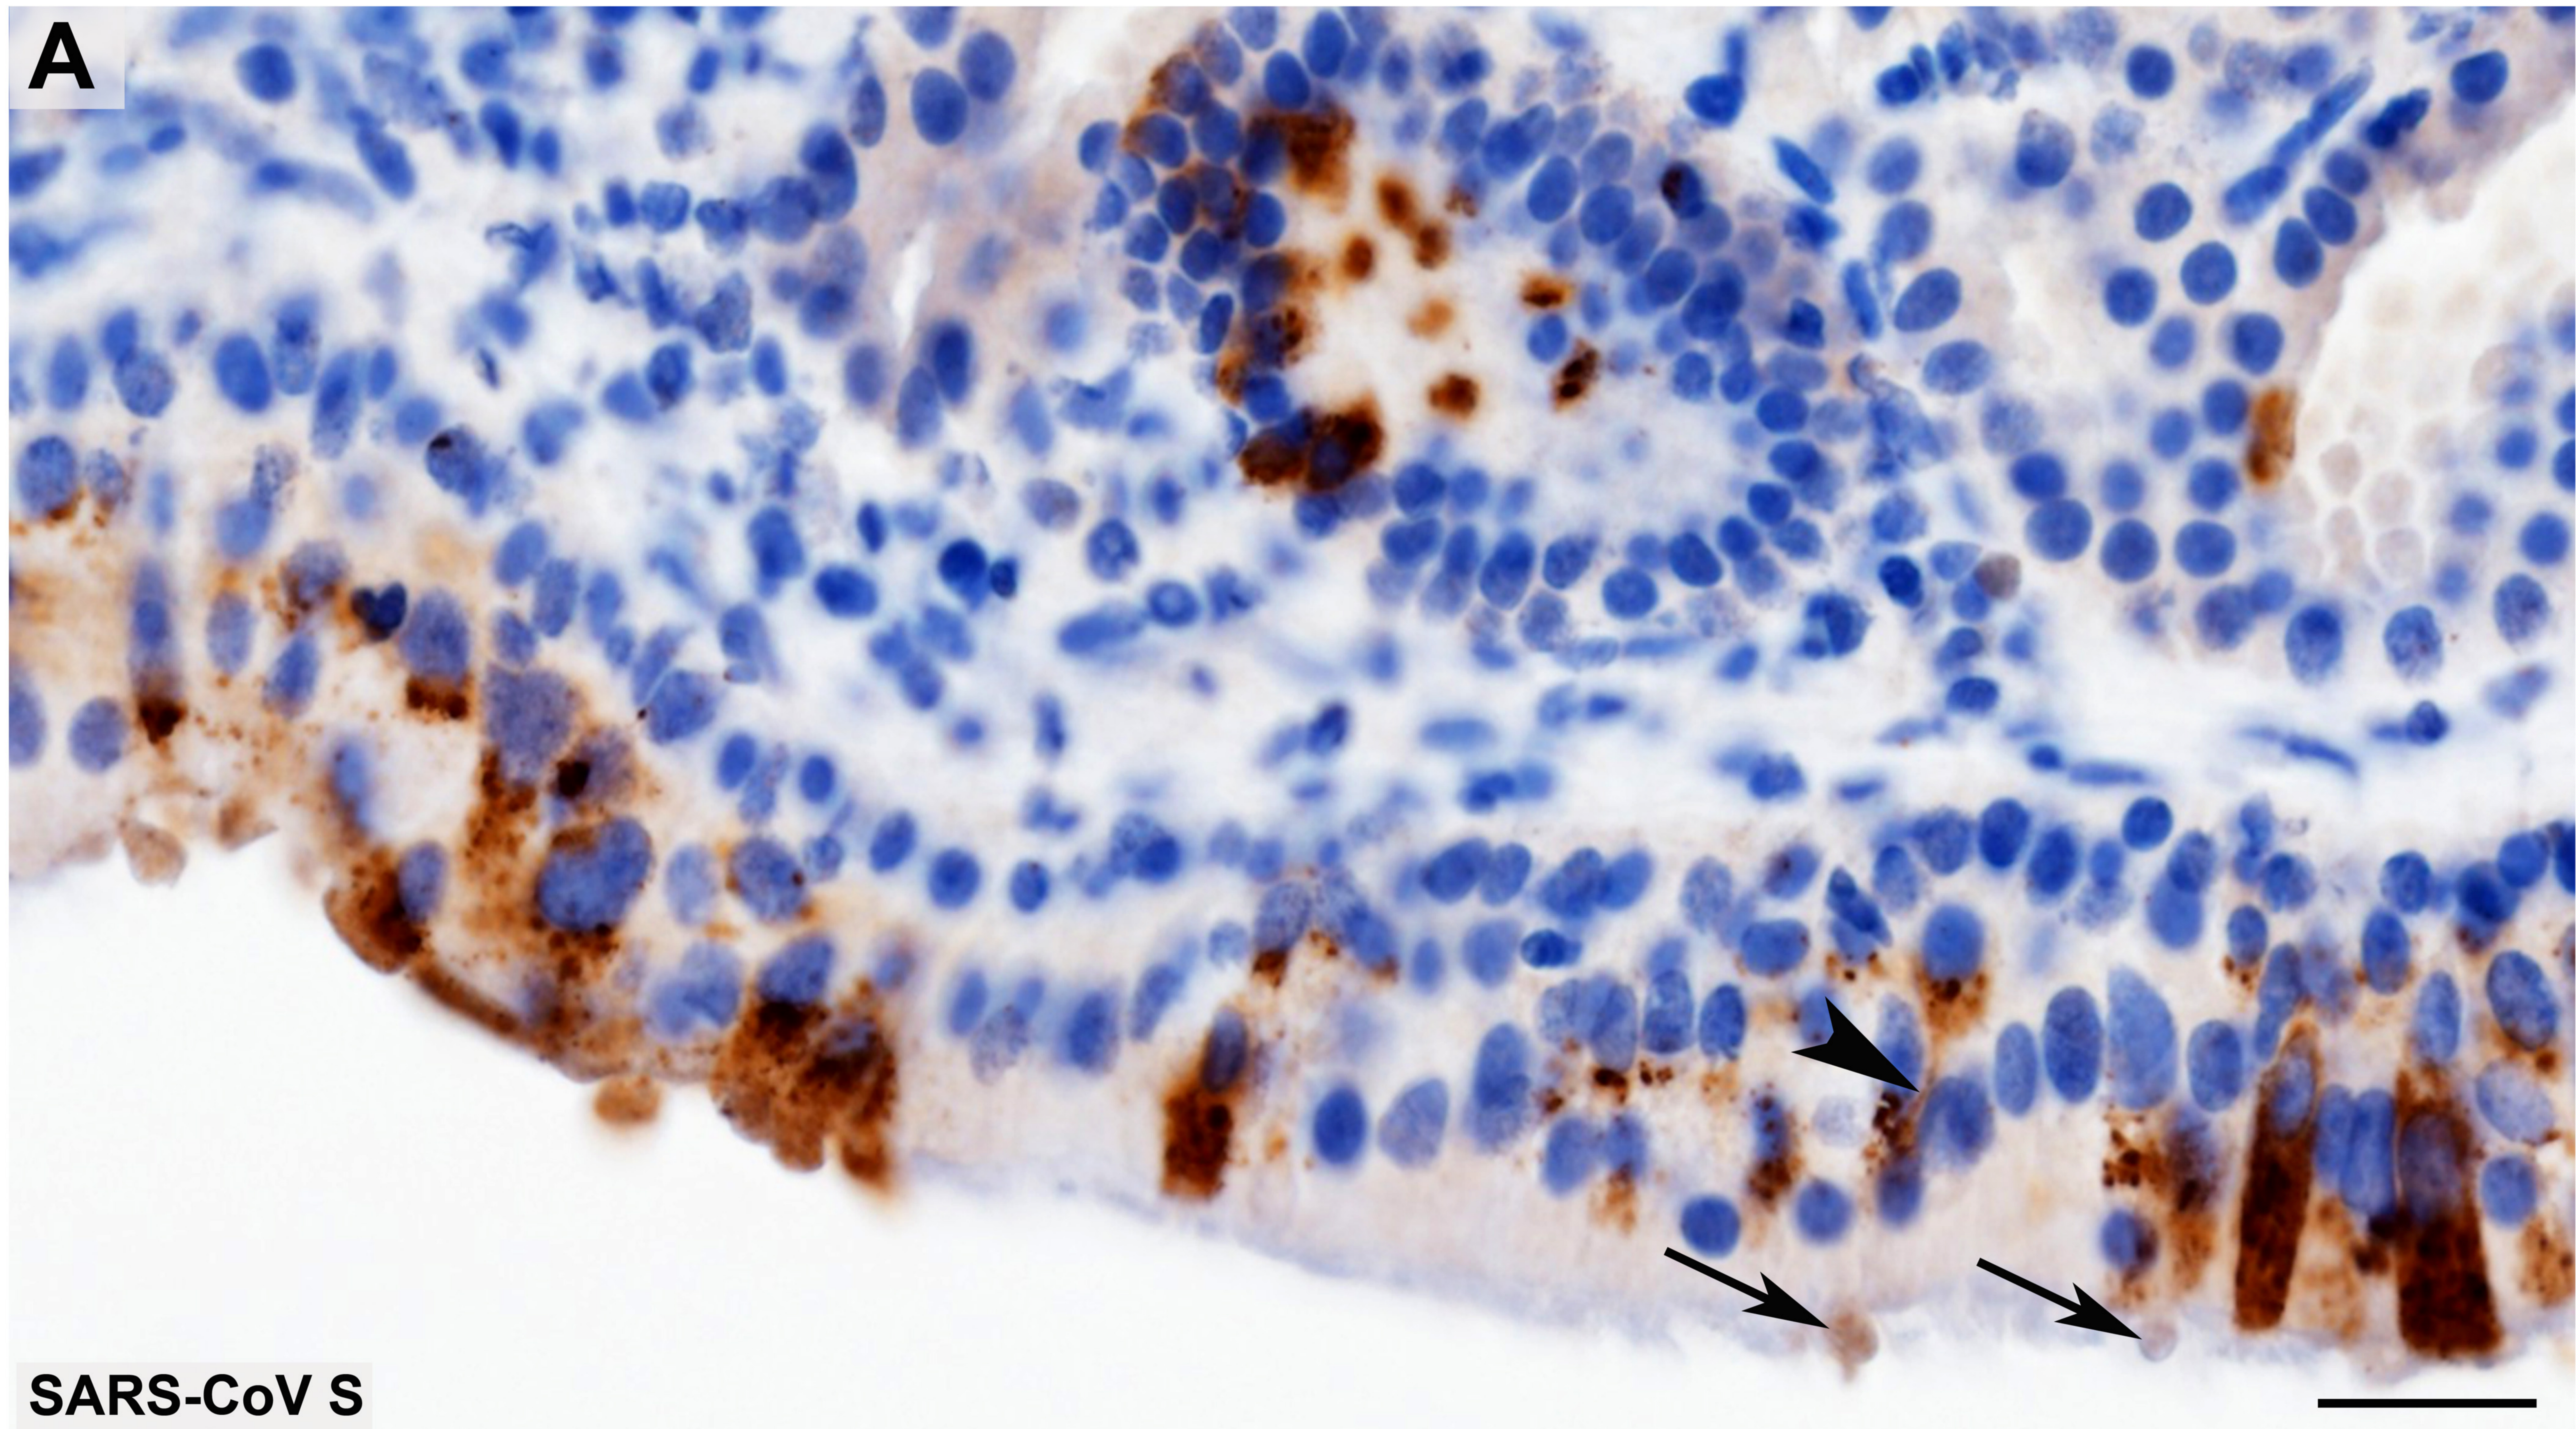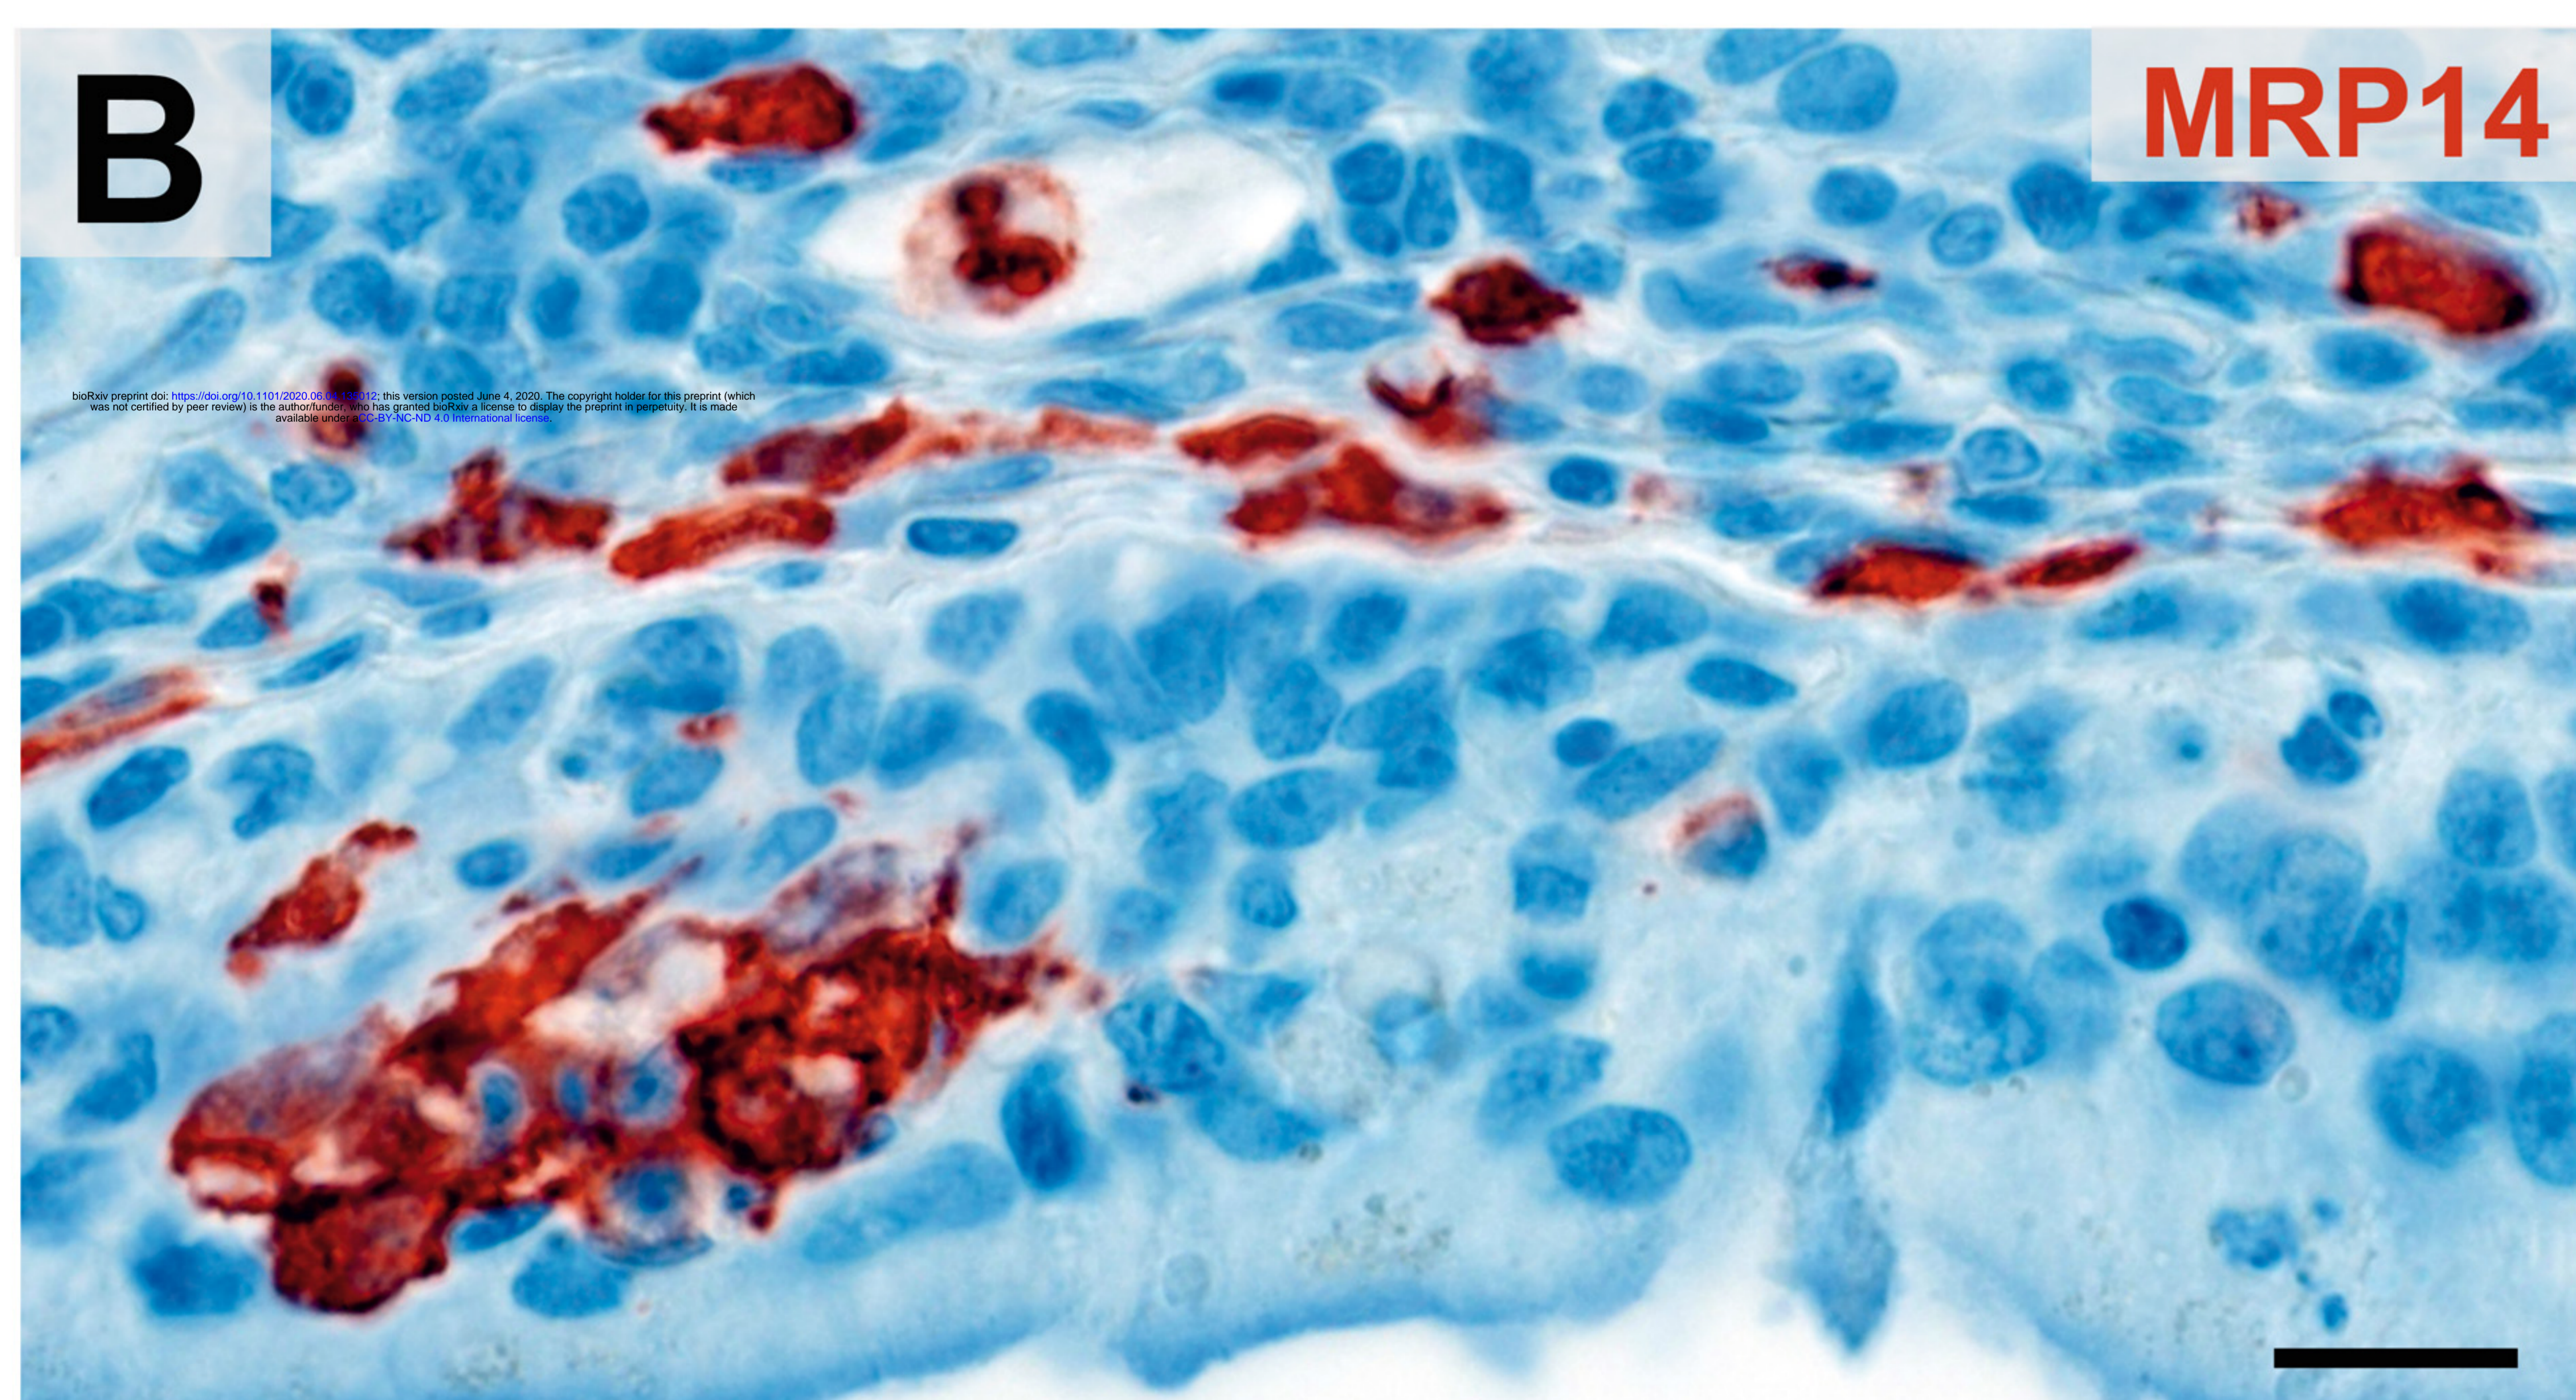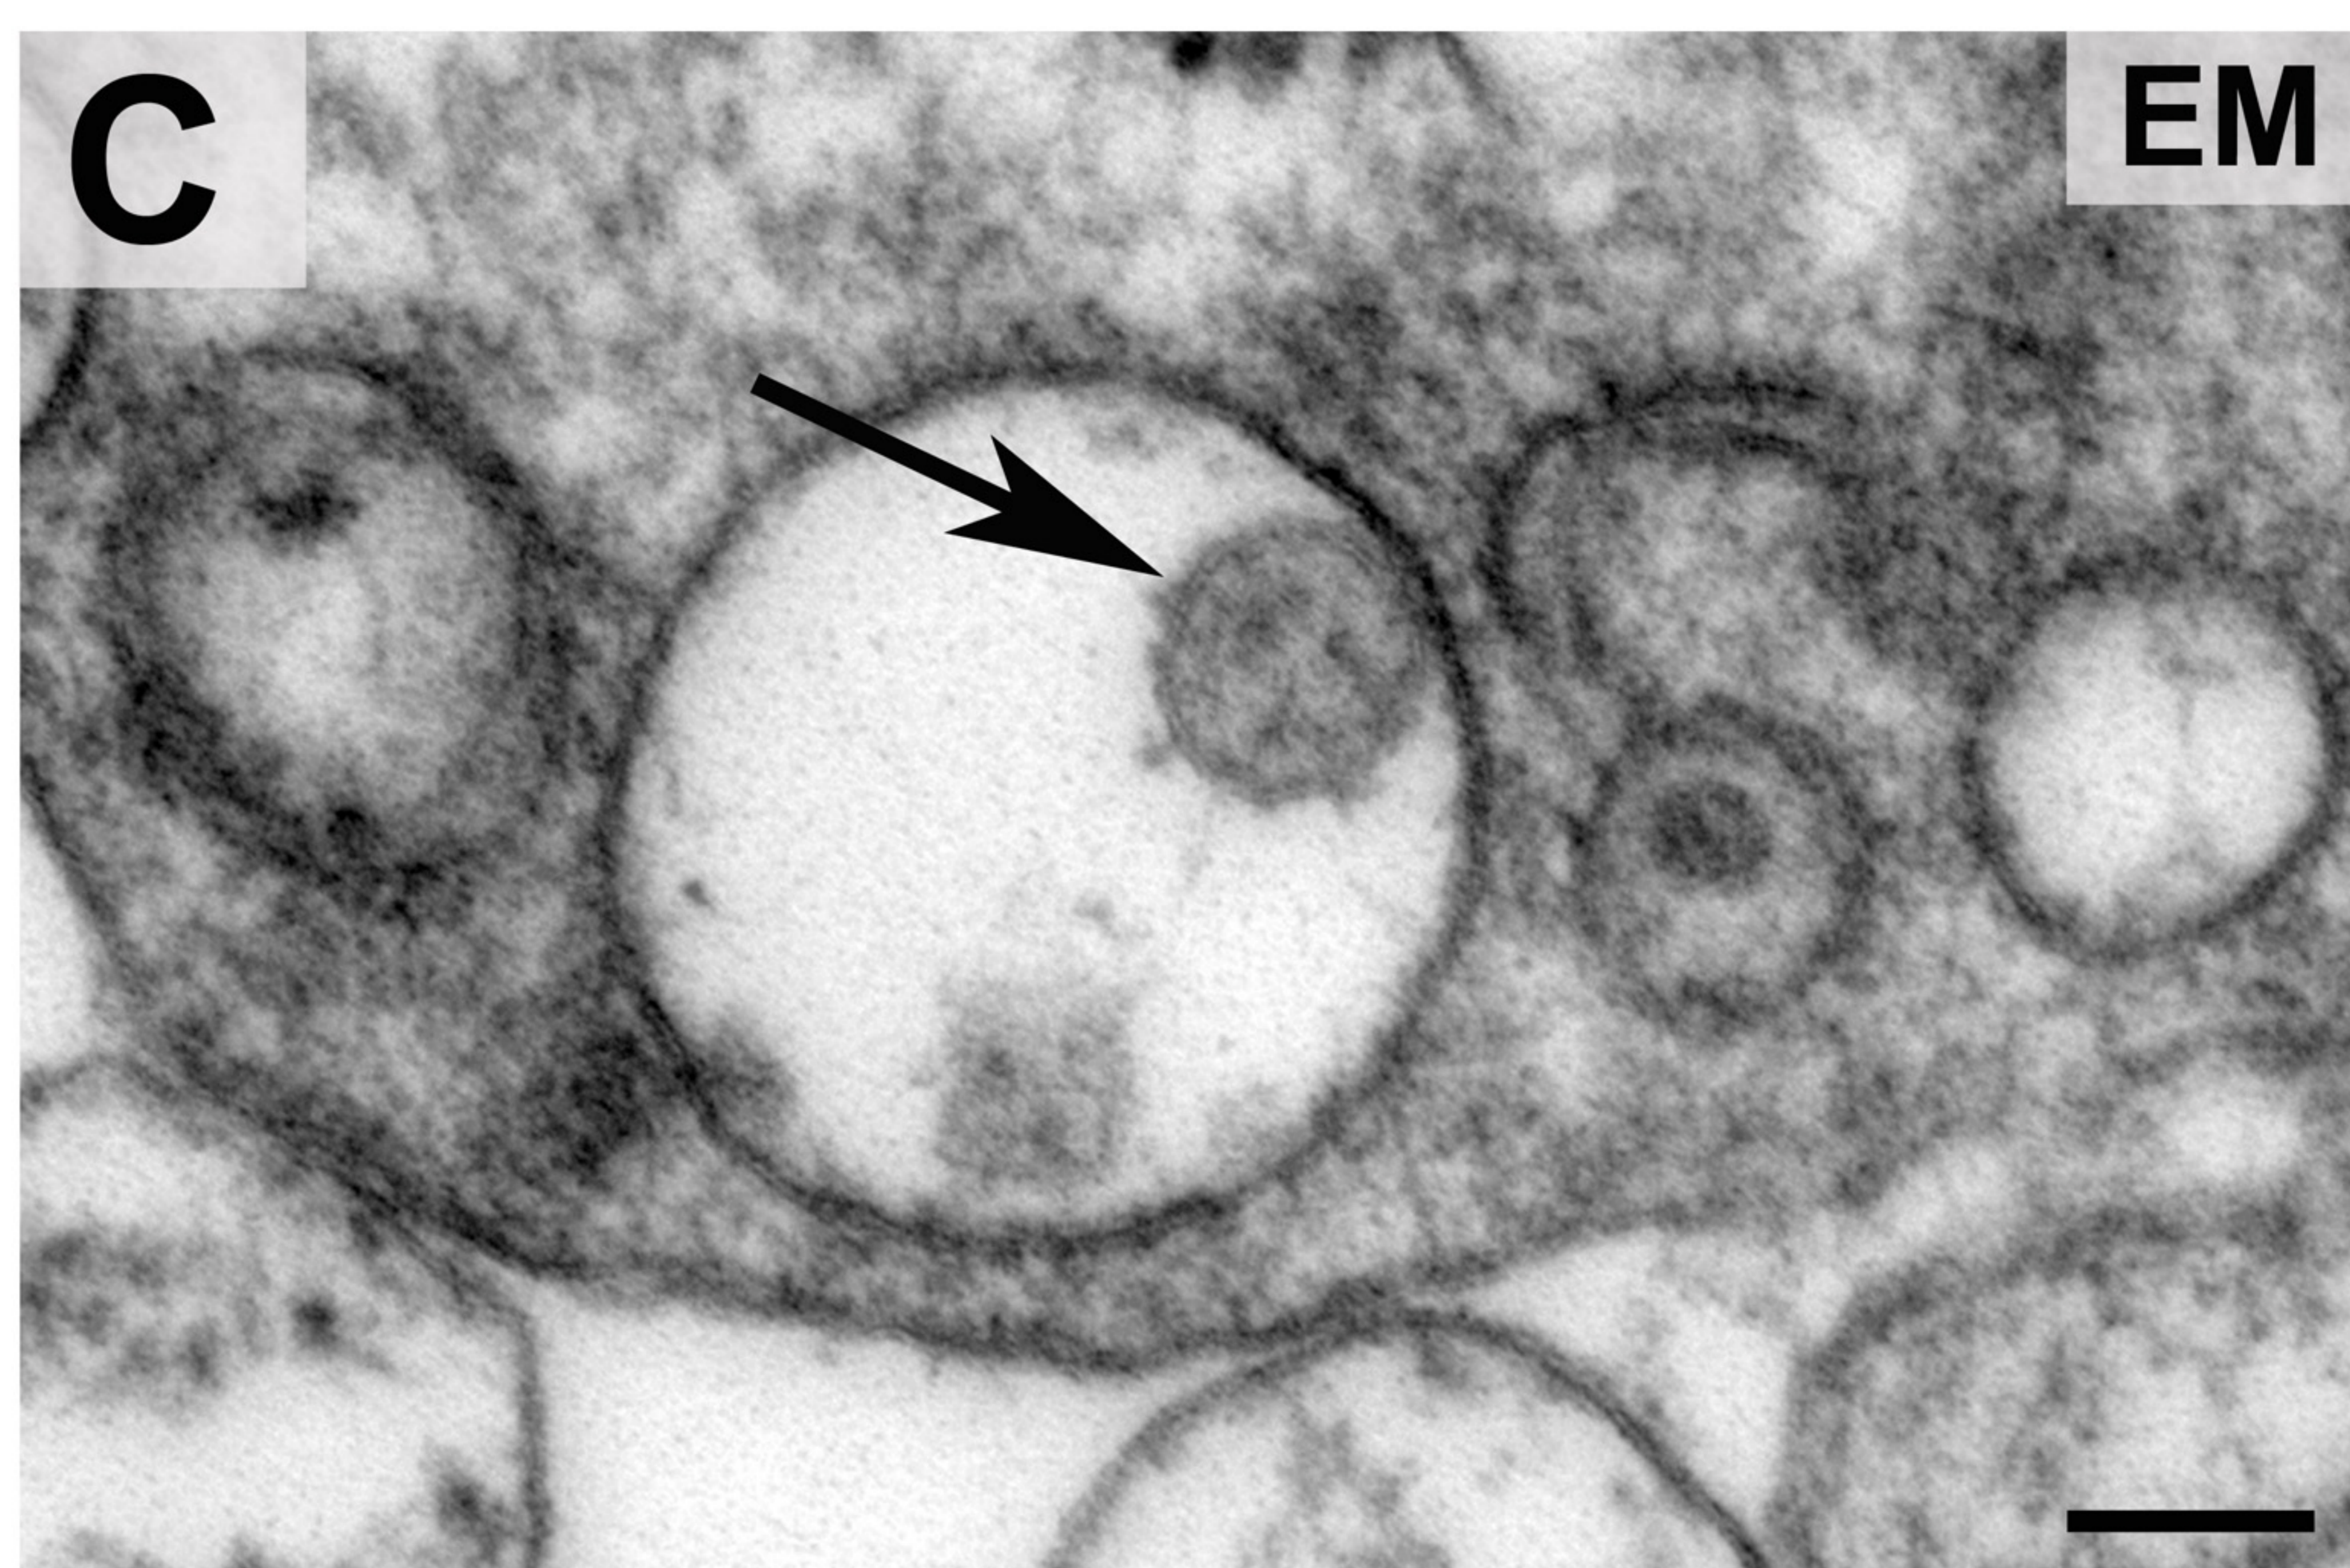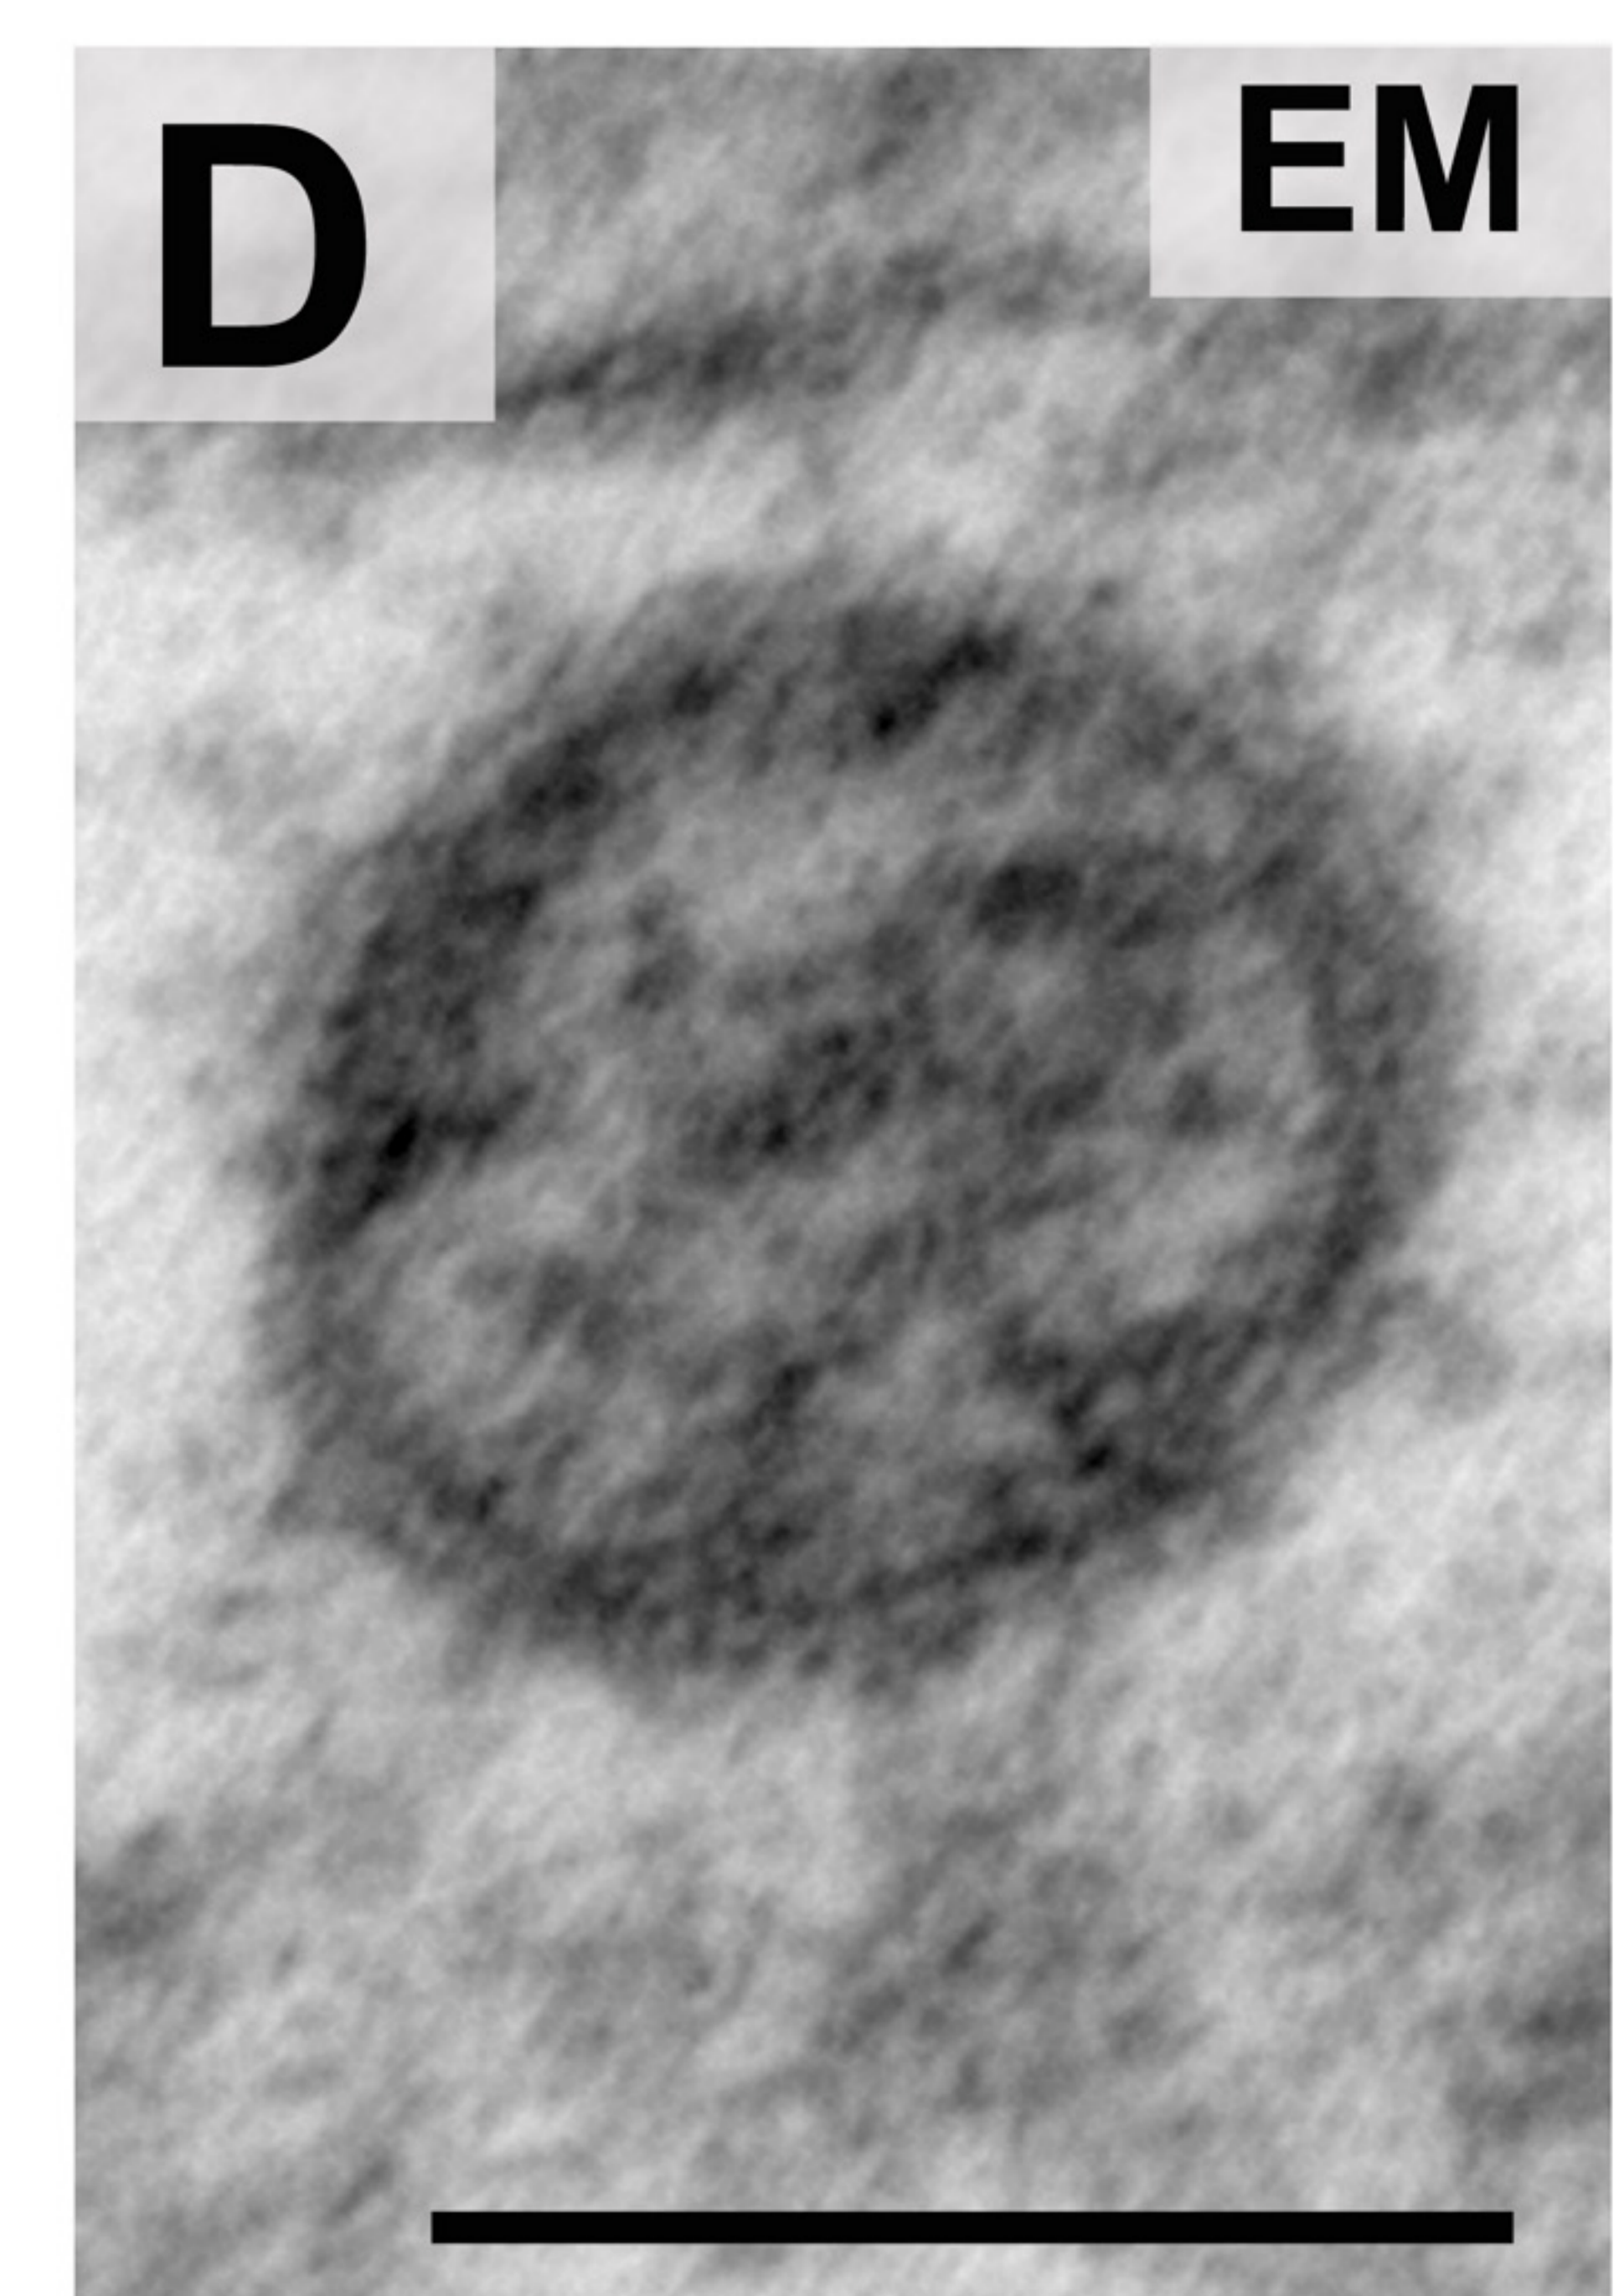

Source: https://www.biorxiv.org/content/biorxiv/early/2020/06/04/2020.06.04.135012.full.pdf
